# Supplementary material for: Copper-catalyzed three-component cascade reaction of alkynes, sulfonyl azides and simple aldehydes/ketones
Source: Royal Society of Chemistry journal article supplement (doi:10.1039/c6ob00146g), 2016-01-01

## Electronic Supplementary Information

### **Copper-Catalyzed Three-Component Cascade Reaction of Alkynes, Sulfonyl Azides and Simple Aldehydes/Ketones**

Yuanyuan Hu, Bingwei Zhou, and Congyang Wang\*

Beijing National Laboratory for Molecular Sciences, CAS Key Laboratory of Molecular  
Recognition and Function, Institute of Chemistry, Chinese Academy of Sciences, Beijing 100190,  
China.

Emails: [wangcy@iccas.ac.cn](mailto:wangcy@iccas.ac.cn)

#### Table of Contents

|                                                                                                                     |     |
|---------------------------------------------------------------------------------------------------------------------|-----|
| 1. General Information .....                                                                                        | S2  |
| 2. Cu-catalyzed Three-Component Cascade Reaction of Alkynes, Sulfonyl Azides, and<br>Simple Aldehydes/Ketones ..... | S2  |
| 2.1 Optimization of the Reaction Conditions .....                                                                   | S2  |
| 2.2 Experimental Details and Characterization of Products .....                                                     | S5  |
| 3. Mechanism Studies.....                                                                                           | S29 |
| 4. X-Ray Crystallography Data for <b>4aai</b> and <b>4hak</b> .....                                                 | S32 |
| 5. References .....                                                                                                 | S35 |
| 6. <sup>1</sup> H NMR, <sup>13</sup> C NMR, and <sup>19</sup> F NMR Spectra.....                                    | S36 |

## 1. General Information

Unless otherwise noted, all reactions were carried out in oven-dried reaction vessels with Teflon screw caps under nitrogen. Solvents were purified and dried according to standard methods prior to use. Flash column chromatography was performed on silica gel (200-300 mesh) with the indicated solvent mixtures. TLC analysis was performed on pre-coated, glass-backed silica gel plates and visualized with UV light.

The  $^1\text{H}$  NMR and  $^{13}\text{C}$  NMR spectra were recorded on a Bruker 300 AV or 400 AV spectrometers.  $^{19}\text{F}$  NMR spectra was recorded on a Bruker 500 AV. Chemical shifts ( $\delta$ ) were reported as parts per million (ppm) downfield from tetramethylsilane and the following abbreviations were used to identify the multiplicities: s = singlet, d = doublet, t = triplet, q = quartet, m = multiplet, br = broad and all combinations thereof can be explained by their integral parts. The high resolution mass spectra (HRMS) were recorded on a Thermo Scientific Exactive spectrometer or a Bruker APEX IV FTMS mass spectrometer.

All the substrates are commercially available except *tert*-butyl 3-ethynyl-1*H*-indole-1-carboxylate **1g**,<sup>1</sup> 2-ethynyl-naphthalene **1h**,<sup>2</sup> but-3-ynyl benzoate **1l**,<sup>2</sup> sulfonyl azides **2**,<sup>3</sup> 11-bromoundecanal **3m**,<sup>4</sup> (4*R*)-4-((10*S*,13*R*)-10,13-dimethyl-3,12-dioxohexadecahydro-1*H*-cyclopenta[*a*]phenanthren-17-yl)pentanal **3n**,<sup>5</sup> 4-phenyl-1-tosyl-1*H*-1,2,3-triazole **5**,<sup>6</sup> which are known compounds and synthesized according to reported literatures. Their spectral data are in agreement with the literature values.

## 2. Cu-catalyzed Three-Component Cascade Reaction of Alkynes, Sulfonyl Azides, and Simple Aldehydes/Ketones

### 2.1 Optimization of the Reaction Conditions

Initially, phenylacetylene **1a**, *p*-toluenesulfonyl azide **2a** and cyclohexanone **3a** were selected as the model substrates to screen the optimal reaction conditions (Table S1). Fortunately, **4aaa** was obtained in 74% NMR yield at the beginning (entry 1). After testing a series of solvent, DCE still proved to be the best (entries 2-7). The reaction proceeded a slightly better at room temperature but gave a drop in yield at a higher one (entries 8-9). Adjustments of the reaction concentrations and ratio of the substrates afforded the corresponding product in 85% NMR yield with 1:2:2 ratio of **1a:2a:3a** in 0.2 mL DCE (entries 10-12). Less amount of Me<sub>2</sub>Zn led to a decrease of yield (entry 13). In addition, various bases were next scrutinized and the reaction showed specific to zinc reagents while Et<sub>3</sub>N, used mostly in reported Cu-catalyzed multicomponent reactions, couldn't promote this transformation at all (entries 14-22). Halving the amount of the catalyst showed no obvious influence on the reaction outcome (entry 23). With no catalyst or with other metal catalyst such as MnBr<sub>2</sub>, FeBr<sub>2</sub>, ZnBr<sub>2</sub>, the reaction could not occur (entries 24-29). However, different copper salts including both Cu(I) and Cu(II) ones could deliver product **4aaa** in varied yields smoothly (entries 30-34). At last, the product **4aaa** was obtained in 88% NMR yield and in 76% isolated yield with 5 mol% Cu(NO<sub>3</sub>)<sub>2</sub> (entry 35).

**Table S1** Screening for the optimal reaction conditions<sup>a</sup>

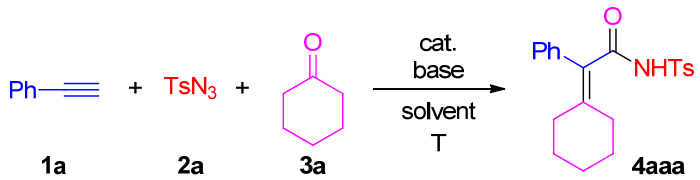

| entry | cat.              | base                            | solvent           | T (°C) | yield (%) <sup>b</sup> |
|-------|-------------------|---------------------------------|-------------------|--------|------------------------|
| 1     | CuBr <sub>2</sub> | Me <sub>2</sub> Zn <sup>c</sup> | DCE               | 60     | 74                     |
| 2     | CuBr <sub>2</sub> | Me <sub>2</sub> Zn <sup>c</sup> | Et <sub>2</sub> O | 60     | 68                     |
| 3     | CuBr <sub>2</sub> | Me <sub>2</sub> Zn <sup>c</sup> | 1,4-dioxane       | 60     | 58                     |

|                 |                                                                   |                                   |                    |      |                      |
|-----------------|-------------------------------------------------------------------|-----------------------------------|--------------------|------|----------------------|
| 4               | CuBr <sub>2</sub>                                                 | Me <sub>2</sub> Zn <sup>c</sup>   | THF                | 60   | 20                   |
| 5               | CuBr <sub>2</sub>                                                 | Me <sub>2</sub> Zn <sup>c</sup>   | toluene            | 60   | 24                   |
| 6               | CuBr <sub>2</sub>                                                 | Me <sub>2</sub> Zn <sup>c</sup>   | CH <sub>3</sub> CN | 60   | 0                    |
| 7               | CuBr <sub>2</sub>                                                 | Me <sub>2</sub> Zn <sup>c</sup>   | DMF                | 60   | 0                    |
| 8               | CuBr <sub>2</sub>                                                 | Me <sub>2</sub> Zn <sup>c</sup>   | DCE                | r.t. | 78                   |
| 9               | CuBr <sub>2</sub>                                                 | Me <sub>2</sub> Zn <sup>c</sup>   | DCE                | 80   | 66                   |
| 10              | CuBr <sub>2</sub>                                                 | Me <sub>2</sub> Zn <sup>c</sup>   | DCE <sup>d</sup>   | r.t. | 85                   |
| 11              | CuBr <sub>2</sub>                                                 | Me <sub>2</sub> Zn <sup>c</sup>   | DCE <sup>e</sup>   | r.t. | 77                   |
| 12 <sup>f</sup> | CuBr <sub>2</sub>                                                 | Me <sub>2</sub> Zn <sup>c</sup>   | DCE <sup>d</sup>   | r.t. | 85                   |
| 13 <sup>f</sup> | CuBr <sub>2</sub>                                                 | Me <sub>2</sub> Zn <sup>c,g</sup> | DCE <sup>d</sup>   | r.t. | 74                   |
| 14 <sup>f</sup> | CuBr <sub>2</sub>                                                 | - <sup>h</sup>                    | DCE <sup>d</sup>   | r.t. | 0                    |
| 15 <sup>f</sup> | CuBr <sub>2</sub>                                                 | Et <sub>2</sub> Zn <sup>i</sup>   | DCE <sup>d</sup>   | r.t. | 25                   |
| 16 <sup>f</sup> | CuBr <sub>2</sub>                                                 | MeMgBr <sup>j</sup>               | DCE <sup>d</sup>   | r.t. | 0                    |
| 17 <sup>f</sup> | CuBr <sub>2</sub>                                                 | Me <sub>3</sub> Al <sup>k</sup>   | DCE <sup>d</sup>   | r.t. | 0                    |
| 18 <sup>f</sup> | CuBr <sub>2</sub>                                                 | <i>n</i> -BuLi <sup>l</sup>       | DCE <sup>d</sup>   | r.t. | 0                    |
| 19 <sup>f</sup> | CuBr <sub>2</sub>                                                 | NaHMDS <sup>m</sup>               | DCE <sup>d</sup>   | r.t. | 0                    |
| 20 <sup>f</sup> | CuBr <sub>2</sub>                                                 | Et <sub>3</sub> N                 | DCE <sup>d</sup>   | r.t. | 0                    |
| 21 <sup>f</sup> | CuBr <sub>2</sub>                                                 | CsOAc                             | DCE <sup>d</sup>   | r.t. | 0                    |
| 22 <sup>f</sup> | CuBr <sub>2</sub>                                                 | LiOH                              | DCE <sup>d</sup>   | r.t. | 0                    |
| 23 <sup>f</sup> | CuBr <sub>2</sub> <sup>n</sup>                                    | Me <sub>2</sub> Zn <sup>c</sup>   | DCE <sup>d</sup>   | r.t. | 82                   |
| 24 <sup>f</sup> | - <sup>o</sup>                                                    | Me <sub>2</sub> Zn <sup>c</sup>   | DCE <sup>d</sup>   | r.t. | 0                    |
| 25 <sup>f</sup> | MnBr <sub>2</sub> <sup>n</sup>                                    | Me <sub>2</sub> Zn <sup>c</sup>   | DCE <sup>d</sup>   | r.t. | 0                    |
| 26 <sup>f</sup> | CoBr <sub>2</sub> <sup>n</sup>                                    | Me <sub>2</sub> Zn <sup>c</sup>   | DCE <sup>d</sup>   | r.t. | 0                    |
| 27 <sup>f</sup> | FeBr <sub>2</sub> <sup>n</sup>                                    | Me <sub>2</sub> Zn <sup>c</sup>   | DCE <sup>d</sup>   | r.t. | 0                    |
| 28 <sup>f</sup> | MgBr <sub>2</sub> <sup>n</sup>                                    | Me <sub>2</sub> Zn <sup>c</sup>   | DCE <sup>d</sup>   | r.t. | 0                    |
| 29 <sup>f</sup> | ZnBr <sub>2</sub> <sup>n</sup>                                    | Me <sub>2</sub> Zn <sup>c</sup>   | DCE <sup>d</sup>   | r.t. | 0                    |
| 30 <sup>f</sup> | Cu(OAc) <sub>2</sub> <sup>n</sup>                                 | Me <sub>2</sub> Zn <sup>c</sup>   | DCE <sup>d</sup>   | r.t. | 80                   |
| 31 <sup>f</sup> | CuBr <sup>n</sup>                                                 | Me <sub>2</sub> Zn <sup>c</sup>   | DCE <sup>d</sup>   | r.t. | 70                   |
| 32 <sup>f</sup> | CuSO <sub>4</sub> <sup>n</sup>                                    | Me <sub>2</sub> Zn <sup>c</sup>   | DCE <sup>d</sup>   | r.t. | 30                   |
| 33 <sup>f</sup> | CuCl <sub>2</sub> ·2H <sub>2</sub> O <sup>n</sup>                 | Me <sub>2</sub> Zn <sup>c</sup>   | DCE <sup>d</sup>   | r.t. | 77                   |
| 34 <sup>f</sup> | Cu(NO <sub>3</sub> ) <sub>2</sub> ·3H <sub>2</sub> O <sup>n</sup> | Me <sub>2</sub> Zn <sup>c</sup>   | DCE <sup>d</sup>   | r.t. | 87                   |
| 35 <sup>f</sup> | Cu(NO <sub>3</sub> ) <sub>2</sub> <sup>n</sup>                    | Me <sub>2</sub> Zn <sup>c</sup>   | DCE <sup>d</sup>   | r.t. | 88 (76) <sup>p</sup> |

<sup>a</sup> Reaction conditions unless otherwise noted: **1a** (0.2 mmol), **2a** (0.8 mmol), **3a** (0.4 mmol), catalyst (0.02 mmol), base (0.3 mmol), solvent (0.5 mL), 60 °C, 6 h under N<sub>2</sub> atmosphere. <sup>b</sup> Yields determined by <sup>1</sup>H NMR analysis with 1,3,5-trimethoxybenzene as an internal standard. <sup>c</sup> 1.2 M in toluene. <sup>d</sup> 0.2 mL DCE. <sup>e</sup> 1.0 mL DCE. <sup>f</sup> **1a/2a/3a** = 1:2:2. <sup>g</sup> 0.2 mmol Me<sub>2</sub>Zn. <sup>h</sup> No base. <sup>i</sup> 1.0 M in hexane. <sup>j</sup> 3.0 M in Et<sub>2</sub>O. <sup>k</sup> 1.0 M in heptane. <sup>l</sup> 2.5 M in hexane. <sup>m</sup> 2 M in THF. <sup>n</sup> 0.01 mmol catalyst. <sup>o</sup> No catalyst. <sup>p</sup> Isolated yield on 0.5 mmol scale.

## 2.2 Experimental Details and Characterization of Products

To a 25 ml oven-dried Schlenk tube was added Cu(NO<sub>3</sub>)<sub>2</sub> (0.025 mmol, 5.0 mol%, 4.7 mg), DCE (0.5 mL), phenylacetylene **1a** (0.5 mmol, 51.0 mg), *p*-toluenesulfonyl azide **2a** (1.0 mmol, 197.0 mg), cyclohexanone **3a** (1.0 mmol, 98.0 mg), and Me<sub>2</sub>Zn (0.75 mmol, 1.2 M in toluene, 0.625 mL) sequentially under nitrogen. The tube was sealed and stirred at room temperature for 6 h. After completion, the reaction mixture was diluted with ethyl acetate (5.0 mL) and filtered through a short pad silica gel washing with ethyl acetate (20 mL). The filtrate was concentrated and purified by silica gel column chromatography to provide the product **4aaa** in 76% yield.

### 2-cyclohexylidene-2-phenyl-*N*-tosylacetamide (**4aaa**)

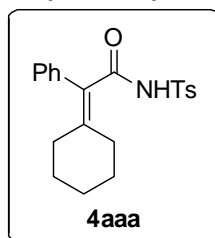

Following a general procedure: To a 25 ml oven-dried Schlenk tube was added Cu(NO<sub>3</sub>)<sub>2</sub> (0.025 mmol, 5.0 mol%, 4.7 mg), DCE (0.5 mL), phenylacetylene **1a** (0.5 mmol, 51.0 mg), *p*-toluenesulfonyl azide **2a** (1.0 mmol, 197.0 mg), cyclohexanone **3a** (1.0 mmol, 98.0 mg) and Me<sub>2</sub>Zn (0.75 mmol, 1.2 M in toluene, 0.625 mL) sequentially under nitrogen. The tube was sealed and stirred at room temperature for 6 h. After completion, the reaction mixture was diluted with ethyl acetate (5.0 mL) and filtered through a short pad silica gel washing with ethyl acetate (20 mL). The filtrate was concentrated and purified by silica gel column chromatography to provide the product **4aaa** in 76% yield.

<sup>1</sup>H NMR (CDCl<sub>3</sub>, 400 MHz) δ 8.05 (s, 1H), 7.84 (d, *J* = 8.4 Hz, 2H), 7.31-7.28 (m, 5H), 7.07-7.03 (m, 2H), 2.47 (t, *J* = 6.0 Hz, 2H), 2.42 (s, 3H), 2.01 (t, *J* = 6.0 Hz, 2H), 1.63-1.59 (m, 2H), 1.57-1.48 (m, 4H);

<sup>13</sup>C NMR (CDCl<sub>3</sub>, 100 MHz) δ 165.9, 153.9, 144.8, 135.8, 135.6, 129.6, 129.4, 129.0, 128.3, 128.1, 127.6, 32.8, 32.3, 28.3, 28.2, 26.1, 21.7;

HRMS (ESI) Calculated for C<sub>21</sub>H<sub>23</sub>O<sub>3</sub>NS<sup>+</sup> ([M+H]<sup>+</sup>): 392.12909, found: 392.12839.

### 2-cyclohexylidene-2-p-tolyl-N-tosylacetamide (4baa)

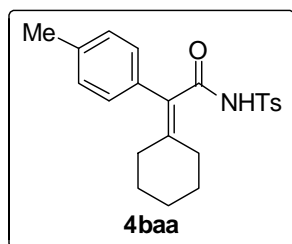

Following a general procedure: To a 25 ml oven-dried Schlenk tube was added  $\text{Cu}(\text{NO}_3)_2$  (0.025 mmol, 5.0 mol%, 4.7 mg), DCE (1.25 mL), 1-ethynyl-4-methylbenzene **1b** (0.5 mmol, 59.0 mg), *p*-toluenesulfonyl azide **2a** (1.0 mmol, 197.0 mg), cyclohexanone **3a** (1.0 mmol, 98.0 mg) and  $\text{Me}_2\text{Zn}$  (0.75 mmol, 1.2 M in toluene, 0.625 mL) sequentially under nitrogen. The tube was sealed and stirred at room temperature for 6 h. After completion, the reaction mixture was diluted with ethyl acetate (5.0 mL) and filtered through a short pad silica gel washing with ethyl acetate (20 mL). The filtrate was concentrated and purified by silica gel column chromatography to provide the product **4baa** in 65% yield.

$^1\text{H NMR}$  ( $\text{CDCl}_3$ , 400 MHz)  $\delta$  7.91 (s, 1H), 7.84 (d,  $J = 8.0$  Hz, 2H), 7.30 (d,  $J = 8.0$  Hz, 2H), 7.13 (d,  $J = 7.6$  Hz, 2H), 6.93 (d,  $J = 7.6$  Hz, 2H), 2.52 (t,  $J = 5.6$  Hz, 2H), 2.43 (s, 3H), 2.34 (s, 3H), 2.01 (t,  $J = 5.6$  Hz, 2H), 1.63-1.60 (m, 2H), 1.54-1.48 (m, 4H);

$^{13}\text{C NMR}$  ( $\text{CDCl}_3$ , 100 MHz)  $\delta$  165.8, 154.8, 144.8, 138.1, 135.7, 133.0, 129.8, 129.5, 129.4, 128.4, 127.3, 33.1, 32.2, 28.4, 28.3, 26.2, 21.7, 21.2;

**HRMS (ESI)** Calculated for  $\text{C}_{22}\text{H}_{25}\text{O}_3\text{NS}^+$  ( $[\text{M}+\text{H}]^+$ ): 406.14474, found: 406.14467.

### 2-cyclohexylidene-2-(4-methoxyphenyl)-N-tosylacetamide (4caa)

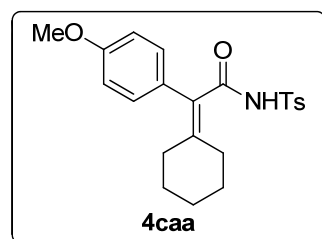

Following a general procedure: To a 25 ml oven-dried Schlenk tube was added  $\text{Cu}(\text{NO}_3)_2$  (0.025 mmol, 5.0 mol%, 4.7 mg), DCE (1.25 mL), 1-ethynyl-4-methoxybenzene **1c** (0.5 mmol, 66.0 mg), *p*-toluenesulfonyl azide **2a** (1.0 mmol, 197.0 mg), cyclohexanone **3a** (1.0 mmol, 98.0 mg) and  $\text{Me}_2\text{Zn}$  (0.75 mmol, 1.2 M in toluene, 0.625 mL) sequentially under nitrogen. The tube was sealed and stirred at room temperature for 6 h. After completion, the reaction mixture was diluted with ethyl acetate (5.0 mL) and filtered through a short pad silica gel washing with ethyl acetate (20 mL). The filtrate was concentrated and purified by silica gel column

chromatography to provide the product **4caa** in 55% yield.

**<sup>1</sup>H NMR (CDCl<sub>3</sub>, 400 MHz)** δ 7.86-7.83 (m, 3H), 7.31 (d, *J* = 8.0 Hz, 2H), 6.96 (d, *J* = 8.4 Hz, 2H), 6.85 (d, *J* = 8.4 Hz, 2H), 3.81 (s, 3H), 2.52 (t, *J* = 5.6 Hz, 2H), 2.44 (s, 3H), 2.02 (t, *J* = 5.6 Hz, 2H), 1.63-1.60 (m, 2H), 1.55-1.49 (m, 4H);

**<sup>13</sup>C NMR (CDCl<sub>3</sub>, 100 MHz)** δ 165.9, 159.5, 154.9, 144.9, 135.7, 130.9, 129.5, 128.4, 128.1, 127.0, 114.6, 55.3, 33.1, 32.3, 28.4, 28.4, 26.3, 21.7;

**HRMS (ESI)** Calculated for C<sub>22</sub>H<sub>25</sub>O<sub>4</sub>NS<sup>+</sup> ([M+H]<sup>+</sup>): 422.13965, found: 422.13941.

### 2-cyclohexylidene-2-(4-fluorophenyl)-*N*-tosylacetamide (**4daa**)

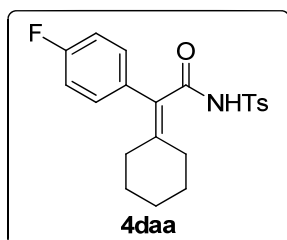

Following a general procedure: To a 25 ml oven-dried Schlenk tube was added Cu(NO<sub>3</sub>)<sub>2</sub> (0.05 mmol, 10.0 mol%, 9.4 mg), DCE (1.25 mL), 1-ethynyl-4-fluorobenzene **1d** (0.5 mmol, 60.0 mg), *p*-toluenesulfonyl azide **2a** (1.0 mmol, 197.0 mg), cyclohexanone **3a** (1.0 mmol, 98.0 mg) and Me<sub>2</sub>Zn (0.75 mmol, 1.2 M in toluene, 0.625 mL) sequentially under nitrogen. The tube was sealed and stirred at room temperature for 6 h. After completion, the reaction mixture was diluted with ethyl acetate (5.0 mL) and filtered through a short pad silica gel washing with ethyl acetate (20 mL). The filtrate was concentrated and purified by silica gel column chromatography to provide the product **4daa** in 51% yield.

**<sup>1</sup>H NMR (CDCl<sub>3</sub>, 400 MHz)** δ 8.23 (s, 1H), 7.83 (d, *J* = 8.4 Hz, 2H), 7.31 (d, *J* = 8.0 Hz, 2H), 7.06-7.01 (m, 2H), 7.00-6.94 (m, 2H), 2.44 (s, 3H), 2.40 (t, *J* = 6.0 Hz, 2H), 1.99 (t, *J* = 6.0 Hz, 2H), 1.61-1.56 (m, 2H), 1.54-1.48 (m, 4H);

**<sup>13</sup>C NMR (CDCl<sub>3</sub>, 100 MHz)** δ 166.1, 162.4 (d, <sup>1</sup>*J*<sub>C-F</sub> = 246.5 Hz), 153.2, 145.1, 135.5, 131.6 (d, <sup>4</sup>*J*<sub>C-F</sub> = 3.4 Hz), 131.4 (d, <sup>3</sup>*J*<sub>C-F</sub> = 8.0 Hz), 129.5, 128.3, 126.8, 116.0 (d, <sup>2</sup>*J*<sub>C-F</sub> = 21.3 Hz), 32.5, 32.4, 28.2, 28.2, 26.1, 21.7;

**HRMS (ESI)** Calculated for C<sub>21</sub>H<sub>22</sub>O<sub>3</sub>FNS<sup>+</sup> ([M+H]<sup>+</sup>): 410.11966, found: 410.11948.

### 2-cyclohexylidene-2-m-tolyl-*N*-tosylacetamide (**4eaa**)

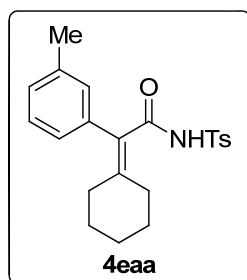

Following a general procedure: To a 25 ml oven-dried Schlenk tube was added  $\text{Cu}(\text{NO}_3)_2$  (0.025 mmol, 5.0 mol%, 4.7 mg), DCE (1.25 mL), 1-ethynyl-3-methylbenzene **1e** (0.5 mmol, 58.0 mg), *p*-toluenesulfonyl azide **2a** (1.0 mmol, 197.0 mg), cyclohexanone **3a** (1.0 mmol, 98.0 mg) and  $\text{Me}_2\text{Zn}$  (0.75 mmol, 1.2 M in toluene, 0.625 mL) sequentially under nitrogen. The tube was sealed and stirred at room temperature for 6 h. After completion, the reaction mixture was diluted with ethyl acetate (5.0 mL) and filtered through a short pad silica gel washing with ethyl acetate (20 mL). The filtrate was concentrated and purified by silica gel column chromatography to provide the product **4eaa** in 74% yield.

$^1\text{H NMR}$  ( $\text{CDCl}_3$ , 400 MHz)  $\delta$  7.90 (s, 1H), 7.84 (d,  $J = 8.0$  Hz, 2H), 7.30 (d,  $J = 8.0$  Hz, 2H), 7.21 (t,  $J = 7.2$  Hz, 1H), 7.11 (d,  $J = 7.2$  Hz, 1H), 6.85-6.82 (m, 2H), 2.50 (t,  $J = 5.6$  Hz, 2H), 2.43 (s, 3H), 2.29 (s, 3H), 2.01 (t,  $J = 5.6$  Hz, 2H), 1.63-1.61 (m, 2H), 1.55-1.48 (m, 4H);

$^{13}\text{C NMR}$  ( $\text{CDCl}_3$ , 100 MHz)  $\delta$  165.8, 154.5, 144.8, 138.8, 135.9, 135.7, 130.2, 129.4, 129.0, 128.4, 127.6, 126.7, 33.0, 32.2, 28.4, 28.3, 26.2, 21.7, 21.4;

**HRMS (ESI)** Calculated for  $\text{C}_{22}\text{H}_{25}\text{O}_3\text{NS}^+$  ( $[\text{M}+\text{H}]^+$ ): 406.14474, found: 406.14438.

### 2-cyclohexylidene-2-(thiophen-3-yl)-*N*-tosylacetamide (**4faa**)

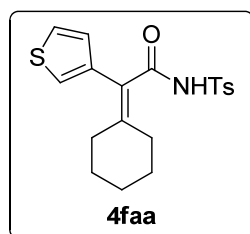

Following a general procedure: To a 25 ml oven-dried Schlenk tube was added  $\text{Cu}(\text{NO}_3)_2$  (0.05 mmol, 10.0 mol%, 9.4 mg), DCE (1.25 mL), 3-ethynylthiophene **1f** (0.5 mmol, 54.0 mg), *p*-toluenesulfonyl azide **2a** (1.0 mmol, 197.0 mg), cyclohexanone **3a** (1.0 mmol, 98.0 mg) and  $\text{Me}_2\text{Zn}$  (0.75 mmol, 1.2 M in toluene, 0.625 mL) sequentially under nitrogen. The tube was sealed and stirred at room temperature for 6 h. After completion, the reaction mixture was diluted with ethyl acetate (5.0 mL) and filtered through a short pad silica gel washing with ethyl acetate



(20 mL). The filtrate was concentrated and purified by silica gel column chromatography to provide the product **4faa** in 71% yield.

**<sup>1</sup>H NMR (CDCl<sub>3</sub>, 400 MHz)** δ 8.16 (s, 1H), 7.86 (d, *J* = 8.0 Hz, 2H), 7.31 (d, *J* = 7.6 Hz, 3H), 7.01 (s, 1H), 6.80 (d, *J* = 4.8 Hz, 1H), 2.46-2.43 (m, 5H), 2.10-2.08 (m, 2H), 1.63-1.60 (m, 2H), 1.55-1.48 (m, 4H);

**<sup>13</sup>C NMR (CDCl<sub>3</sub>, 100 MHz)** δ 165.7, 154.7, 144.9, 135.7, 135.6, 129.5, 128.5, 128.3, 126.6, 124.7, 122.3, 32.8, 32.2, 28.2, 28.2, 26.1, 21.7;

**HRMS (ESI)** Calculated for C<sub>19</sub>H<sub>21</sub>O<sub>3</sub>NS<sub>2</sub><sup>+</sup> ([M+H]<sup>+</sup>): 398.08551, found: 398.08542.

### 3-(1-cyclohexylidene-2-(4-methylphenylsulfonamido)-2-oxoethyl)-1*H*-indole-1-carboxylate (**4gaa**)

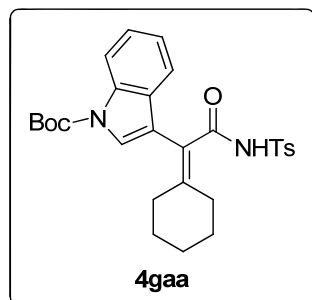

Following a general procedure: To a 25 ml oven-dried Schlenk tube was added Cu(NO<sub>3</sub>)<sub>2</sub> (0.05 mmol, 10.0 mol%, 9.4 mg), DCE (1.25 mL), *tert*-butyl 3-ethynyl-1*H*-indole-1-carboxylate **1g** (0.5 mmol, 120.5 mg), *p*-toluenesulfonyl azide **2a** (1.0 mmol, 197.0 mg), cyclohexanone **3a** (1.0 mmol, 98.0 mg) and Me<sub>2</sub>Zn (0.75 mmol, 1.2 M in toluene, 0.625 mL) sequentially under nitrogen. The tube was sealed and stirred at room temperature for 6 h. After completion, the reaction mixture was diluted with ethyl acetate (5.0 mL) and filtered through a short pad silica gel washing with ethyl acetate (20 mL). The filtrate was concentrated and purified by silica gel column chromatography to provide the product **4gaa** in 51% yield.

**<sup>1</sup>H NMR (CDCl<sub>3</sub>, 400 MHz)** δ 8.13-8.09 (m, 2H), 7.70 (d, *J* = 7.6 Hz, 2H), 7.44 (s, 1H), 7.33-7.28 (m, 1H), 7.24 (d, *J* = 8.0 Hz, 2H), 7.06 (d, *J* = 4.0 Hz, 2H), 2.66 (t, *J* = 5.6 Hz, 2H), 2.44 (s, 3H), 2.09 (t, *J* = 5.6 Hz, 2H), 1.68 (s, 11H), 1.57-1.55 (m, 2H), 1.50-1.48 (m, 2H);

**<sup>13</sup>C NMR (CDCl<sub>3</sub>, 100 MHz)** δ 165.3, 159.4, 149.4, 144.7, 135.4, 135.2, 129.5, 129.4,

128.4, 125.5, 125.0, 123.1, 119.4, 117.9, 115.5, 115.4, 84.4, 33.9, 32.2, 28.7, 28.5, 28.2, 26.2, 21.7;

**HRMS (ESI)** Calculated for  $C_{28}H_{32}O_5N_2S^+$  ( $[M+H]^+$ ): 531.19241, found: 531.19194.

### 2-cyclohexylidene-2-(naphthalen-2-yl)-*N*-tosylacetamide (**4haa**)

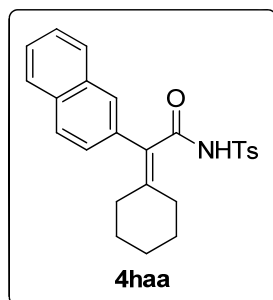

Following a general procedure: To a 25 ml oven-dried Schlenk tube was added  $Cu(NO_3)_2$  (0.05 mmol, 10.0 mol%, 9.4 mg), DCE (1.25 mL), 2-ethynynaphthalene **1h** (0.5 mmol, 76.0 mg), *p*-toluenesulfonyl azide **2a** (1.0 mmol, 197.0 mg), cyclohexanone **3a** (1.0 mmol, 98.0 mg) and  $Me_2Zn$  (0.75 mmol, 1.2 M in toluene, 0.625 mL) sequentially under nitrogen. The tube was sealed and stirred at room temperature for 6 h. After completion, the reaction mixture was diluted with ethyl acetate (5.0 mL) and filtered through a short pad silica gel washing with ethyl acetate (20 mL). The filtrate was concentrated and purified by silica gel column chromatography to provide the product **4haa** in 59% yield.

**$^1H$  NMR** ( $CDCl_3$ , 400 MHz)  $\delta$  8.18 (s, 1H), 7.80-7.74 (m, 4H), 7.69-6.66 (m, 1H), 7.50-7.43 (m, 3H), 7.21 (d,  $J = 8.0$  Hz, 2H), 7.14 (dd,  $J_1 = 8.4$  Hz,  $J_2 = 1.2$  Hz, 1H), 2.49 (t,  $J = 6.0$  Hz, 2H), 2.40 (s, 3H), 2.04 (t,  $J = 6.0$  Hz, 2H), 1.64-1.62 (m, 2H), 1.54-1.48 (m, 4H);

**$^{13}C$  NMR** ( $CDCl_3$ , 100 MHz)  $\delta$  166.0, 153.9, 144.8, 135.4, 133.3, 133.1, 132.7, 129.4, 128.8, 128.7, 128.3, 128.0, 127.7, 127.6, 127.2, 126.6, 126.5, 32.8, 32.4, 28.3, 28.3, 26.2, 21.7;

**HRMS (ESI)** Calculated for  $C_{25}H_{25}O_3NS^+$  ( $[M+H]^+$ ): 442.14474, found: 442.14468.

### 2-cyclohexenyl-2-cyclohexylidene-*N*-tosylacetamide (**4iaa**)

Following a general procedure: To a 25 ml oven-dried Schlenk tube was added  $Cu(NO_3)_2$  (0.05 mmol, 10.0 mol%, 9.4 mg), DCE (1.25 mL), 1-ethynylcyclohex-1-ene

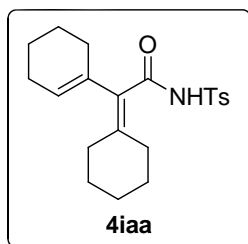

**1i** (0.5 mmol, 53.0 mg), *p*-toluenesulfonyl azide **2a** (1.0 mmol, 197.0 mg), cyclohexanone **3a** (1.0 mmol, 98.0 mg) and Me<sub>2</sub>Zn (0.75 mmol, 1.2 M in toluene, 0.625 mL) sequentially under nitrogen. The tube was sealed and stirred at room temperature

for 6 h. After completion, the reaction mixture was diluted with ethyl acetate (5.0 mL) and filtered through a short pad silica gel washing with ethyl acetate (20 mL). The filtrate was concentrated and purified by silica gel column chromatography to provide the product **4iaa** in 45% yield.

<sup>1</sup>H NMR (CDCl<sub>3</sub>, 400 MHz) δ 8.37 (s, 1H), 7.94 (d, *J* = 7.6 Hz, 2H), 7.33 (d, *J* = 8.0 Hz, 2H), 5.63 (s, 1H), 2.43-2.40 (m, 5H), 2.15-2.13 (m, 4H), 1.77-1.75 (m, 2H), 1.61-1.59 (m, 4H), 1.55-1.52 (m, 6H);

<sup>13</sup>C NMR (CDCl<sub>3</sub>, 100 MHz) δ 165.4, 153.4, 144.8, 135.8, 135.3, 130.2, 129.5, 128.4, 33.0, 31.8, 29.1, 28.8, 28.4, 26.3, 25.4, 22.7, 21.7;

HRMS (ESI) Calculated for C<sub>21</sub>H<sub>27</sub>O<sub>3</sub>NS<sup>+</sup> ([M+H]<sup>+</sup>): 396.16039, found: 396.16010.

### 2-cyclohexylidene-*N*-tosylhexanamide (**4jaa**)

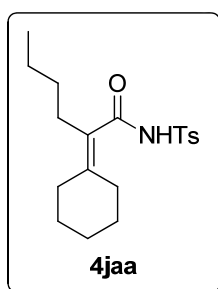

Following a general procedure: To a 25 ml oven-dried Schlenk tube was added Cu(NO<sub>3</sub>)<sub>2</sub> (0.05 mmol, 10.0 mol%, 9.4 mg), DCE (1.25 mL), hex-1-yne **1j** (0.5 mmol, 41.0 mg), *p*-toluenesulfonyl azide **2a** (1.0 mmol, 197.0 mg), cyclohexanone **3a** (1.0 mmol, 98.0 mg) and Me<sub>2</sub>Zn (0.75 mmol, 1.2 M in toluene, 0.625 mL)

sequentially under nitrogen. The tube was sealed and stirred at room temperature for 6 h. After completion, the reaction mixture was diluted with ethyl acetate (5.0 mL) and filtered through a short pad silica gel washing with ethyl acetate (20 mL). The filtrate was concentrated and purified by silica gel column chromatography to provide the product **4jaa** in 72% yield.

<sup>1</sup>H NMR (CDCl<sub>3</sub>, 400 MHz) δ 8.61 (s, 1H), 7.96 (d, *J* = 8.4 Hz, 2H), 7.34 (d, *J* = 8.4 Hz, 2H), 2.44 (s, 3H), 2.15-2.08 (m, 4H), 2.05-1.99 (m, 2H), 1.52-1.50 (m, 6H),

1.21-1.16 (m, 4H), 0.81-0.77 (m, 3H);

$^{13}\text{C}$  NMR ( $\text{CDCl}_3$ , 100 MHz)  $\delta$  169.5, 145.0, 143.5, 135.8, 129.5, 128.4, 127.4, 32.7, 31.1, 30.0, 29.0, 28.0, 27.7, 26.3, 22.4, 21.7, 13.8;

HRMS (ESI) Calculated for  $\text{C}_{19}\text{H}_{27}\text{O}_3\text{NS}^+$  ( $[\text{M}+\text{H}]^+$ ): 372.16039, found: 372.16001.

### 6-chloro-2-cyclohexylidene-*N*-tosylhexanamide (4kaa)

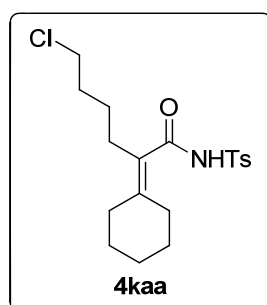

Following a general procedure: To a 25 ml oven-dried Schlenk tube was added  $\text{Cu}(\text{NO}_3)_2$  (0.025 mmol, 5.0 mol%, 4.7 mg), DCE (1.25 mL), 6-chlorohex-1-yne **1k** (0.5 mmol, 58.0 mg), *p*-toluenesulfonyl azide **2a** (1.0 mmol, 197.0 mg), cyclohexanone **3a** (1.0 mmol, 98.0 mg) and  $\text{Me}_2\text{Zn}$  (0.75 mmol,

1.2 M in toluene, 0.625 mL) sequentially under nitrogen. The tube was sealed and stirred at room temperature for 6 h. After completion, the reaction mixture was diluted with ethyl acetate (5.0 mL) and filtered through a short pad silica gel washing with ethyl acetate (20 mL). The filtrate was concentrated and purified by silica gel column chromatography to provide the product **4kaa** in 53% yield.

$^1\text{H}$  NMR ( $\text{CDCl}_3$ , 400 MHz)  $\delta$  8.71 (s, 1H), 7.96 (d,  $J = 8.0$  Hz, 2H), 7.35 (d,  $J = 8.4$  Hz, 2H), 3.41 (t,  $J = 6.4$  Hz, 2H), 2.45 (s, 3H), 2.17 (t,  $J = 8.0$  Hz, 2H), 2.10-2.04 (m, 4H), 1.69-1.61 (m, 2H), 1.52-1.51 (m, 6H), 1.41-1.32 (m, 2H);

$^{13}\text{C}$  NMR ( $\text{CDCl}_3$ , 100 MHz)  $\delta$  169.3, 145.2, 144.3, 135.6, 129.6, 128.4, 126.6, 44.7, 32.7, 31.9, 30.1, 28.4, 28.0, 27.7, 26.3, 26.1, 21.7;

HRMS (ESI) Calculated for  $\text{C}_{19}\text{H}_{26}\text{O}_3\text{NCINaS}^+$  ( $[\text{M}+\text{H}]^+$ ): 406.12141, found: 406.12122.

### 3-cyclohexylidene-4-(4-methylphenylsulfonamido)-4-oxobutyl benzoate (4laa)

Following a general procedure: To a 25 ml oven-dried Schlenk tube was added  $\text{Cu}(\text{NO}_3)_2$  (0.025 mmol, 5.0 mol%, 4.7 mg), DCE (1.25 mL), but-3-ynyl benzoate **1l**

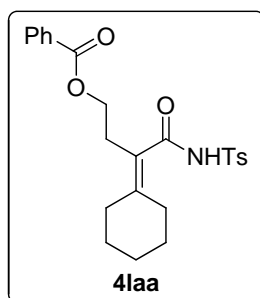

(0.5 mmol, 87.0 mg), *p*-toluenesulfonyl azide **2a** (1.0 mmol, 197.0 mg), cyclohexanone **3a** (1.0 mmol, 98.0 mg) and Me<sub>2</sub>Zn (0.75 mmol, 1.2 M in toluene, 0.625 mL) sequentially under nitrogen. The tube was sealed and stirred at room temperature for 6 h. After completion, the reaction mixture was diluted with ethyl acetate (5.0 mL) and filtered through a short pad silica gel washing with ethyl acetate (20 mL). The filtrate was concentrated and purified by silica gel column chromatography to provide the product **4laa** in 57% yield.

<sup>1</sup>H NMR (CDCl<sub>3</sub>, 400 MHz) δ 9.46 (s, 1H), 8.02 (d, *J* = 8.0 Hz, 2H), 7.98 (d, *J* = 8.0 Hz, 2H), 7.57 (t, *J* = 7.6 Hz, 1H), 7.44 (t, *J* = 7.6 Hz, 2H), 7.31 (d, *J* = 8.0 Hz, 2H), 4.31 (t, *J* = 6.0 Hz, 2H), 2.61 (t, *J* = 6.0 Hz, 2H), 2.41 (s, 3H), 2.08-2.02 (m, 4H), 1.42-1.37 (m, 6H);

<sup>13</sup>C NMR (CDCl<sub>3</sub>, 100 MHz) δ 169.1, 167.4, 146.6, 144.9, 135.9, 133.4, 129.8, 129.7, 129.5, 128.5, 128.4, 122.9, 63.4, 32.6, 30.1, 29.0, 27.8, 27.4, 26.0, 21.7;

HRMS (ESI) Calculated for C<sub>24</sub>H<sub>27</sub>O<sub>5</sub>NS<sup>+</sup> ([M+H]<sup>+</sup>): 464.15021, found: 464.14988.

### 2-cyclohexylidene-2-cyclopropyl-*N*-tosylacetamide (**4maa**)

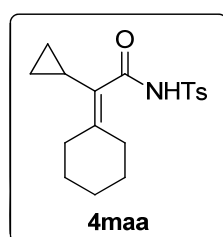

Following a general procedure: To a 25 ml oven-dried Schlenk tube was added Cu(NO<sub>3</sub>)<sub>2</sub> (0.05 mmol, 10.0 mol%, 9.4 mg), DCE (1.25 mL), ethynylcyclopropane **1m** (0.5 mmol, 33.0 mg), *p*-toluenesulfonyl azide **2a** (1.0 mmol, 197.0 mg), cyclohexanone

**3a** (1.0 mmol, 98.0 mg) and Me<sub>2</sub>Zn (0.75 mmol, 1.2 M in toluene, 0.625 mL) sequentially under nitrogen. The tube was sealed and stirred at room temperature for 6 h. After completion, the reaction mixture was diluted with ethyl acetate (5.0 mL) and filtered through a short pad silica gel washing with ethyl acetate (20 mL). The filtrate was concentrated and purified by silica gel column chromatography to provide the product **4maa** in 69% yield.

<sup>1</sup>H NMR (CDCl<sub>3</sub>, 400 MHz) δ 8.83 (s, 1H), 7.96 (d, *J* = 8.0 Hz, 2H), 7.34 (d, *J* = 8.0

Hz, 2H), 2.44 (s, 3H), 2.32-2.28 (m, 2H), 2.16-2.13 (m, 2H), 1.53-1.44 (m, 7H), 0.72-0.66 (m, 2H), 0.25-0.20 (m, 2H);

$^{13}\text{C}$  NMR ( $\text{CDCl}_3$ , 100 MHz)  $\delta$  167.6, 149.9, 145.0, 135.8, 129.5, 128.4, 126.6, 32.3, 30.9, 28.0, 27.5, 26.3, 21.7, 9.5, 6.9;

HRMS (ESI) Calculated for  $\text{C}_{18}\text{H}_{23}\text{O}_3\text{NS}^+$  ( $[\text{M}+\text{H}]^+$ ): 356.12909, found: 356.12887.

### 2-cyclohexylidene-*N*-tosyl-2-(trimethylsilyl)acetamide (4naa)

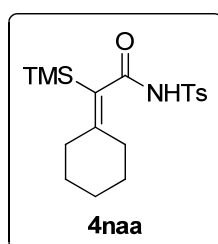

Following a general procedure: To a 25 ml oven-dried Schlenk tube was added  $\text{Cu}(\text{NO}_3)_2$  (0.05 mmol, 10.0 mol%, 9.4 mg), DCE (1.25 mL), ethynyltrimethylsilane **1n** (0.5 mmol, 49.0 mg), *p*-toluenesulfonyl azide **2a** (1.0 mmol, 197.0 mg), cyclohexanone **3a** (1.0 mmol, 98.0 mg) and  $\text{Me}_2\text{Zn}$  (0.75 mmol, 1.2 M in toluene, 0.625 mL) sequentially under nitrogen. The tube was sealed and stirred at room temperature for 6 h. After completion, the reaction mixture was diluted with ethyl acetate (5.0 mL) and filtered through a short pad silica gel washing with ethyl acetate (20 mL). The filtrate was concentrated and purified by silica gel column chromatography to provide the product **4naa** in 55% yield.

$^1\text{H}$  NMR ( $\text{CDCl}_3$ , 400 MHz)  $\delta$  8.78 (s, 1H), 8.05 (d,  $J = 8.0$  Hz, 2H), 7.42 (d,  $J = 8.0$  Hz, 2H), 2.53 (s, 3H), 2.25-2.23 (m, 2H), 2.08-2.06 (m, 2H), 1.64-1.61 (m, 6H), 0.15 (s, 9H);

$^{13}\text{C}$  NMR ( $\text{CDCl}_3$ , 100 MHz)  $\delta$  170.7, 158.5, 144.9, 135.9, 129.8, 129.4, 128.5, 34.7, 34.5, 28.3, 28.1, 25.9, 21.7, -0.23;

HRMS (ESI) Calculated for  $\text{C}_{18}\text{H}_{27}\text{O}_3\text{NSiNaS}^+$  ( $[\text{M}+\text{H}]^+$ ): 388.13731, found: 388.13690.

### 2-cyclohexylidene-2-phenyl-*N*-(phenylsulfonyl)acetamide (4aba)

Following a general procedure: To a 25 ml oven-dried Schlenk tube was added

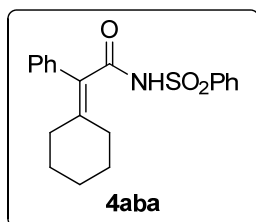

$\text{Cu}(\text{NO}_3)_2$  (0.025 mmol, 5.0 mol%, 4.7 mg), DCE (1.25 mL), phenylacetylene **1a** (0.5 mmol, 51.0 mg), benzenesulfonyl azide **2b** (1.0 mmol, 183.0 mg), cyclohexanone **3a** (1.0 mmol, 98.0 mg) and  $\text{Me}_2\text{Zn}$  (0.75 mmol, 1.2 M in toluene, 0.625 mL)

sequentially under nitrogen. The tube was sealed and stirred at room temperature for 6 h. After completion, the reaction mixture was diluted with ethyl acetate (5.0 mL) and filtered through a short pad silica gel washing with ethyl acetate (20 mL). The filtrate was concentrated and purified by silica gel column chromatography to provide the product **4aba** in 62% yield.

$^1\text{H NMR}$  ( $\text{CDCl}_3$ , 400 MHz)  $\delta$  8.01 (s, 1H), 7.97-9.94 (m, 2H), 7.65-7.61 (m, 1H), 7.53-7.49 (m, 2H), 7.34-7.28 (m, 3H), 7.06-7.02 (m, 2H), 2.47 (t,  $J = 6.0$  Hz, 2H), 2.01 (d,  $J = 6.0$  Hz, 2H), 1.62-1.59 (m, 2H), 1.54-1.48 (m, 4H);

$^{13}\text{C NMR}$  ( $\text{CDCl}_3$ , 100 MHz)  $\delta$  165.8, 154.4, 138.5, 135.8, 133.9, 129.6, 129.1, 128.9, 128.3, 128.2, 127.5, 32.8, 32.3, 28.3, 28.3, 26.1;

**HRMS (ESI)** Calculated for  $\text{C}_{20}\text{H}_{21}\text{O}_3\text{NS}^+$  ( $[\text{M}+\text{H}]^+$ ): 378.11344, found: 378.11327.

### 2-cyclohexylidene-*N*-(4-methoxyphenylsulfonyl)-2-phenylacetamide (**4aca**)

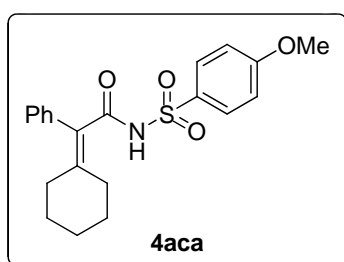

Following a general procedure: To a 25 ml oven-dried Schlenk tube was added  $\text{Cu}(\text{NO}_3)_2$  (0.05 mmol, 10.0 mol%, 9.4 mg), DCE (1.25 mL), phenylacetylene **1a** (0.5 mmol, 51.0 mg), 4-methoxy benzenesulfonyl azide **2c** (1.0 mmol, 213.0 mg), cyclohexanone **3a** (1.0 mmol, 98.0 mg) and  $\text{Me}_2\text{Zn}$  (0.75 mmol, 1.2 M in toluene, 0.625 mL) sequentially under nitrogen.

The tube was sealed and stirred at room temperature for 6 h. After completion, the reaction mixture was diluted with ethyl acetate (5.0 mL) and filtered through a short pad silica gel washing with ethyl acetate (20 mL). The filtrate was concentrated and purified by silica gel column chromatography to provide the product **4aca** in 66% yield.

**<sup>1</sup>H NMR (CDCl<sub>3</sub>, 400 MHz)** δ 8.03 (s, 1H), 7.89 (d, *J* = 8.8 Hz, 2H), 7.34-7.28 (m, 3H), 7.07-7.04 (m, 2H), 6.96 (d, *J* = 8.8 Hz, 2H), 3.86 (s, 3H), 2.48 (t, *J* = 6.0 Hz, 2H), 2.01 (t, *J* = 6.0 Hz, 2H), 1.63-1.60 (m, 2H), 1.55-1.48 (m, 4H);

**<sup>13</sup>C NMR (CDCl<sub>3</sub>, 100 MHz)** δ 165.9, 163.8, 153.8, 135.8, 130.7, 129.9, 129.6, 129.0, 128.1, 127.6, 114.0, 55.7, 32.7, 32.3, 28.3, 28.2, 26.1;

**HRMS (ESI)** Calculated for C<sub>21</sub>H<sub>23</sub>O<sub>4</sub>NS<sup>+</sup> ([M+H]<sup>+</sup>): 408.12400, found: 408.12379.

#### ***N*-(4-chlorophenylsulfonyl)-2-cyclohexylidene-2-phenylacetamide (4ada)**

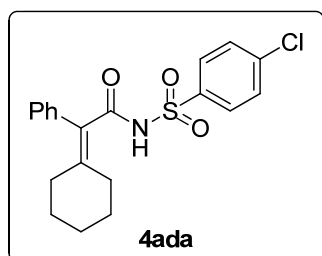

Following a general procedure: To a 25 ml oven-dried Schlenk tube was added Cu(NO<sub>3</sub>)<sub>2</sub> (0.025 mmol, 5.0 mol%, 4.7 mg), DCE (1.25 mL), phenylacetylene **1a** (0.5 mmol, 51.0 mg), 4-chlorobenzenesulfonyl azide **2d** (1.0 mmol, 217.0 mg), cyclohexanone **3a** (1.0 mmol, 98.0 mg) and Me<sub>2</sub>Zn (0.75 mmol, 1.2 M in toluene, 0.625 mL) sequentially under nitrogen. The tube was sealed and stirred at room temperature for 6 h. After completion, the reaction mixture was diluted with ethyl acetate (5.0 mL) and filtered through a short pad silica gel washing with ethyl acetate (20 mL). The filtrate was concentrated and purified by silica gel column chromatography to provide the product **4ada** in 53% yield.

**<sup>1</sup>H NMR (CDCl<sub>3</sub>, 400 MHz)** δ 7.92-7.87 (m, 3H), 7.51-7.46 (m, 2H), 7.37-7.31 (m, 3H), 7.07-7.03 (m, 2H), 2.54 (t, *J* = 5.6 Hz, 2H), 2.01 (t, *J* = 5.6 Hz, 2H), 1.65-1.61 (m, 2H), 1.56-1.49 (m, 4H);

**<sup>13</sup>C NMR (CDCl<sub>3</sub>, 100 MHz)** δ 165.6, 155.9, 140.5, 137.0, 135.9, 129.9, 129.7, 129.3, 129.2, 128.4, 127.2, 33.2, 32.3, 28.4, 28.4, 26.2;

**HRMS (ESI)** Calculated for C<sub>20</sub>H<sub>20</sub>O<sub>3</sub>NCINaS<sup>+</sup> ([M+H]<sup>+</sup>): 412.07446, found: 412.07416.

#### **2-cyclohexylidene-*N*-(naphthalen-2-ylsulfonyl)-2-phenylacetamide (4aea)**



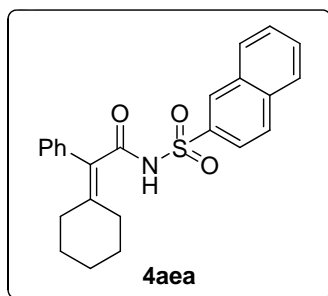

Following a general procedure: To a 25 ml oven-dried Schlenk tube was added  $\text{Cu}(\text{NO}_3)_2$  (0.025 mmol, 5.0 mol%, 4.7 mg), DCE (1.25 mL), phenylacetylene **1a** (0.5 mmol, 51.0 mg), naphthalene-2-sulfonyl azide **2e** (1.0 mmol, 233.0 mg), cyclohexanone **3a** (1.0 mmol, 98.0 mg) and  $\text{Me}_2\text{Zn}$  (0.75 mmol, 1.2 M in toluene, 0.625 mL) sequentially under nitrogen. The tube was sealed and stirred at room temperature for 6 h. After completion, the reaction mixture was diluted with ethyl acetate (5.0 mL) and filtered through a short pad silica gel washing with ethyl acetate (20 mL). The filtrate was concentrated and purified by silica gel column chromatography to provide the product **4aea** in 62% yield.

**$^1\text{H}$  NMR** ( $\text{CDCl}_3$ , 400 MHz)  $\delta$  8.60 (s, 1H), 8.12 (s, 1H), 7.97-7.84 (m, 4H), 7.65-7.58 (m, 2H), 7.28-7.25 (m, 3H), 7.05-7.02 (m, 2H), 2.47 (t,  $J = 6.0$  Hz, 2H), 1.98 (t,  $J = 5.6$  Hz, 2H), 1.59-1.57 (m, 2H), 1.51-1.46 (m, 4H);

**$^{13}\text{C}$  NMR** ( $\text{CDCl}_3$ , 100 MHz)  $\delta$  165.9, 154.5, 135.8, 135.4, 135.3, 131.9, 130.5, 129.6, 129.6, 129.4, 129.1, 129.1, 128.2, 127.9, 127.6, 127.5, 122.7, 32.8, 32.3, 28.3, 28.3, 26.1;

**HRMS (ESI)** Calculated for  $\text{C}_{24}\text{H}_{23}\text{O}_3\text{NS}^+$  ( $[\text{M}+\text{H}]^+$ ): 428.12909, found: 428.14468.

### 2-cyclohexylidene-N-(methylsulfonyl)-2-phenylacetamide (**4afa**)

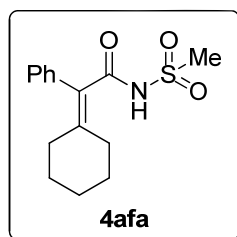

Following a general procedure: To a 25 ml oven-dried Schlenk tube was added  $\text{Cu}(\text{NO}_3)_2$  (0.05 mmol, 10.0 mol%, 9.4 mg), DCE (1.25 mL), phenylacetylene **1a** (0.5 mmol, 51.0 mg), methanesulfonyl azide **2f** (1.0 mmol, 120.0 mg), cyclohexanone **3a** (1.0 mmol, 98.0 mg) and  $\text{Me}_2\text{Zn}$  (0.75 mmol, 1.2 M in toluene, 0.625 mL) sequentially under nitrogen. The tube was sealed and stirred at room temperature for 6 h. After completion, the reaction mixture was diluted with ethyl acetate (5.0 mL) and filtered through a short pad silica gel washing with ethyl acetate (20 mL). The filtrate was concentrated and purified by silica gel column chromatography to provide the

product **4afa** in 45% yield.

**<sup>1</sup>H NMR (CDCl<sub>3</sub>, 400 MHz)** δ 7.64 (s, 1H), 7.43-7.33 (m, 3H), 7.21-7.18 (m, 2H), 3.25 (s, 3H), 2.72 (t, *J* = 6.0 Hz, 2H), 2.05 (t, *J* = 6.0 Hz, 2H), 1.77-1.70 (m, 2H), 1.63-1.52 (m, 4H);

**<sup>13</sup>C NMR (CDCl<sub>3</sub>, 100 MHz)** δ 166.8, 156.3, 136.1, 129.8, 129.4, 128.5, 127.2, 41.5, 33.4, 32.4, 28.5, 28.5, 26.3;

**HRMS (ESI)** Calculated for C<sub>15</sub>H<sub>19</sub>O<sub>3</sub>NS<sup>+</sup> ([M+H]<sup>+</sup>): 316.09779, found: 316.09764.

### 2-cyclobutylidene-2-phenyl-*N*-tosylacetamide (**4aab**)

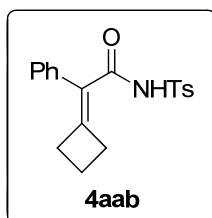

Following a general procedure: To a 25 ml oven-dried Schlenk tube was added Cu(NO<sub>3</sub>)<sub>2</sub> (0.025 mmol, 5.0 mol%, 4.7 mg), DCE (0.5 mL), phenylacetylene **1a** (0.5 mmol, 51.0 mg), *p*-toluenesulfonyl azide **2a** (1.0 mmol, 197.0 mg), cyclobutanone **3b** (1.0 mmol, 70.0 mg) and Me<sub>2</sub>Zn (0.75 mmol, 1.2 M in toluene, 0.625 mL) sequentially under nitrogen. The tube was sealed and stirred at room temperature for 6 h. After completion, the reaction mixture was diluted with ethyl acetate (5.0 mL) and filtered through a short pad silica gel washing with ethyl acetate (20 mL). The filtrate was concentrated and purified by silica gel column chromatography to provide the product **4aab** in 40% yield.

**<sup>1</sup>H NMR (CDCl<sub>3</sub>, 400 MHz)** δ 7.92 (d, *J* = 8.0 Hz, 2H), 7.74 (s, 1H), 7.42-7.31 (m, 5H), 7.13 (d, *J* = 7.6 Hz, 2H), 3.23 (t, *J* = 7.6 Hz, 2H), 2.63 (t, *J* = 7.6 Hz, 2H), 2.43 (s, 3H), 2.03 (m, 2H);

**<sup>13</sup>C NMR (CDCl<sub>3</sub>, 100 MHz)** δ 166.1, 162.9, 144.9, 135.9, 134.0, 129.6, 129.4, 129.3, 128.5, 128.5, 125.6, 34.3, 32.5, 21.7, 17.4;

**HRMS (ESI)** Calculated for C<sub>19</sub>H<sub>19</sub>O<sub>3</sub>NS<sup>+</sup> ([M+H]<sup>+</sup>): 364.09779, found: 364.09759.

### 2-cyclopentylidene-2-phenyl-*N*-tosylacetamide (**4aac**)

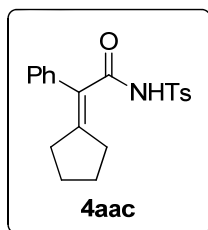

Following a general procedure: To a 25 ml oven-dried Schlenk tube was added  $\text{Cu}(\text{NO}_3)_2$  (0.025 mmol, 5.0 mol%, 4.7 mg), DCE (0.5 mL), phenylacetylene **1a** (0.5 mmol, 51.0 mg), *p*-toluenesulfonyl azide **2a** (1.0 mmol, 197.0 mg), cyclopentanone **3c** (1.0 mmol, 84.0 mg) and  $\text{Me}_2\text{Zn}$  (0.75 mmol, 1.2 M in toluene, 0.625 mL) sequentially under nitrogen. The tube was sealed and stirred at room temperature for 6 h. After completion, the reaction mixture was diluted with ethyl acetate (5.0 mL) and filtered through a short pad silica gel washing with ethyl acetate (20 mL). The filtrate was concentrated and purified by silica gel column chromatography to provide the product **4aac** in 73% yield.

**$^1\text{H}$  NMR ( $\text{CDCl}_3$ , 400 MHz)**  $\delta$  7.90 (d,  $J$  = 8.0 Hz, 2H), 7.60 (s, 1H), 7.44-7.35 (m, 3H), 7.32 (d,  $J$  = 8.4 Hz, 2H), 7.14-7.11 (m, 2H), 2.86 (t,  $J$  = 7.2 Hz, 2H), 2.43 (s, 3H), 2.07 (t,  $J$  = 7.2 Hz, 2H), 1.75-1.67 (m, 2H), 1.56-1.49 (m, 2H);

**$^{13}\text{C}$  NMR ( $\text{CDCl}_3$ , 100 MHz)**  $\delta$  168.0, 163.4, 144.7, 137.0, 136.0, 129.7, 129.5, 129.4, 128.6, 128.4, 124.9, 36.0, 34.4, 26.8, 25.5, 21.7;

**HRMS (ESI)** Calculated for  $\text{C}_{20}\text{H}_{21}\text{O}_3\text{NS}^+$  ( $[\text{M}+\text{H}]^+$ ): 378.11344, found: 378.11294.

### 2-cycloheptylidene-2-phenyl-N-tosylacetamide (**4aad**)

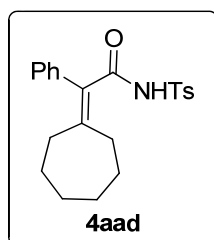

Following a general procedure: To a 25 ml oven-dried Schlenk tube was added  $\text{Cu}(\text{NO}_3)_2$  (0.025 mmol, 5.0 mol%, 4.7 mg), DCE (0.5 mL), phenylacetylene **1a** (0.5 mmol, 51.0 mg), *p*-toluenesulfonyl azide **2a** (1.0 mmol, 197.0 mg), cycloheptanone **3d** (1.0 mmol, 112.0 mg) and  $\text{Me}_2\text{Zn}$  (0.75 mmol, 1.2 M in toluene, 0.625 mL) sequentially under nitrogen. The tube was sealed and stirred at room temperature for 6 h. After completion, the reaction mixture was diluted with ethyl acetate (5.0 mL) and filtered through a short pad silica gel washing with ethyl acetate (20 mL). The filtrate was concentrated and purified by silica gel column chromatography to provide the product **4aad** in 73% yield.

**$^1\text{H}$  NMR ( $\text{CDCl}_3$ , 400 MHz)**  $\delta$  7.84 (d,  $J$  = 8.4 Hz, 2H), 7.79 (s, 1H), 7.38-7.28 (m,

5H), 7.08 (dd,  $J_1 = 8.0$  Hz,  $J_2 = 2.0$  Hz, 2H), 2.67 (t,  $J = 6.0$  Hz, 2H), 2.42 (s, 3H), 2.11-2.08 (m, 2H), 1.69-1.62 (m, 2H), 1.51-1.47 (m, 2H), 1.45-1.43 (m, 4H);

$^{13}\text{C}$  NMR ( $\text{CDCl}_3$ , 100 MHz)  $\delta$  164.9, 158.8, 144.7, 136.6, 135.8, 129.6, 129.4, 129.3, 129.2, 128.3, 128.3, 34.6, 33.6, 29.3, 28.6, 27.2, 26.9, 21.7;

HRMS(ESI) Calculated for  $\text{C}_{22}\text{H}_{25}\text{O}_3\text{NS}^+$  ( $[\text{M}+\text{H}]^+$ ): 406.14474, found: 406.14429.

### 2-cyclooctylidene-2-phenyl-*N*-tosylacetamide (4aae)

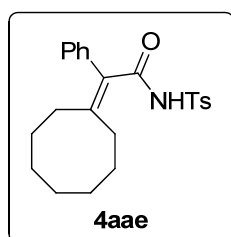

Following a general procedure: To a 25 ml oven-dried Schlenk tube was added  $\text{Cu}(\text{NO}_3)_2$  (0.025 mmol, 5.0 mol%, 4.7 mg), DCE (0.5 mL), phenylacetylene **1a** (0.5 mmol, 51.0 mg), *p*-toluenesulfonyl azide **2a** (1.0 mmol, 197.0 mg), cyclooctanone **3e** (1.0 mmol, 126.0 mg) and  $\text{Me}_2\text{Zn}$  (0.75 mmol, 1.2 M in toluene, 0.625 mL) sequentially under nitrogen. The tube was sealed and stirred at room temperature for 6 h. After completion, the reaction mixture was diluted with ethyl acetate (5.0 mL) and filtered through a short pad silica gel washing with ethyl acetate (20 mL). The filtrate was concentrated and purified by silica gel column chromatography to provide the product **4aae** in 64% yield.

$^1\text{H}$  NMR ( $\text{CDCl}_3$ , 400 MHz)  $\delta$  7.84 (d,  $J = 8.0$  Hz, 2H), 7.68(s, 1H), 7.41-7.34 (m, 3H), 7.30 (d,  $J = 8.0$  Hz, 2H), 7.10 (d,  $J = 7.6$  Hz, 2H), 2.65 (t,  $J = 6.0$  Hz, 2H), 2.42 (s, 3H), 2.04 (t,  $J = 6.0$  Hz, 2H), 1.79-1.73 (m, 2H), 1.51-1.37 (m, 8H);

$^{13}\text{C}$  NMR ( $\text{CDCl}_3$ , 100 MHz)  $\delta$  164.3, 161.6, 144.7, 137.1, 135.9, 129.5, 129.4, 128.3, 128.3, 128.2, 35.0, 31.9, 28.6, 27.5, 26.1, 25.9, 23.9, 21.7;

HRMS (ESI) Calculated for  $\text{C}_{23}\text{H}_{27}\text{O}_3\text{NS}^+$  ( $[\text{M}+\text{H}]^+$ ): 420.16039, found: 420.15991.

### 2-cyclododecylidene-2-phenyl-*N*-tosylacetamide (4aaf)

Following a general procedure: To a 25 ml oven-dried Schlenk tube was added  $\text{Cu}(\text{NO}_3)_2$  (0.025 mmol, 5.0 mol%, 4.7 mg), DCE (0.5 mL), phenylacetylene **1a** (0.5 mmol, 51.0 mg), *p*-toluenesulfonyl azide **2a** (1.0 mmol, 197.0 mg), cyclododecanone

**3f** (1.0 mmol, 182.0 mg) and Me<sub>2</sub>Zn (0.75 mmol, 1.2 M in toluene, 0.625 mL)

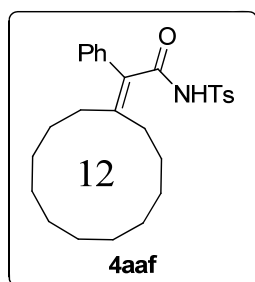

sequentially under nitrogen. The tube was sealed and stirred at room temperature for 6 h. After completion, the reaction mixture was diluted with ethyl acetate (5.0 mL) and filtered through a short pad silica gel washing with ethyl acetate (20 mL). The filtrate was concentrated and purified by silica gel column chromatography to provide the product **4aaf** in 37% yield.

**<sup>1</sup>H NMR (CDCl<sub>3</sub>, 400 MHz)** δ 7.84 (d, *J* = 8.0 Hz, 2H), 7.61(s, 1H), 7.37-7.34 (m, 3H), 7.31 (d, *J* = 8.0 Hz, 2H), 7.08-7.05 (m, 2H), 2.44 (s, 3H), 2.34 (t, *J* = 7.6 Hz, 2H), 1.87 (t, *J* = 7.6 Hz, 2H), 1.58-1.56 (m, 2H), 1.46-1.31 (m, 16H);

**<sup>13</sup>C NMR (CDCl<sub>3</sub>, 100 MHz)** δ 165.1, 156.9, 144.9, 136.6, 135.8, 130.9, 129.6, 129.5, 129.3, 128.5, 128.5, 29.9, 28.8, 26.4, 26.1, 24.2, 24.0, 22.6, 22.5, 22.0, 21.9, 21.8;

**HRMS (ESI)** Calculated for C<sub>27</sub>H<sub>36</sub>O<sub>3</sub>NS<sup>+</sup> ([M+H]<sup>+</sup>): 454.24104, found: 454.24100.

### 3-methyl-2-phenyl-*N*-tosylbut-2-enamide (**4aag**)

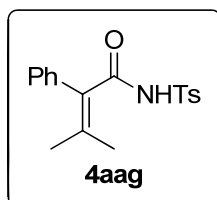

Following a general procedure: To a 25 ml oven-dried Schlenk tube was added Cu(NO<sub>3</sub>)<sub>2</sub> (0.025 mmol, 5.0 mol%, 4.7 mg), DCE (0.5 mL), phenylacetylene **1a** (0.5 mmol, 51.0 mg), *p*-toluenesulfonyl azide **2a** (1.0 mmol, 197.0 mg), acetone **3g** (1.0 mmol, 58.0 mg) and Me<sub>2</sub>Zn (0.75 mmol, 1.2 M in toluene, 0.625 mL) sequentially under nitrogen. The tube was sealed and stirred at room temperature for 6 h. After completion, the reaction mixture was diluted with ethyl acetate (5.0 mL) and filtered through a short pad silica gel washing with ethyl acetate (20 mL). The filtrate was concentrated and purified by silica gel column chromatography to provide the product **4aag** in 65% yield.

**<sup>1</sup>H NMR (CDCl<sub>3</sub>, 400 MHz)** δ 7.86 (d, *J* = 8.0 Hz, 2H), 7.83 (s, 1H), 7.37-7.29 (m, 5H), 7.07 (d, *J* = 8.0 Hz, 2H), 2.43 (s, 3H), 2.08 (s, 3H), 1.63 (s, 3H);

$^{13}\text{C}$  NMR ( $\text{CDCl}_3$ , 100 MHz)  $\delta$  165.1, 149.8, 144.8, 136.4, 135.7, 129.7, 129.5, 129.3, 128.4, 24.2, 22.7, 21.7;

HRMS(ESI) Calculated for  $\text{C}_{18}\text{H}_{19}\text{O}_3\text{NS}^+$  ( $[\text{M}+\text{H}]^+$ ): 352.09779, found: 352.09720.

**(Z)-3-methyl-2-phenyl-N-tosylhept-2-enamide (4aah) and (E)-3-methyl-2-phenyl-N-tosylhept-2-enamide (4aah')**

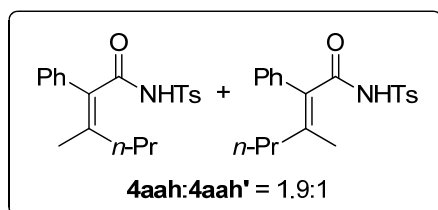

Following a general procedure: To a 25 ml oven-dried Schlenk tube was added  $\text{Cu}(\text{NO}_3)_2$  (0.025 mmol, 5.0 mol%, 4.7 mg), DCE (0.5 mL), phenylacetylene **1a** (0.5 mmol, 51.0 mg), *p*-toluenesulfonyl azide **2a** (1.0 mmol, 197.0 mg), pentan-2-one **3h** (1.0 mmol, 86.0 mg) and  $\text{Me}_2\text{Zn}$  (0.75 mmol, 1.2 M in toluene, 0.625 mL) sequentially under nitrogen. The tube was sealed and stirred at room temperature for 6 h. After completion, the reaction mixture was diluted with ethyl acetate (5.0 mL) and filtered through a short pad silica gel washing with ethyl acetate (20 mL). The filtrate was concentrated and purified by silica gel column chromatography to provide the products **4aah** and **4aah'** as two stereoisomers in 52% yield with the ratio being 1.9:1.

$^1\text{H}$  NMR ( $\text{CDCl}_3$ , 400 MHz)  $\delta$  7.91-7.84 (m, 3H), 7.37-7.29 (m, 5H), 7.07 (d,  $J = 6.4$  Hz, 2H), 2.43 (s, 3H), 2.32 (t,  $J = 7.6$  Hz, 1.35H), 2.06 (s, 1.07H), 1.86 (t,  $J = 7.6$  Hz, 0.75H), 1.61 (s, 1.98H), 1.51-1.41 (m, 1.44H), 1.40-1.29 (m, 0.80H), 0.85 (t,  $J = 7.2$  Hz, 2.07H), 0.71 (t,  $J = 7.2$  Hz, 1.11H);

$^{13}\text{C}$  NMR ( $\text{CDCl}_3$ , 100 MHz)  $\delta$  165.2, 165.1, 153.8, 151.4, 144.8, 136.4, 136.3, 135.7, 130.4, 129.7, 129.6, 129.5, 129.4, 129.3, 129.1, 128.4, 128.3, 128.2, 39.0, 37.5, 21.7, 21.5, 21.2, 21.0, 20.2, 14.0, 13.9;

HRMS (ESI) Calculated for  $\text{C}_{20}\text{H}_{23}\text{O}_3\text{NS}^+$  ( $[\text{M}+\text{H}]^+$ ): 380.12909, found: 380.12877.

**(E)-2,3-diphenyl-N-tosylbut-2-enamide (4aai)**

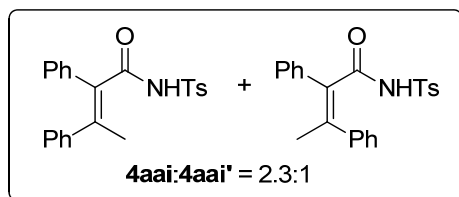

Following a general procedure: To a 25 ml oven-dried Schlenk tube was added  $\text{Cu}(\text{NO}_3)_2$  (0.025 mmol, 5.0 mol%, 4.7 mg), DCE (0.5 mL), phenylacetylene **1a** (0.5 mmol, 51.0 mg), *p*-toluenesulfonyl azide **2a** (1.0 mmol, 197.0 mg), acetophenone **3i** (1.0 mmol, 120.0 mg) and  $\text{Me}_2\text{Zn}$  (0.75 mmol, 1.2 M in toluene, 0.625 mL) sequentially under nitrogen. The tube was sealed and stirred at room temperature for 6 h. After completion, the reaction mixture was diluted with ethyl acetate (5.0 mL) and filtered through a short pad silica gel washing with ethyl acetate (20 mL). Detection of the reaction mixture by  $^1\text{H}$  NMR analysis showed that **4aai** and **4aai'** were formed as two stereoisomers of 2.3:1 ratio. The filtrate was concentrated and purified by silica gel column chromatography to provide the product **4aai** in 43% isolated yield.

Spectrogram of *E*-configured product **4aai**:

$^1\text{H}$  NMR ( $\text{CDCl}_3$ , 400 MHz)  $\delta$  7.93 (d,  $J = 8.0$  Hz, 2H), 7.74 (s, 1H), 7.37 (d,  $J = 8.0$  Hz, 2H), 7.16-7.10 (m, 6H), 7.94-7.90 (m, 2H), 6.82 (d,  $J = 6.8$  Hz, 2H), 2.48 (s, 3H), 2.36 (s, 3H);

$^{13}\text{C}$  NMR ( $\text{CDCl}_3$ , 100 MHz)  $\delta$  166.1, 149.8, 145.2, 141.9, 136.0, 135.7, 131.5, 130.4, 129.7, 128.9, 128.7, 128.3, 128.2, 127.6, 23.4, 21.9;

HRMS (ESI) Calculated for  $\text{C}_{23}\text{H}_{21}\text{O}_3\text{NS}^+$  ( $[\text{M}+\text{H}]^+$ ): 414.11344, found: 414.11286.

#### (*E*)-2,3-diphenyl-*N*-tosylacrylamide (**4aaj**)

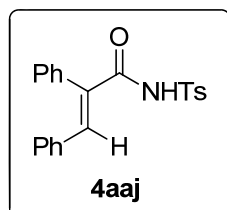

Following a general procedure: To a 25 ml oven-dried Schlenk tube was added  $\text{Cu}(\text{NO}_3)_2$  (0.025 mmol, 5.0 mol%, 4.7 mg), DCE (0.5 mL), phenylacetylene **1a** (0.5 mmol, 51.0 mg), *p*-toluenesulfonyl azide **2a** (1.0 mmol, 197.0 mg), benzaldehyde **3j** (1.0 mmol, 106.0 mg) and  $\text{Me}_2\text{Zn}$  (0.75 mmol, 1.2 M in toluene, 0.625 mL) sequentially under nitrogen. The tube was sealed and stirred at room temperature for 6 h. After completion, the reaction mixture was diluted with ethyl acetate (5.0 mL) and

filtered through a short pad silica gel washing with ethyl acetate (20 mL). The filtrate was concentrated and purified by silica gel column chromatography to provide the product **4aaj** in 47% yield.

<sup>1</sup>H NMR (CDCl<sub>3</sub>, 400 MHz) δ 7.96 (d, *J* = 8.0 Hz, 2H), 7.88 (s, 1H), 7.81 (s, 1H), 7.46 (s, 3H), 7.34 (d, *J* = 8.0 Hz, 2H), 7.21-7.17 (m, 3H), 7.11 (t, *J* = 7.2 Hz, 2H), 6.92 (t, *J* = 8.0 Hz, 2H), 2.43 (s, 3H);

<sup>13</sup>C NMR (CDCl<sub>3</sub>, 100 MHz) δ 164.2, 145.2, 141.3, 135.6, 134.2, 133.9, 131.8, 130.8, 130.3, 129.8, 129.8, 129.6, 129.6, 128.7, 128.4, 21.8;

HRMS (ESI) Calculated for C<sub>22</sub>H<sub>19</sub>O<sub>3</sub>NS<sup>+</sup> ([M+H]<sup>+</sup>): 400.09779, found: 400.09715.

#### (*E*)-2-phenyl-*N*-tosylhept-2-enamide (**4aak**)

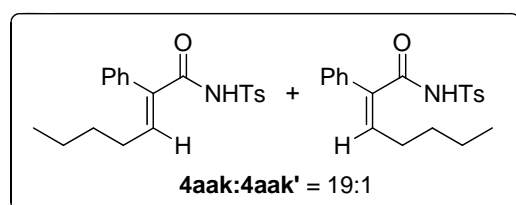

Following a general procedure: To a 25 ml oven-dried Schlenk tube was added Cu(NO<sub>3</sub>)<sub>2</sub> (0.025 mmol, 5.0 mol%, 4.7 mg), DCE (0.5 mL), phenylacetylene **1a** (0.5 mmol, 51.0 mg), *p*-toluenesulfonyl azide **2a** (1.0 mmol, 197.0 mg), pentanal **3k** (1.0 mmol, 86.0 mg) and Me<sub>2</sub>Zn (0.75 mmol, 1.2 M in toluene, 0.625 mL) sequentially under nitrogen. The tube was sealed and stirred at room temperature for 6 h. After completion, the reaction mixture was diluted with ethyl acetate (5.0 mL) and filtered through a short pad silica gel washing with ethyl acetate (20 mL). Detection of the reaction mixture by GC-MS showed that **4aak** and **4aak'** were formed as two stereoisomers of 19:1 ratio. The filtrate was concentrated and purified by silica gel column chromatography to provide the product **4aak** in 68% yield.

Spectrogram of *E*-configured product **4aak**:

<sup>1</sup>H NMR (CDCl<sub>3</sub>, 400 MHz) δ 7.93 (d, *J* = 8.0 Hz, 2H), 7.73 (s, 1H), 7.47-7.41 (m, 3H), 7.33 (d, *J* = 8.0 Hz, 2H), 7.12 (d, *J* = 6.8 Hz, 2H), 7.08 (t, *J* = 8.0 Hz, 1H), 2.44 (s, 3H), 1.95 (q, *J* = 7.2 Hz, 2H), 1.36-1.28 (m, 2H), 1.26-1.15 (m, 2H), 0.78 (t, *J* =



7.2 Hz, 3H);

<sup>13</sup>C NMR (CDCl<sub>3</sub>, 100 MHz) δ 163.6, 147.0, 145.1, 135.7, 133.7, 133.7, 129.8, 129.6, 129.6, 129.1, 128.7, 30.7, 29.4, 22.3, 21.8, 13.8;

HRMS (ESI) Calculated for C<sub>20</sub>H<sub>23</sub>O<sub>3</sub>NS<sup>+</sup> ([M+H]<sup>+</sup>): 380.12909, found: 380.12881.

#### (E)-2-(naphthalen-2-yl)-N-tosylhept-2-enamide (4hak)

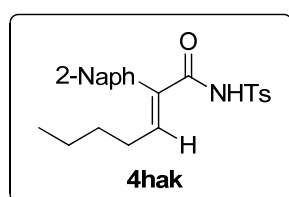

Following a general procedure: To a 25 ml oven-dried Schlenk tube was added Cu(NO<sub>3</sub>)<sub>2</sub> (0.05 mmol, 10.0 mol%, 9.4 mg), DCE (0.5 mL), 2-ethynynaphthalene **1h** (0.5 mmol, 76.0 mg), *p*-toluenesulfonyl azide **2a** (1.0 mmol, 197.0 mg), pentanal **3k** (1.0 mmol, 86.0 mg) and Me<sub>2</sub>Zn (0.75 mmol, 1.2 M in toluene, 0.625 mL) sequentially under nitrogen. The tube was sealed and stirred at room temperature for 6 h. After completion, the reaction mixture was diluted with ethyl acetate (5.0 mL) and filtered through a short pad silica gel washing with ethyl acetate (20 mL). The filtrate was concentrated and purified by silica gel column chromatography to provide the product **4hak** in 66% yield.

<sup>1</sup>H NMR (CDCl<sub>3</sub>, 400 MHz) δ 7.94 (s, 1H), 7.91-7.79 (m, 5H), 7.60 (s, 1H), 7.54-7.50 (m, 2H), 7.30 (d, *J* = 8.0 Hz, 2H), 7.18 (dd, *J*<sub>1</sub> = 8.4 Hz, *J*<sub>2</sub> = 1.2 Hz, 1H), 7.12 (t, *J* = 7.6 Hz, 1H), 2.41 (s, 3H), 1.97 (q, *J* = 7.6 Hz, 2H), 1.36-1.26 (m, 2H), 1.22-1.13 (m, 2H), 0.75 (t, *J* = 7.6 Hz, 3H);

<sup>13</sup>C NMR (CDCl<sub>3</sub>, 100 MHz) δ 163.7, 147.0, 145.0, 135.6, 133.8, 133.3, 133.1, 131.0, 129.5, 129.3, 129.2, 128.6, 128.1, 127.9, 127.0, 126.9, 126.9, 30.6, 29.4, 22.2, 21.7, 13.7;

HRMS (ESI) Calculated for C<sub>24</sub>H<sub>26</sub>O<sub>3</sub>NS<sup>+</sup> ([M+H]<sup>+</sup>): 408.16279, found: 408.16268.

#### (E)-2-phenyl-N-tosyltrideca-2,12-dienamide (4aal)

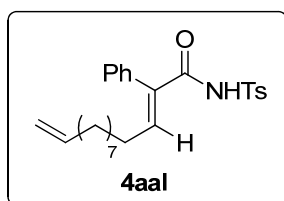

Following a general procedure: To a 25 ml oven-dried Schlenk tube was added  $\text{Cu}(\text{NO}_3)_2$  (0.025 mmol, 5.0 mol%, 4.7 mg), DCE (0.5 mL), phenylacetylene **1a** (0.5 mmol, 51.0 mg), *p*-toluenesulfonyl azide **2a** (1.0 mmol, 197.0 mg), undec-10-enal **3l** (1.0 mmol, 168.0 mg) and  $\text{Me}_2\text{Zn}$  (0.75 mmol, 1.2 M in toluene, 0.625 mL) sequentially under nitrogen. The tube was sealed and stirred at room temperature for 6 h. After completion, the reaction mixture was diluted with ethyl acetate (5.0 mL) and filtered through a short pad silica gel washing with ethyl acetate (20 mL). The filtrate was concentrated and purified by silica gel column chromatography to provide the product **4aal** in 65% yield.

**$^1\text{H}$  NMR** ( $\text{CDCl}_3$ , 400 MHz)  $\delta$  7.93 (d,  $J = 8.4$  Hz, 2H), 7.68 (s, 1H), 7.46-7.42 (m, 3H), 7.34 (d,  $J = 8.0$  Hz, 2H), 7.12 (dd,  $J_1 = 7.6$  Hz,  $J_2 = 1.6$  Hz, 2H), 7.08 (d,  $J = 8.0$  Hz, 1H), 5.84-5.73 (m, 1H), 4.97 (dq,  $J_1 = 17.2$  Hz,  $J_2 = 1.6$  Hz, 1H), 4.94-4.90 (m, 1H), 2.44 (s, 3H), 2.01 (q,  $J = 6.8$  Hz, 2H), 1.94 (d,  $J = 7.6$  Hz, 2H), 1.35-1.29 (m, 5H), 1.21-1.15 (m, 7H);

**$^{13}\text{C}$  NMR** ( $\text{CDCl}_3$ , 100 MHz)  $\delta$  163.6, 147.2, 145.2, 139.3, 135.7, 133.7, 129.8, 129.6, 129.6, 129.1, 128.8, 114.3, 33.9, 29.6, 29.4, 29.3, 29.2, 29.1, 29.0, 28.6, 21.8;

**HRMS (ESI)** Calculated for  $\text{C}_{26}\text{H}_{33}\text{O}_3\text{NS}^+$  ( $[\text{M}+\text{H}]^+$ ): 462.20734, found: 462.20715.

#### **(E)-13-bromo-2-phenyl-N-tosyltridec-2-enamide (4aam)**

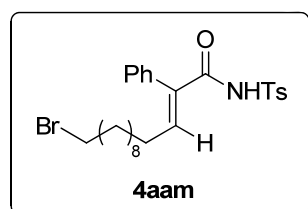

Following a general procedure: To a 25 ml oven-dried Schlenk tube was added  $\text{Cu}(\text{NO}_3)_2$  (0.025 mmol, 5.0 mol%, 4.7 mg), DCE (0.5 mL), phenylacetylene **1a** (0.5 mmol, 51.0 mg), *p*-toluenesulfonyl azide **2a** (1.0 mmol, 197.0 mg),

11-bromoundecanal **3m** (1.0 mmol, 248.0 mg) and  $\text{Me}_2\text{Zn}$  (0.75 mmol, 1.2 M in toluene, 0.625 mL) sequentially under nitrogen. The tube was sealed and stirred at room temperature for 6 h. After completion, the reaction mixture was diluted with ethyl acetate (5.0 mL) and filtered through a short pad silica gel washing with ethyl

acetate (20 mL). The filtrate was concentrated and purified by silica gel column chromatography to provide the product **4aam** in 75% yield.

**<sup>1</sup>H NMR (CDCl<sub>3</sub>, 400 MHz)** δ 7.93 (d, *J* = 8.4 Hz, 2H), 7.78 (br, 1H), 7.46-7.39 (m, 3H), 7.33 (d, *J* = 8.0 Hz, 2H), 7.12 (dd, *J*<sub>1</sub> = 8.0 Hz, *J*<sub>2</sub> = 1.6 Hz, 2H), 7.06 (d, *J* = 8.0 Hz, 1H), 3.38 (t, *J* = 6.8 Hz, 2H), 2.43 (s, 3H), 1.94 (q, *J* = 7.6 Hz, 2H), 1.82 (m, 2H), 1.43-1.36 (m, 2H), 1.35-1.31 (m, 2H), 1.27-1.15 (m, 10H);

**<sup>13</sup>C NMR (CDCl<sub>3</sub>, 100 MHz)** δ 163.5, 146.8, 145.0, 135.6, 133.8, 133.6, 129.7, 129.5, 129.4, 129.0, 128.6, 34.0, 32.8, 29.5, 29.3, 29.3, 29.2, 29.1, 28.7, 28.5, 28.1, 21.7;

**HRMS (ESI)** Calculated for C<sub>26</sub>H<sub>34</sub>O<sub>3</sub>BrNS<sup>+</sup> ([M+H]<sup>+</sup>): 542.13350, found: 542.13350.

**(6*R,E*)-6-((10*S*,13*R*)-10,13-dimethyl-3,12-dioxohexadecahydro-1*H*-cyclopenta[*a*]phenanthren-17-yl)-2-phenyl-*N*-tosylhept-2-enamide (4aan)**

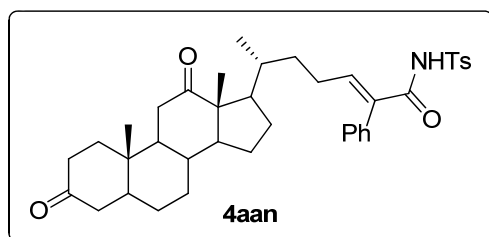

Following a general procedure: To a 25 ml oven-dried Schlenk tube was added Cu(NO<sub>3</sub>)<sub>2</sub> (0.025 mmol, 5.0 mol%, 4.7 mg), DCE (1.25 mL), phenylacetylene **1a** (0.5 mmol, 51.0 mg), *p*-toluenesulfonyl azide **2a** (1.0 mmol, 197.0 mg), (4*R*)-4-((10*S*,13*R*)-10,13-dimethyl-3,12-dioxohexadecahydro-1*H*-cyclopenta[*a*]phenanthren-17-yl)pentanal **3n** (1.0 mmol, 372.0 mg) and Me<sub>2</sub>Zn (0.75 mmol, 1.2 M in toluene, 0.625 mL) sequentially under nitrogen. The tube was sealed and stirred at room temperature for 6 h. After completion, the reaction mixture was diluted with ethyl acetate (5.0 mL) and filtered through a short pad silica gel washing with ethyl acetate (20 mL). The filtrate was concentrated and purified by silica gel column chromatography to provide the product **4aan** in 50% yield.

**<sup>1</sup>H NMR (CDCl<sub>3</sub>, 400 MHz)** δ 7.92 (d, *J* = 8.4 Hz, 2H), 7.84 (s, 1H), 7.47-7.40 (m, 3H), 7.33 (d, *J* = 8.0 Hz, 2H), 7.12 (dd, *J*<sub>1</sub> = 7.65 Hz, *J*<sub>2</sub> = 1.6 Hz, 2H), 7.06 (d, *J* = 8.0 Hz, 1H), 2.61-2.53 (m, 2H), 2.44 (s, 3H), 2.36-2.27 (m, 1H), 2.16 (d, *J* = 14.4 Hz,

1H), 2.08-1.99 (m, 3H), 1.95-1.82 (m, 8H), 1.79-1.66 (m, 2H), 1.59 (d,  $J = 12.0$  Hz, 1H), 1.49-1.27 (m, 5H), 1.18-1.09 (m, 6H), 0.99 (s, 3H), 0.66 (d,  $J = 6.0$  Hz, 3H);

**$^{13}\text{C}$  NMR (CDCl<sub>3</sub>, 100 MHz)**  $\delta$  214.2, 212.2, 163.6, 147.0, 145.0, 135.6, 133.7, 133.6, 129.7, 129.6, 129.5, 129.0, 128.6, 58.5, 57.6, 46.5, 44.3, 43.7, 42.1, 38.4, 36.9, 36.8, 35.7, 35.6, 35.4, 34.2, 27.5, 26.6, 26.6, 25.5, 24.3, 22.1, 21.7, 18.5, 11.8;

**HRMS (ESI)** Calculated for C<sub>39</sub>H<sub>49</sub>O<sub>5</sub>NS<sup>+</sup> ([M+H]<sup>+</sup>): 666.32237, found: 666.32208.

### 3. Mechanism Studies

To elucidate the possible reaction mechanism, a series of stoichiometric experiments was conducted. First, With either  $\text{Cu}(\text{NO}_3)_2$  or  $\text{Me}_2\text{Zn}$ , the reaction of phenylacetylene **1a**, *p*-toluenesulfonyl azide **2a** couldn't take place. When  $\text{Cu}(\text{NO}_3)_2$  and  $\text{Me}_2\text{Zn}$  were used together, 1-sulfonyltriazole **5aa** was obtained in 15% NMR yield after work up.

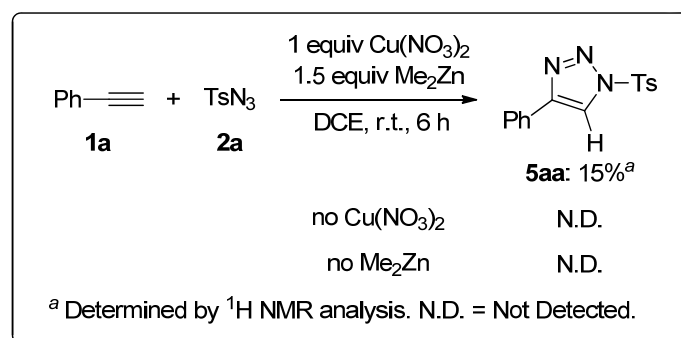

#### Experimental procedure:

$\text{Cu}(\text{NO}_3)_2$  (0.2 mmol, 37.5 mg) was added into an oven-dried reaction vessel with Teflon screw cap under a nitrogen atmosphere. DCE (0.2 mL), phenylacetylene **1a** (0.2 mmol, 20.4 mg), *p*-toluenesulfonyl azide **2a** (0.4 mmol, 78.8 mg) and  $\text{Me}_2\text{Zn}$  (0.3 mmol, 1.2 M in toluene, 0.25 mL) were then injected into the reaction tube. The reaction mixture was stirred at room temperature for 6 h. After the completion, the mixture was diluted with ethyl acetate (20 mL) and filtered through a short pad of silica gel. The solvent was removed by rotary evaporation and the residue was detected by crude  $^1\text{H}$  NMR and GC analysis.

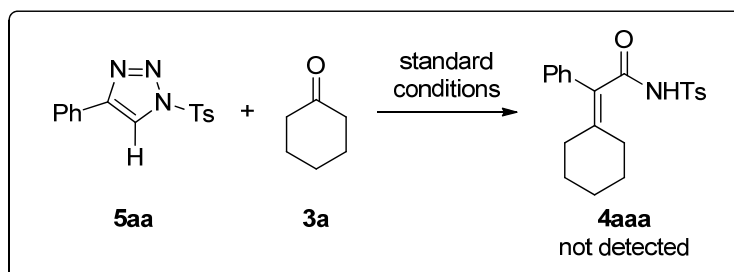

Next, the reaction of cyclohexanone **3a** and 1-sulfonyltriazole **5aa** was carried out under the standard conditions. However, no expected three-component product **4aaa**

was detected, which indicated 1-sulfonyltriazole **5aa** was not a reaction intermediate in the three-component reaction.

### Experimental procedure:

Cu(NO<sub>3</sub>)<sub>2</sub> (0.01 mmol, 1.9 mg) and 1-sulfonyltriazole **5aa** (0.2 mmol, 59.8 mg) was added into an oven-dried reaction vessel with Teflon screw cap under a nitrogen atmosphere. DCE (0.2 mL), cyclohexanone **3a** (0.4 mmol, 39.2 mg) and Me<sub>2</sub>Zn (0.3 mmol, 1.2 M in toluene, 0.25 mL) were then injected into the reaction tube. The reaction mixture was stirred at room temperature for 6 h. After the completion, the mixture was diluted with ethyl acetate (20 mL) and filtered through a short pad of silica gel. The solvent was removed by rotary evaporation and the residue was detected by crude <sup>1</sup>H NMR and GC analysis.

Next, we hypothesized a reactive 5-metalated-1-sulfonyltriazole intermediate must be involved. When 1-sulfonyltriazole **5aa** was treated with *n*-BuLi, the product **4aaa** was obtained in 58% NMR yield.<sup>7</sup>

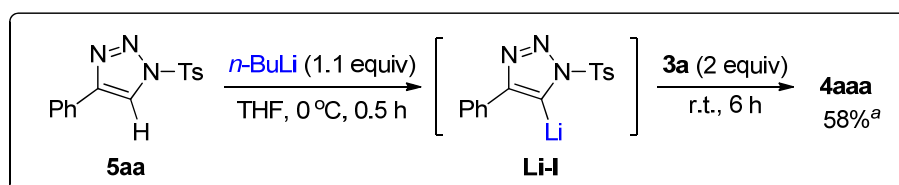

### Experimental procedure:

To a stirred solution of 1-sulfonyltriazole **5aa** (0.2 mmol, 59.8 mg) in THF (1.0 mL) was added *n*-BuLi (0.22 mmol, 2.5 M in THF, 0.088 mL) at 0 °C under a nitrogen atmosphere. After stirring for 0.5 h, cyclohexanone **3a** (0.4 mmol, 39.2 mg) was then injected into the reaction tube at 0 °C. The reaction mixture was stirred at room temperature for 6 h. After the completion, the mixture was diluted with ethyl acetate (20 mL) and filtered through a short pad of silica gel. The solvent was removed by rotary evaporation and the yield of **4aaa** was determined by <sup>1</sup>H NMR analysis of the crude product using 1,3,5-trimethoxybenzene as an internal standard.

To ascertain the key metal species, organozinc or organocopper species was prepared through Li-Zn/Li-Cu exchange and then treated with **3a**. When

(1-sulfonyl-4-phenyltriazol-5-yl)lithium intermediate **Li-I** was treated with CuBr, ZnI<sub>2</sub>, or Me<sub>2</sub>Zn, **4aaa** was detected by <sup>1</sup>H NMR analysis in 38%, 10%, and 30% yield, respectively. In contrast, reacting lithium intermediate **Li-I** with Cu(NO<sub>3</sub>)<sub>2</sub> could not produce any product.

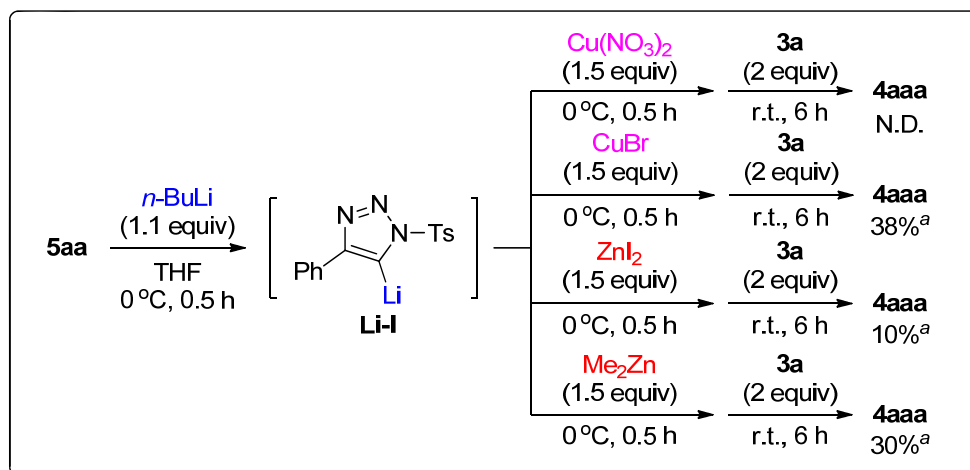

#### Experimental procedure:

To a stirred solution of 1-sulfonyltriazole **5aa** (0.2 mmol, 59.8 mg) in THF (1.0 mL) was added *n*-BuLi (0.22 mmol, 2.5 M in THF, 0.088 mL) at 0 °C under a nitrogen atmosphere. After stirring for 0.5 h, Cu(NO<sub>3</sub>)<sub>2</sub> (0.3 mmol, 56.1 mg, in 1 mL THF) or CuBr (0.3 mmol, 42.6 mg, in 1 mL THF) or ZnI<sub>2</sub> (0.3 mmol, 95.1 mg) or Me<sub>2</sub>Zn (0.3 mmol, 1.2 M in toluene, 0.25 mL) was added into the tube and stirred for another 0.5 h. Then cyclohexanone **3a** (0.4 mmol, 39.2 mg) was added. The reaction mixture was stirred at room temperature for 6 h. After the completion, the mixture was diluted with ethyl acetate (20 mL) and filtered through a short pad of silica gel. The solvent was removed by rotary evaporation and the yield of **4aaa** was determined by <sup>1</sup>H NMR analysis of the crude product using 1,3,5-trimethoxybenzene as an internal standard.

## 4. X-Ray Crystallography Data for 4aai and 4hak

The deposition number for **4aai** at the Cambridge Crystallographic Data Centre is CCDC 1444389.

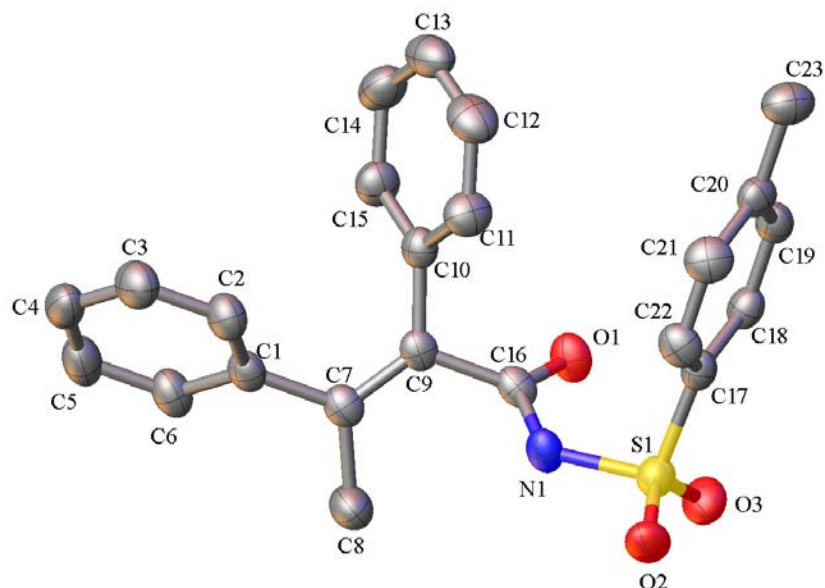

**Figure S1.** Ortep drawing of compound **4aai** with 50% ellipsoids

**Table S2.** Crystal data and structure refinement for **4aai**.

|                                 |                                                    |                 |
|---------------------------------|----------------------------------------------------|-----------------|
| Identification code             | <b>4aai</b>                                        |                 |
| Empirical formula               | C <sub>23</sub> H <sub>21</sub> N O <sub>3</sub> S |                 |
| Formula weight                  | 391.47                                             |                 |
| Temperature                     | 173.1500 K                                         |                 |
| Wavelength                      | 0.71073 Å                                          |                 |
| Crystal system                  | Monoclinic                                         |                 |
| Space group                     | P 1 21/n 1                                         |                 |
| Unit cell dimensions            | a = 9.710(3) Å                                     | α = 90°.        |
|                                 | b = 19.200(5) Å                                    | β = 97.104(4)°. |
|                                 | c = 22.065(6) Å                                    | γ = 90°.        |
| Volume                          | 4082.2(19) Å <sup>3</sup>                          |                 |
| Z                               | 8                                                  |                 |
| Density (calculated)            | 1.274 Mg/m <sup>3</sup>                            |                 |
| Absorption coefficient          | 0.182 mm <sup>-1</sup>                             |                 |
| F(000)                          | 1648                                               |                 |
| Crystal size                    | 0.51 x 0.1 x 0.08 mm <sup>3</sup>                  |                 |
| Theta range for data collection | 1.860 to 27.486°.                                  |                 |
| Index ranges                    | -11 ≤ h ≤ 12, -24 ≤ k ≤ 22, -28 ≤ l ≤ 28           |                 |



|                                   |                                             |
|-----------------------------------|---------------------------------------------|
| Reflections collected             | 29405                                       |
| Independent reflections           | 9326 [R(int) = 0.0647]                      |
| Completeness to theta = 25.242°   | 99.8 %                                      |
| Absorption correction             | Semi-empirical from equivalents             |
| Max. and min. transmission        | 1.0000 and 0.6963                           |
| Refinement method                 | Full-matrix least-squares on F <sup>2</sup> |
| Data / restraints / parameters    | 9326 / 0 / 509                              |
| Goodness-of-fit on F <sup>2</sup> | 1.197                                       |
| Final R indices [I>2sigma(I)]     | R1 = 0.0870, wR2 = 0.1337                   |
| R indices (all data)              | R1 = 0.1116, wR2 = 0.1429                   |
| Extinction coefficient            | n/a                                         |
| Largest diff. peak and hole       | 0.249 and -0.282 e.Å <sup>-3</sup>          |

The deposition number for **4hak** at the Cambridge Crystallographic Data Centre is CCDC 1444390.

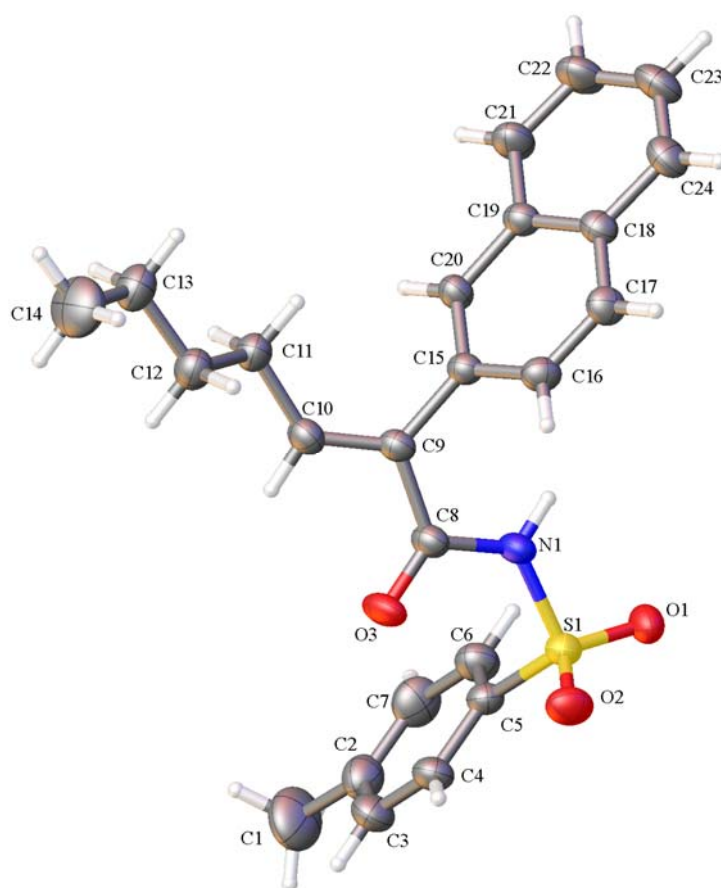

**Figure S2.** Ortep drawing of compound **4hak** with 50% ellipsoids

**Table S3.** Crystal data and structure refinement for **4hak**.

|                                   |                                                    |                 |
|-----------------------------------|----------------------------------------------------|-----------------|
| Identification code               | <b>4hak</b>                                        |                 |
| Empirical formula                 | C <sub>24</sub> H <sub>25</sub> N O <sub>3</sub> S |                 |
| Formula weight                    | 407.51                                             |                 |
| Temperature                       | 298.1500 K                                         |                 |
| Wavelength                        | 0.71073 Å                                          |                 |
| Crystal system                    | Triclinic                                          |                 |
| Space group                       | P -1                                               |                 |
| Unit cell dimensions              | a = 9.3077(19) Å                                   | α = 116.41(3)°. |
|                                   | b = 11.580(2) Å                                    | β = 100.50(3)°. |
|                                   | c = 11.683(2) Å                                    | γ = 90.85(3)°.  |
| Volume                            | 1102.3(5) Å <sup>3</sup>                           |                 |
| Z                                 | 2                                                  |                 |
| Density (calculated)              | 1.228 Mg/m <sup>3</sup>                            |                 |
| Absorption coefficient            | 0.171 mm <sup>-1</sup>                             |                 |
| F(000)                            | 432                                                |                 |
| Crystal size                      | 0.24 x 0.21 x 0.17 mm <sup>3</sup>                 |                 |
| Theta range for data collection   | 2.664 to 27.498°.                                  |                 |
| Index ranges                      | -12 ≤ h ≤ 12, -14 ≤ k ≤ 15, -15 ≤ l ≤ 15           |                 |
| Reflections collected             | 9421                                               |                 |
| Independent reflections           | 4952 [R(int) = 0.0329]                             |                 |
| Completeness to theta = 26.000°   | 98.4 %                                             |                 |
| Absorption correction             | Semi-empirical from equivalents                    |                 |
| Max. and min. transmission        | 1.0000 and 0.7857                                  |                 |
| Refinement method                 | Full-matrix least-squares on F <sup>2</sup>        |                 |
| Data / restraints / parameters    | 4952 / 0 / 264                                     |                 |
| Goodness-of-fit on F <sup>2</sup> | 1.129                                              |                 |
| Final R indices [I > 2σ(I)]       | R1 = 0.0627, wR2 = 0.1408                          |                 |
| R indices (all data)              | R1 = 0.0809, wR2 = 0.1520                          |                 |
| Extinction coefficient            | n/a                                                |                 |
| Largest diff. peak and hole       | 0.165 and -0.245 e.Å <sup>-3</sup>                 |                 |

## 5. References

1. E. Merkul, F. Klukas, D. Dorsch, U. Gradler, H. E. Greiner and T. J. J. Muller, *Org. Biomol. Chem.*, 2011, **9**, 5129.
2. B. Zhou, H. Chen and C. Wang, *J. Am. Chem. Soc.*, 2013, **135**, 1264.
3. Y. Xing, G. Sheng, J. Wang, P. Lu and Y. Wang, *Org. Lett.*, 2014, **16**, 1244.
4. B. Zhou, Y. Hu and C. Wang, *Angew. Chem. Int. Ed.*, 2015, **54**, 13659.
5. V. C. Edelsztein, P. H. Di Chenna and G. Burton, *Tetrahedron*, 2009, **65**, 3615.
6. K. Wang, X. Bi, S. Xing, P. Liao, Z. Fang, X. Meng, Q. Zhang, Q. Liu and Y. Ji, *Green Chemistry*, 2011, **13**, 562.
7. E. J. Yoo, M. Ahlquist, I. Bae, K. B. Sharpless, V. V. Fokin and S. Chang, *J. Org. Chem.*, 2008, **73**, 5520.

## 6. $^1\text{H}$ NMR, $^{13}\text{C}$ NMR, and $^{19}\text{F}$ NMR Spectra

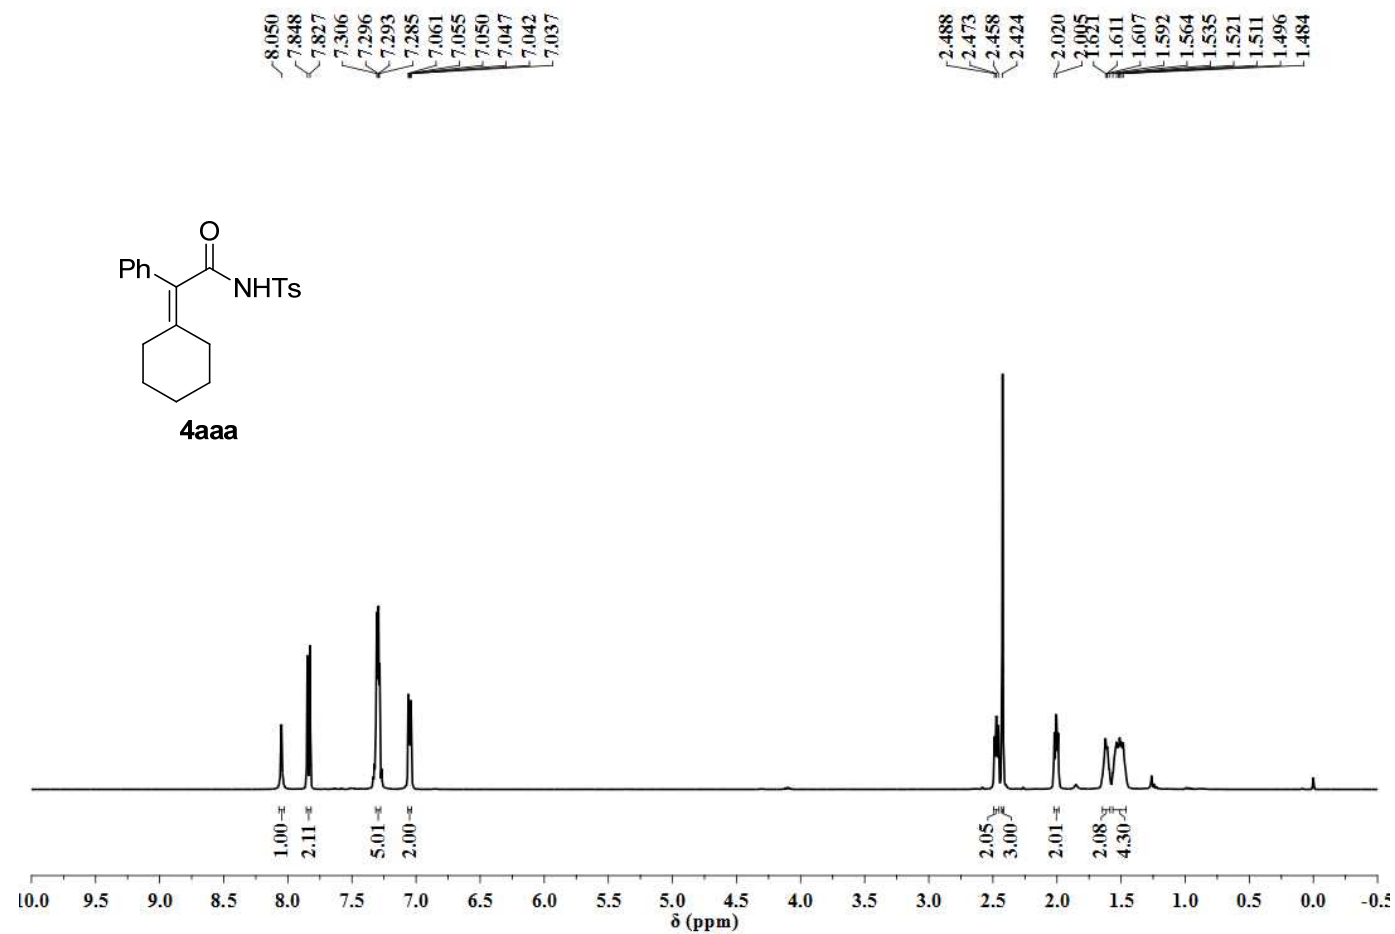

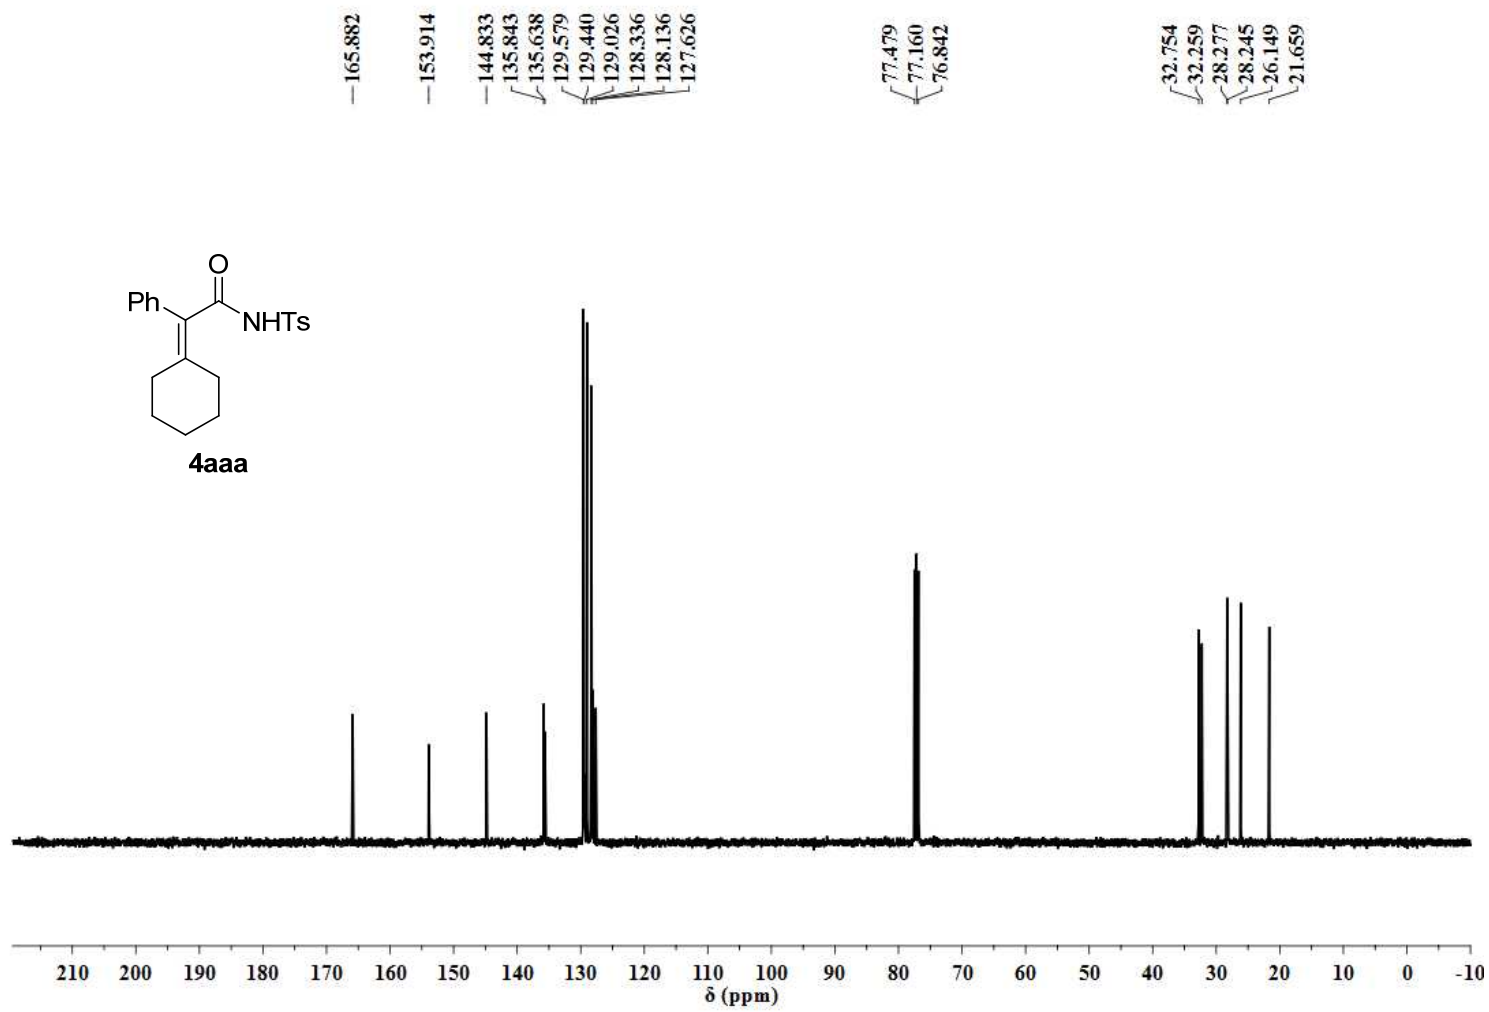

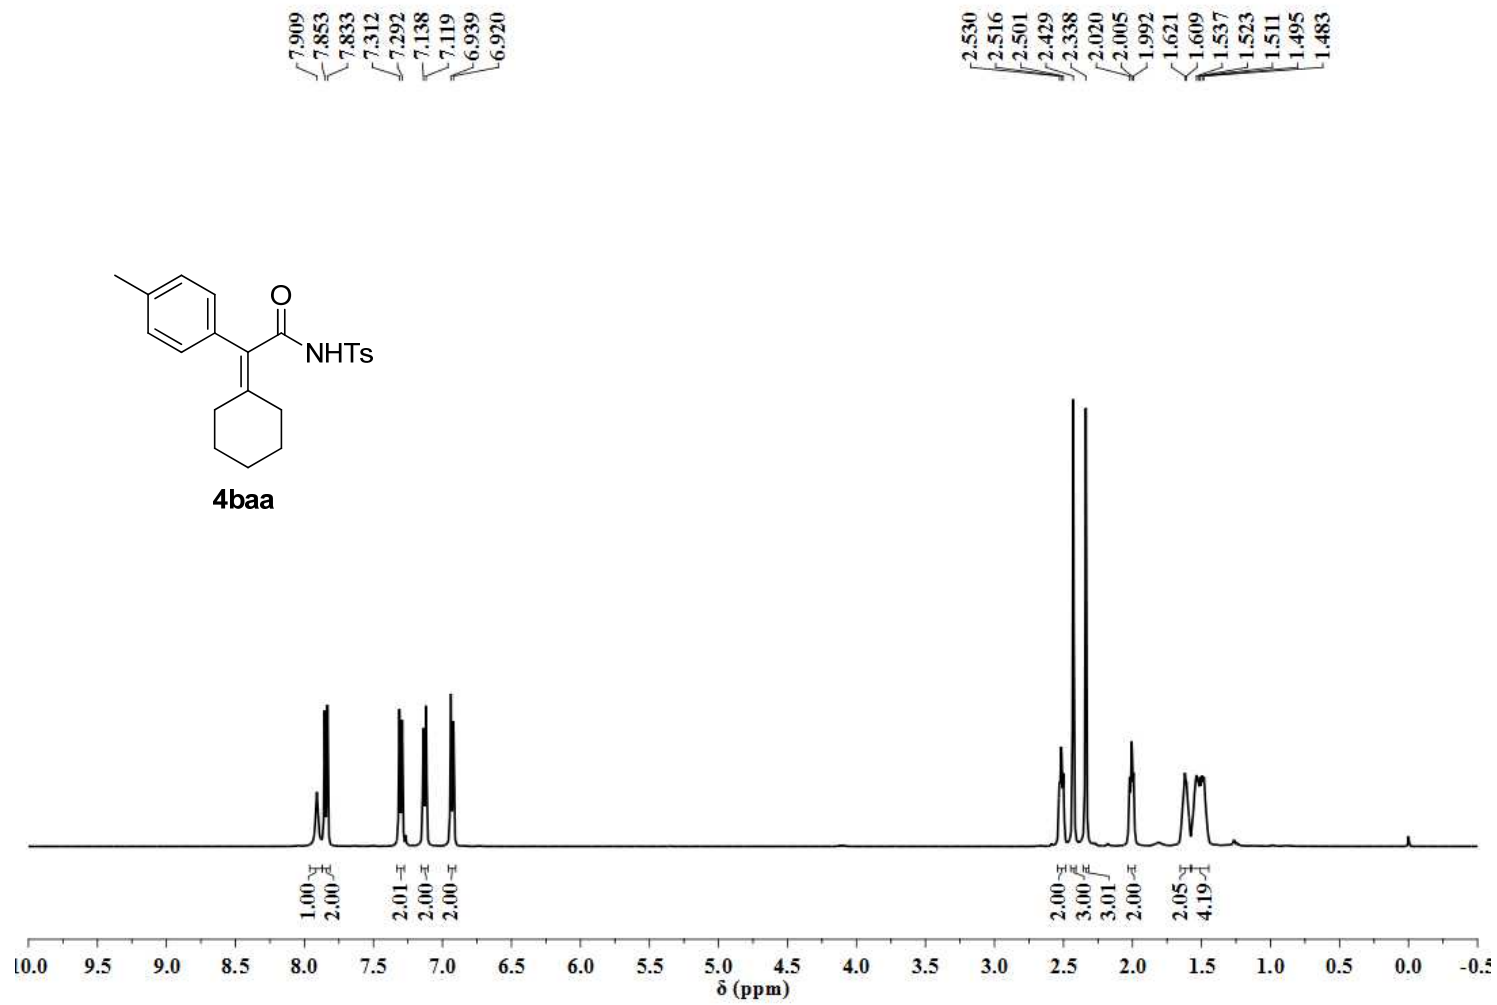

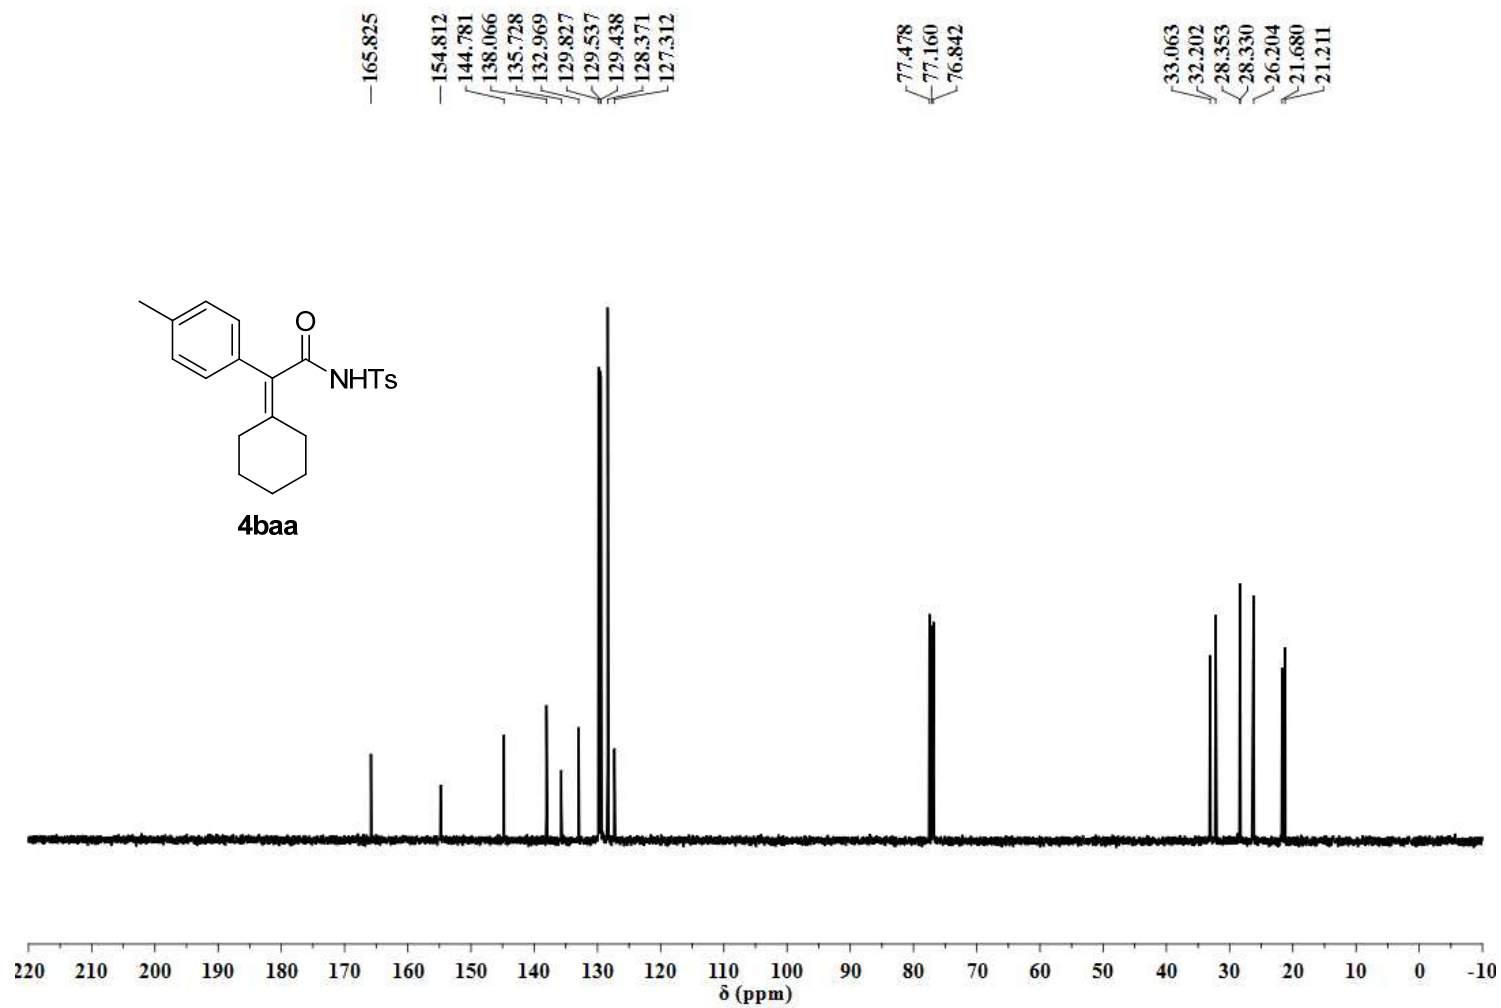

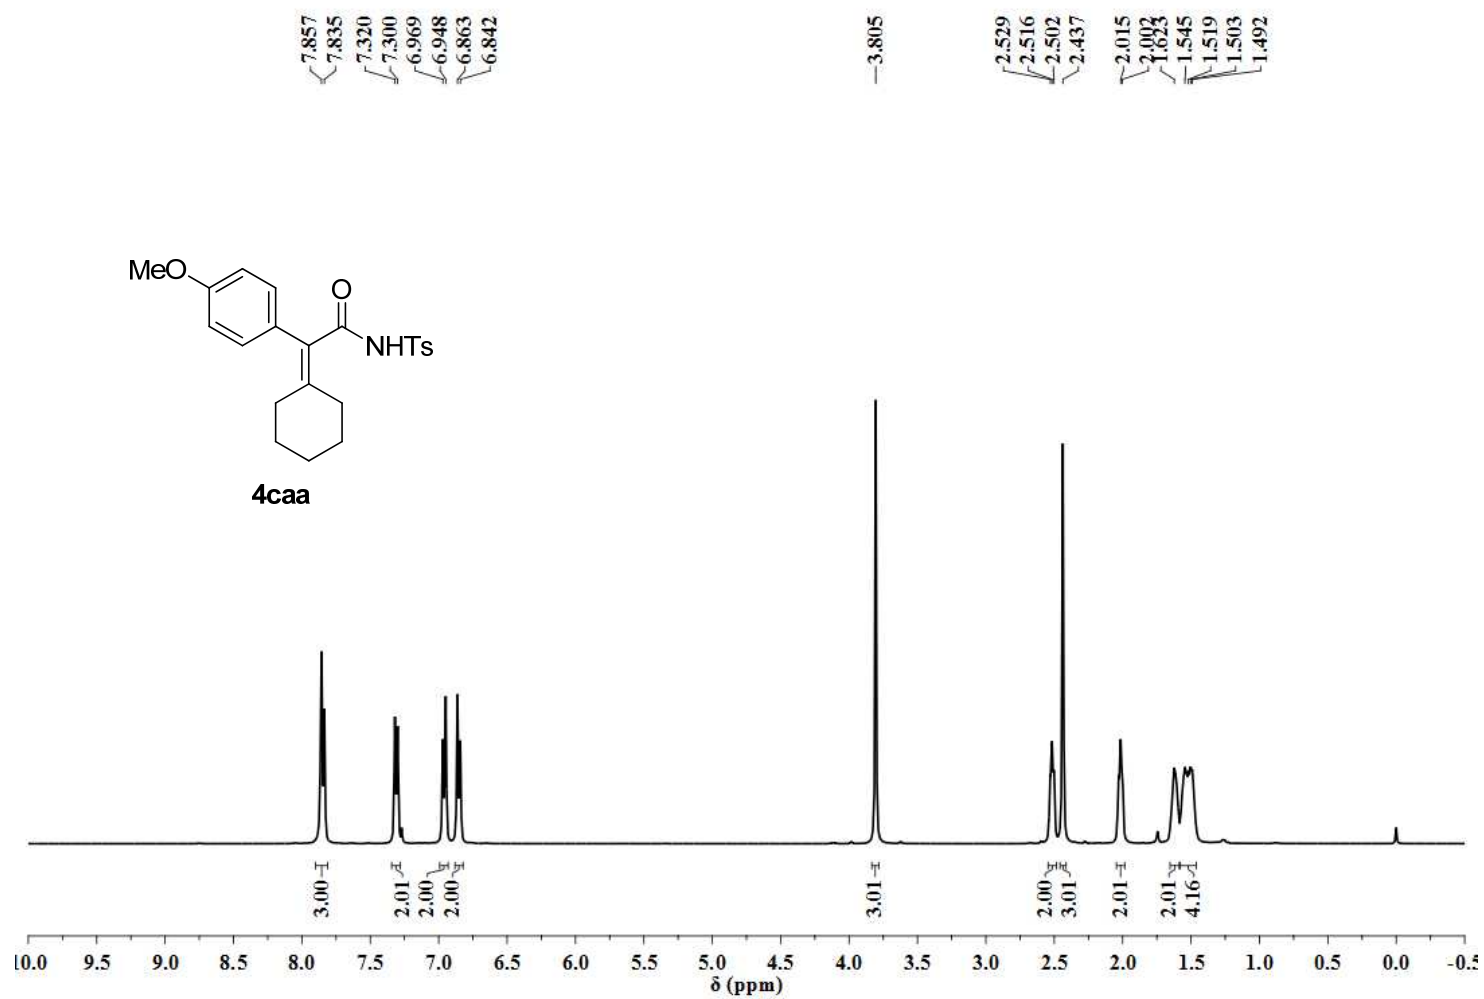



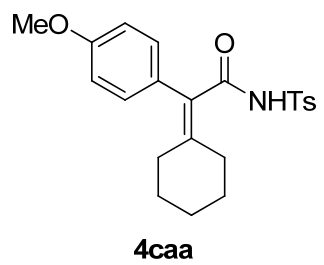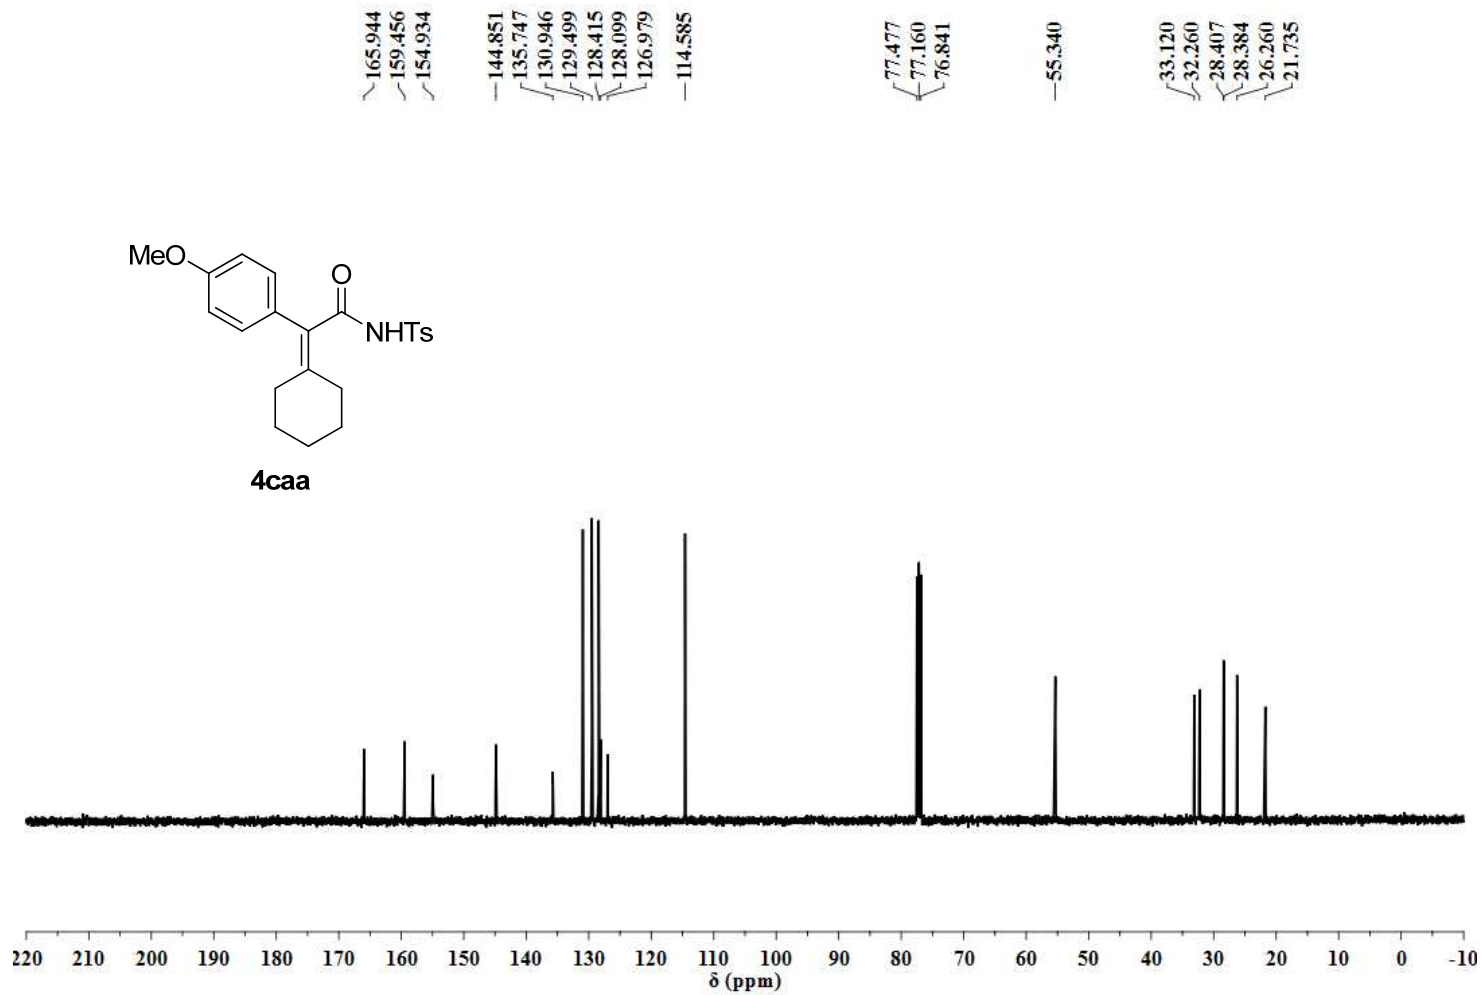

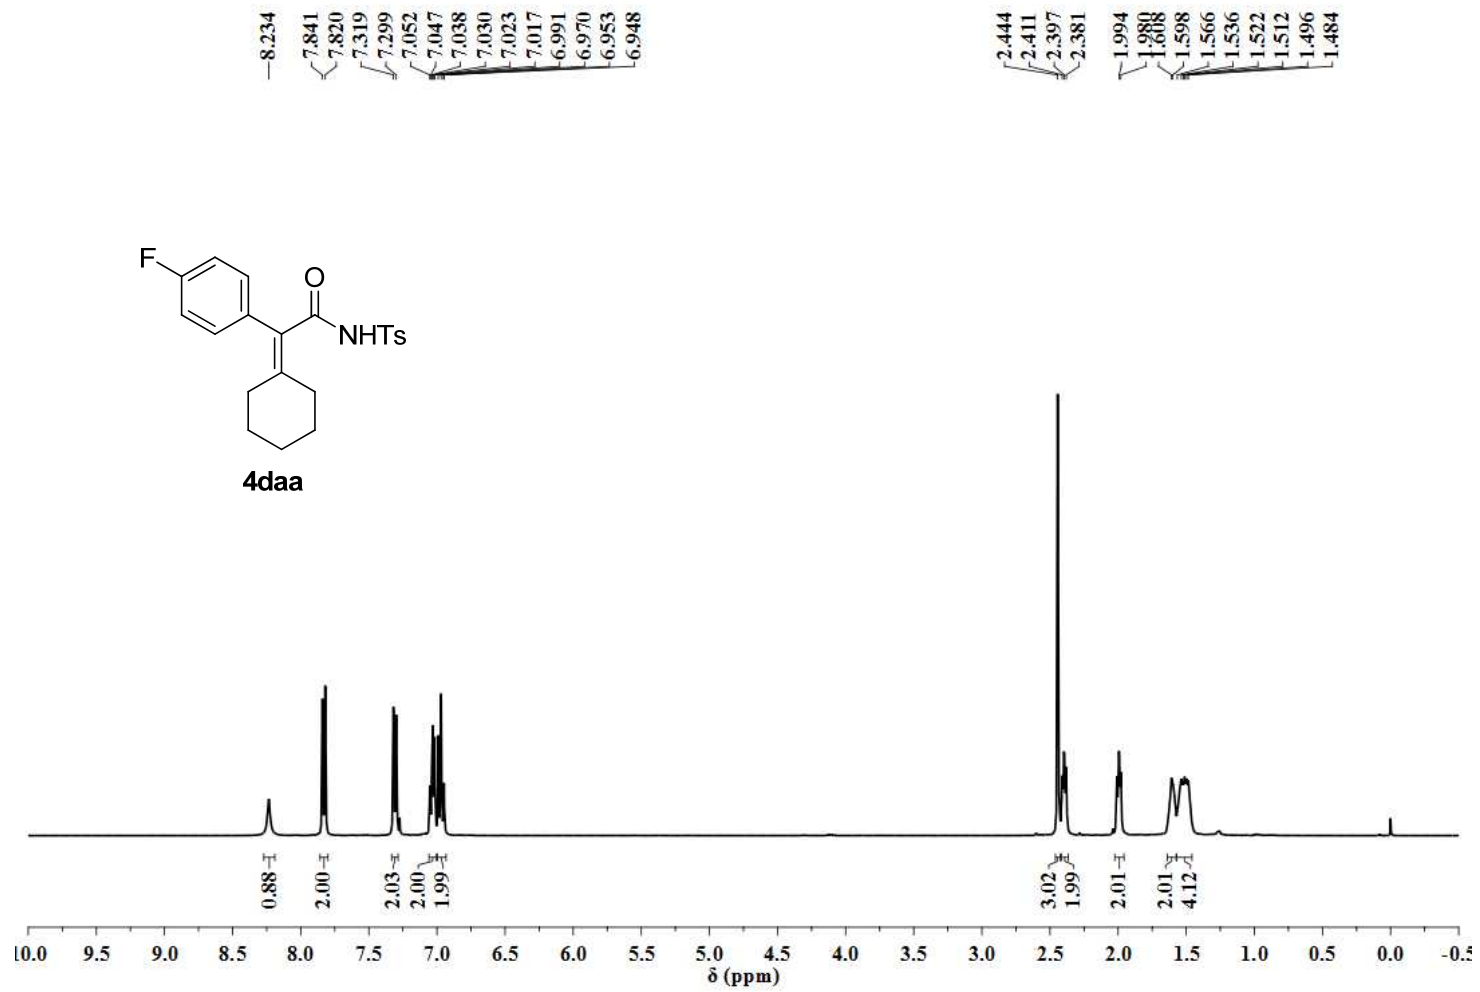

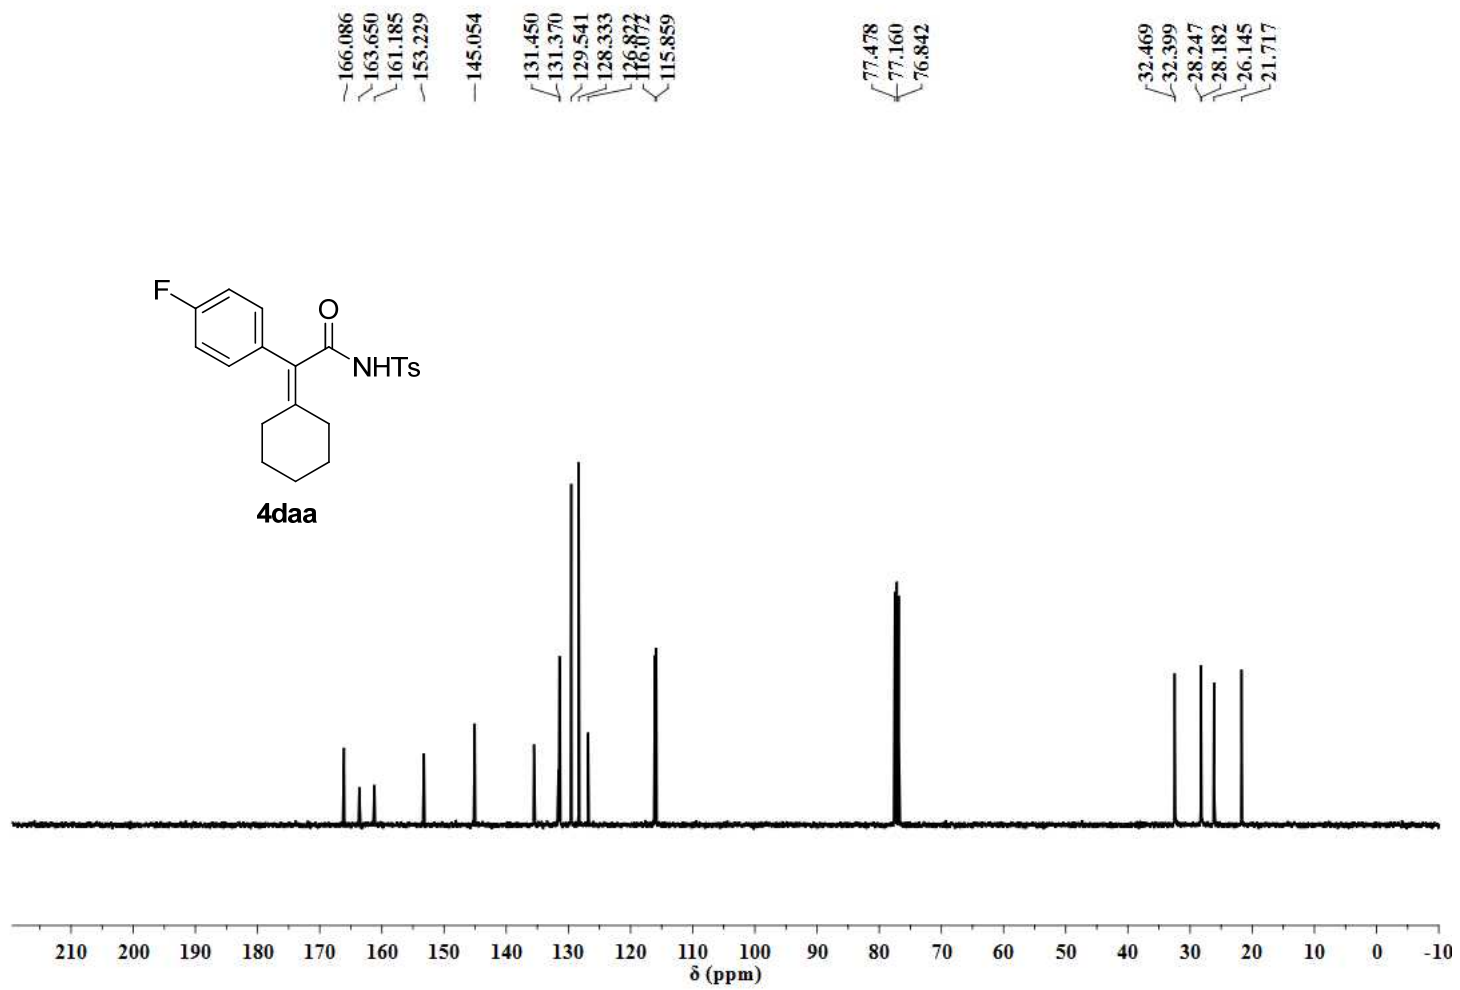

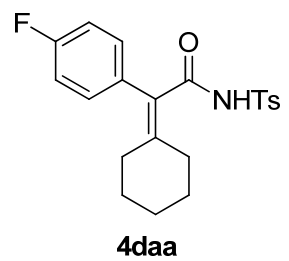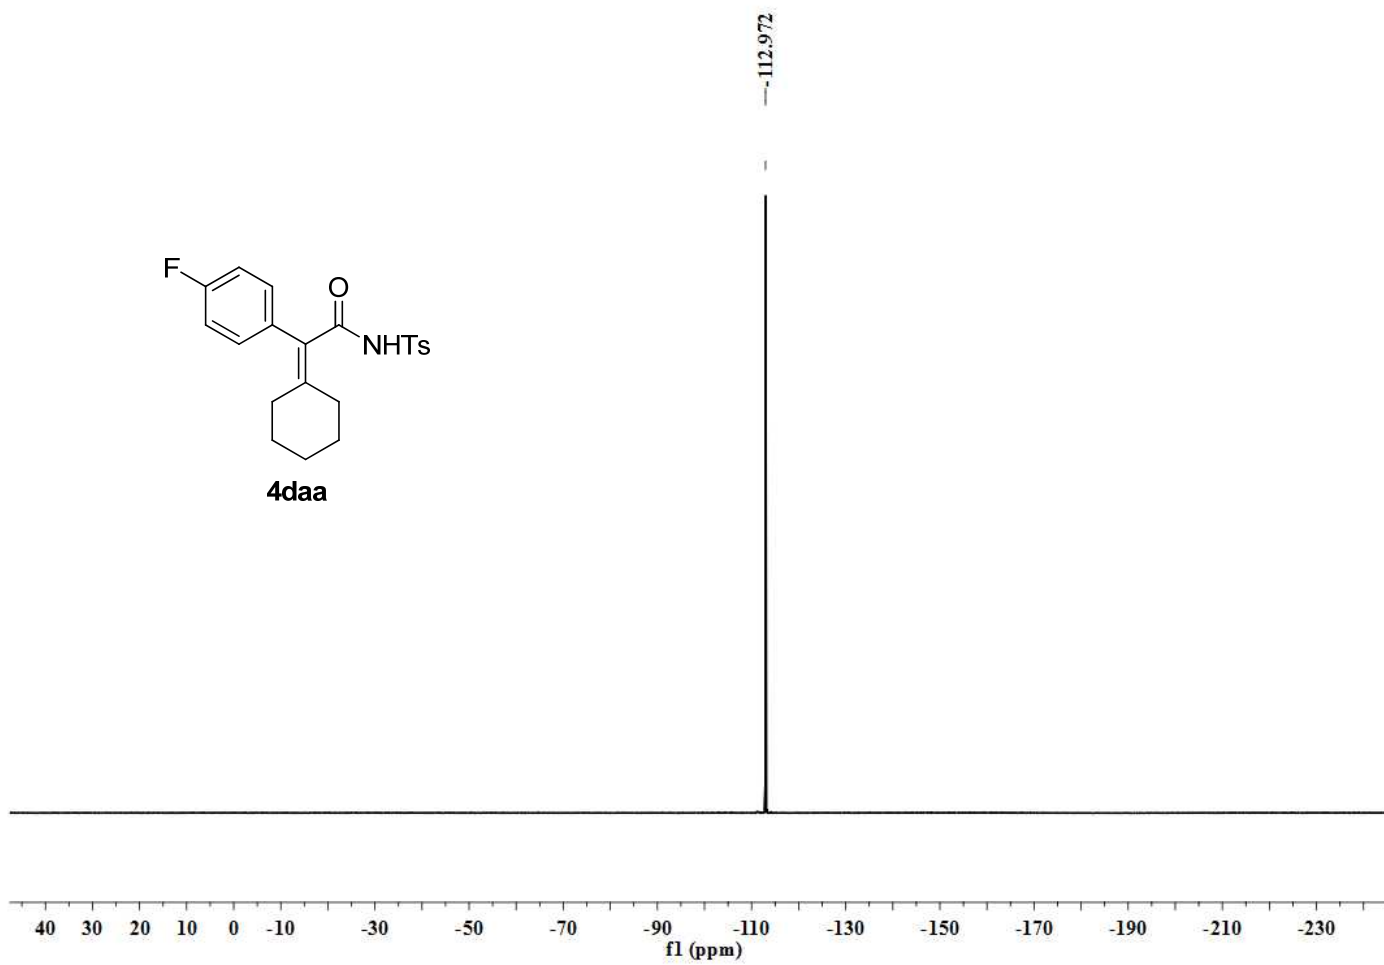

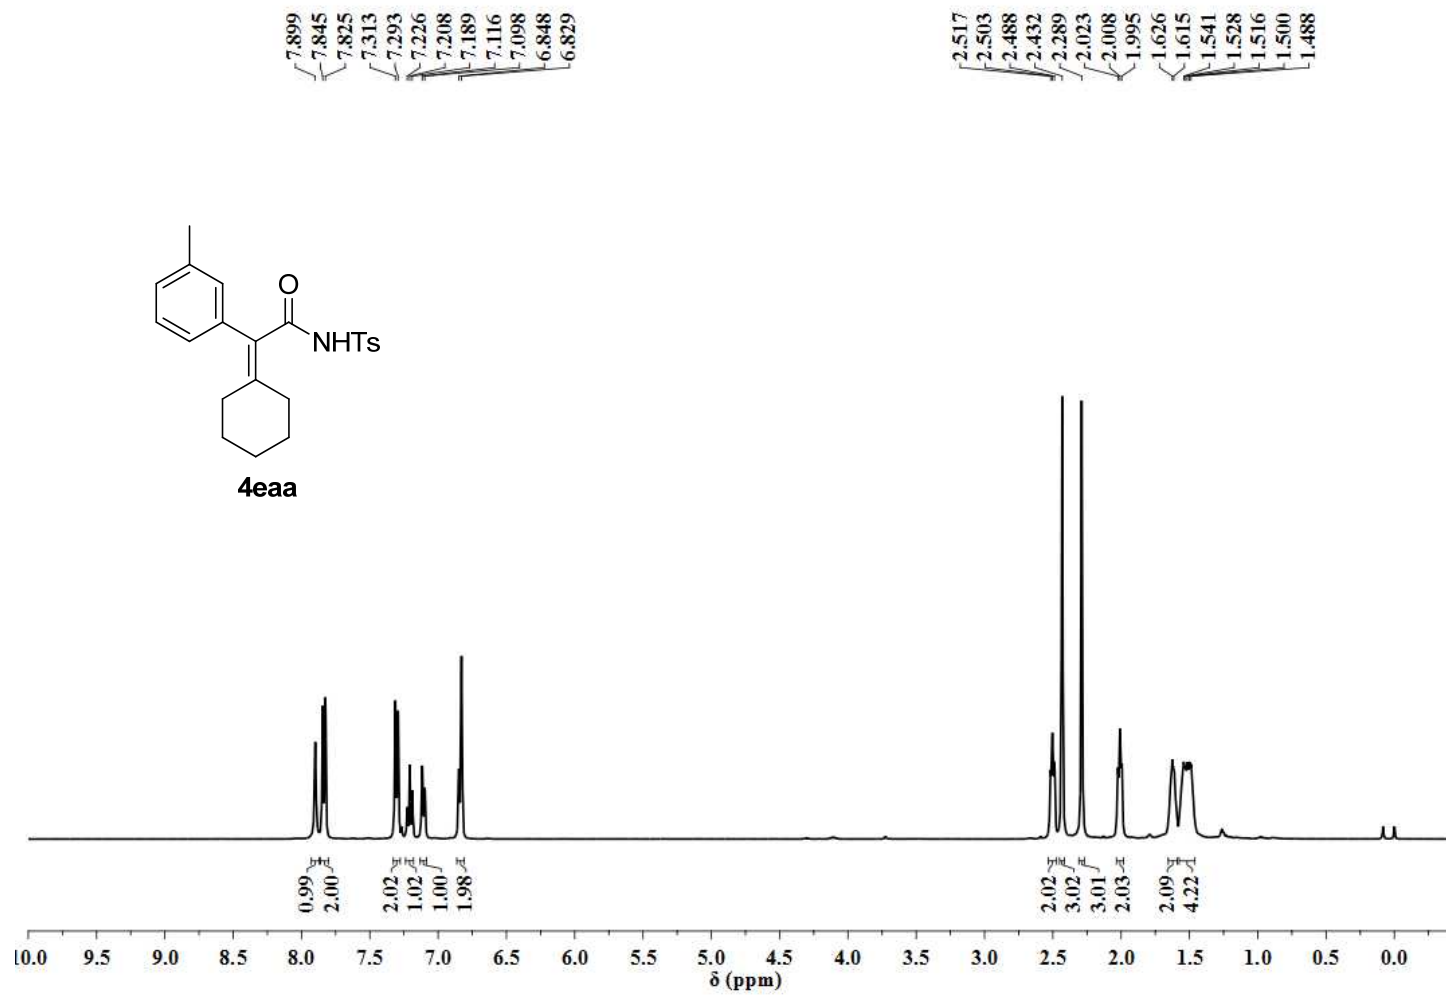

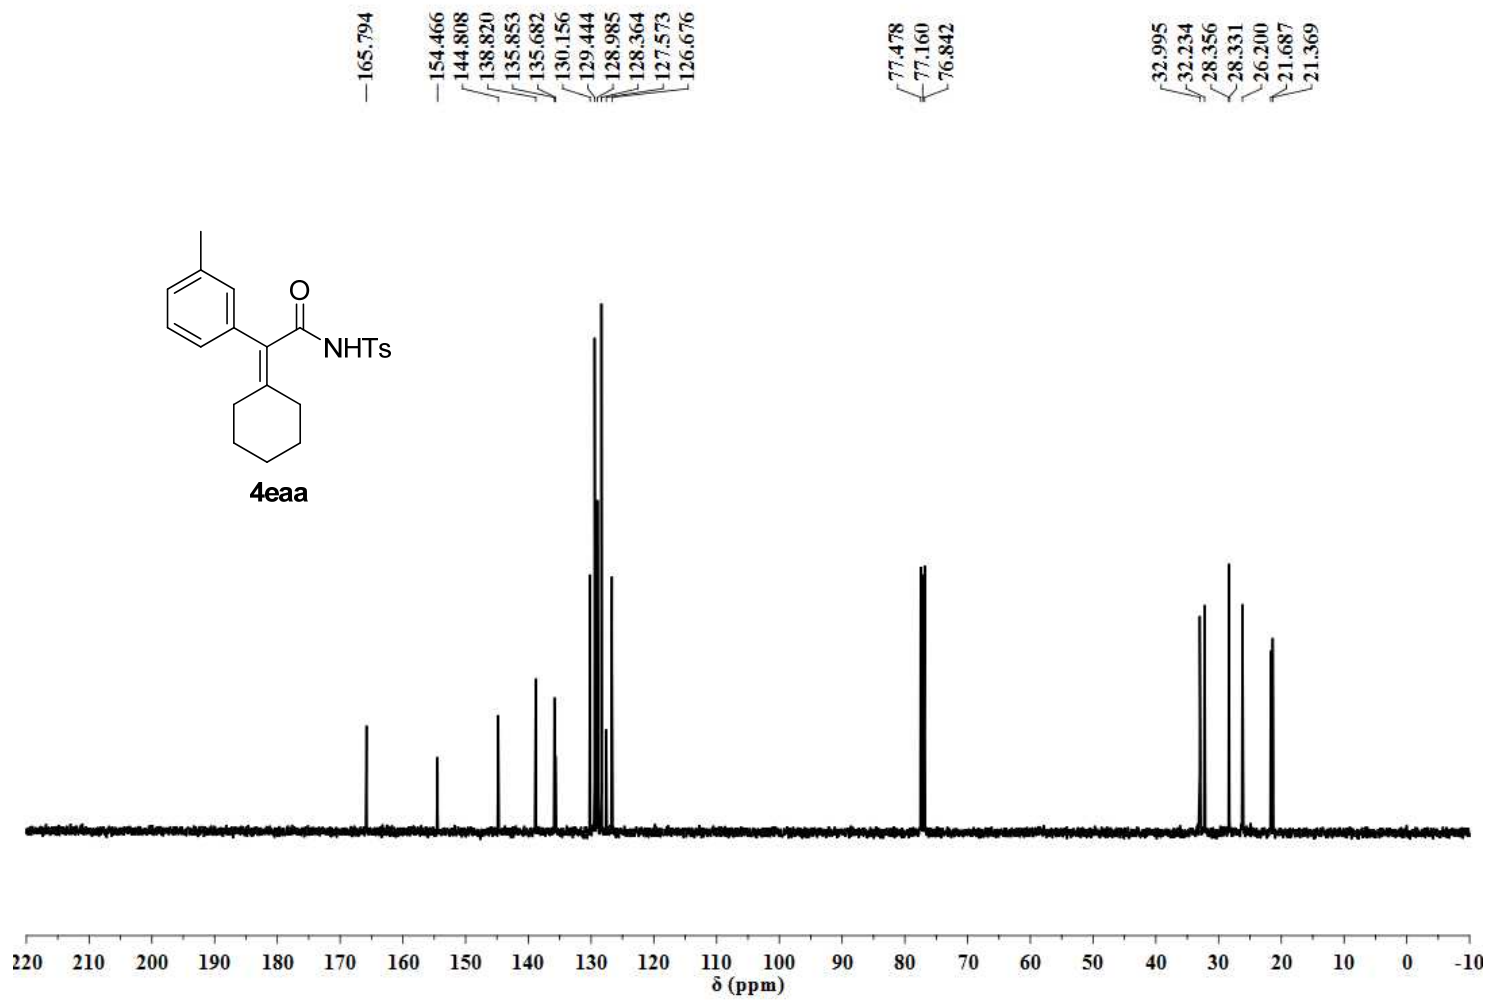

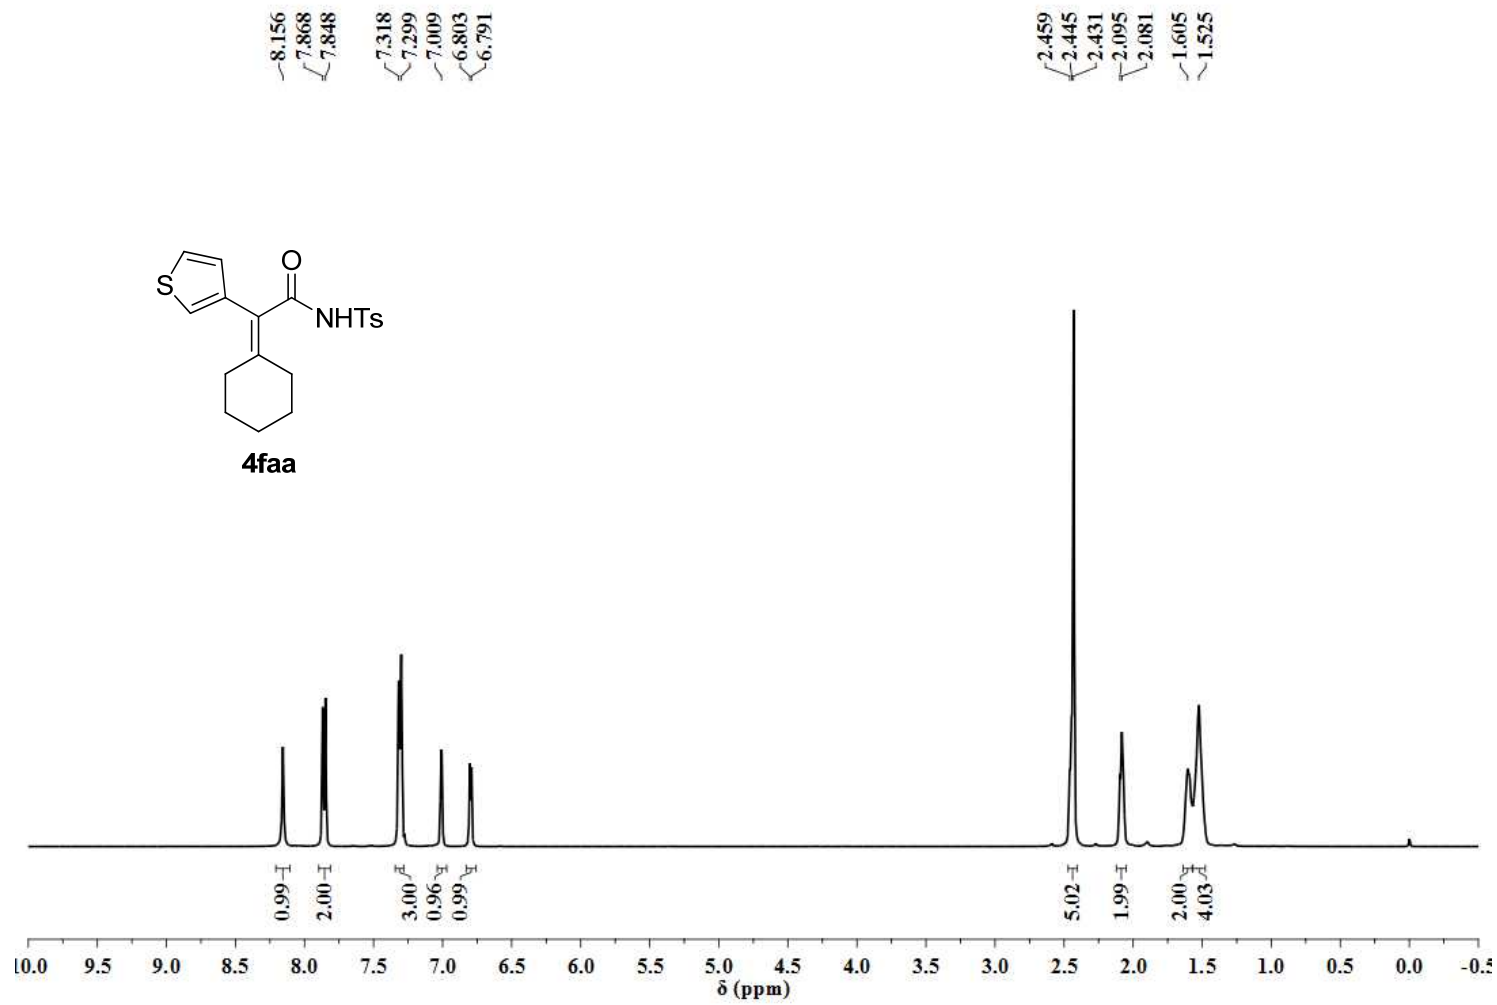

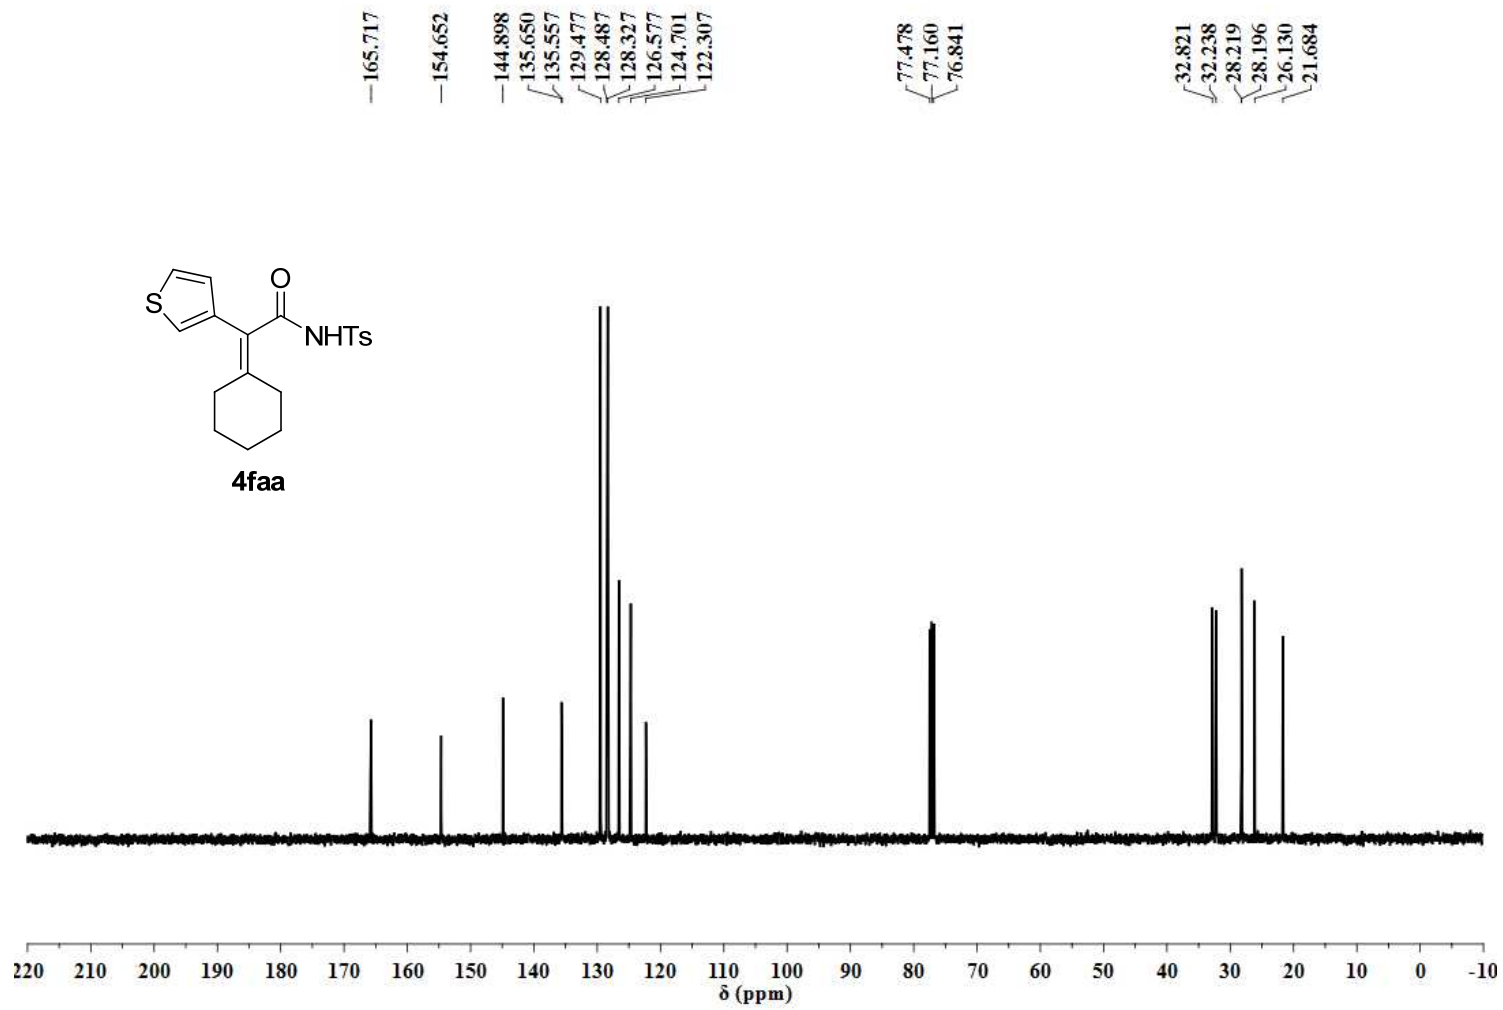



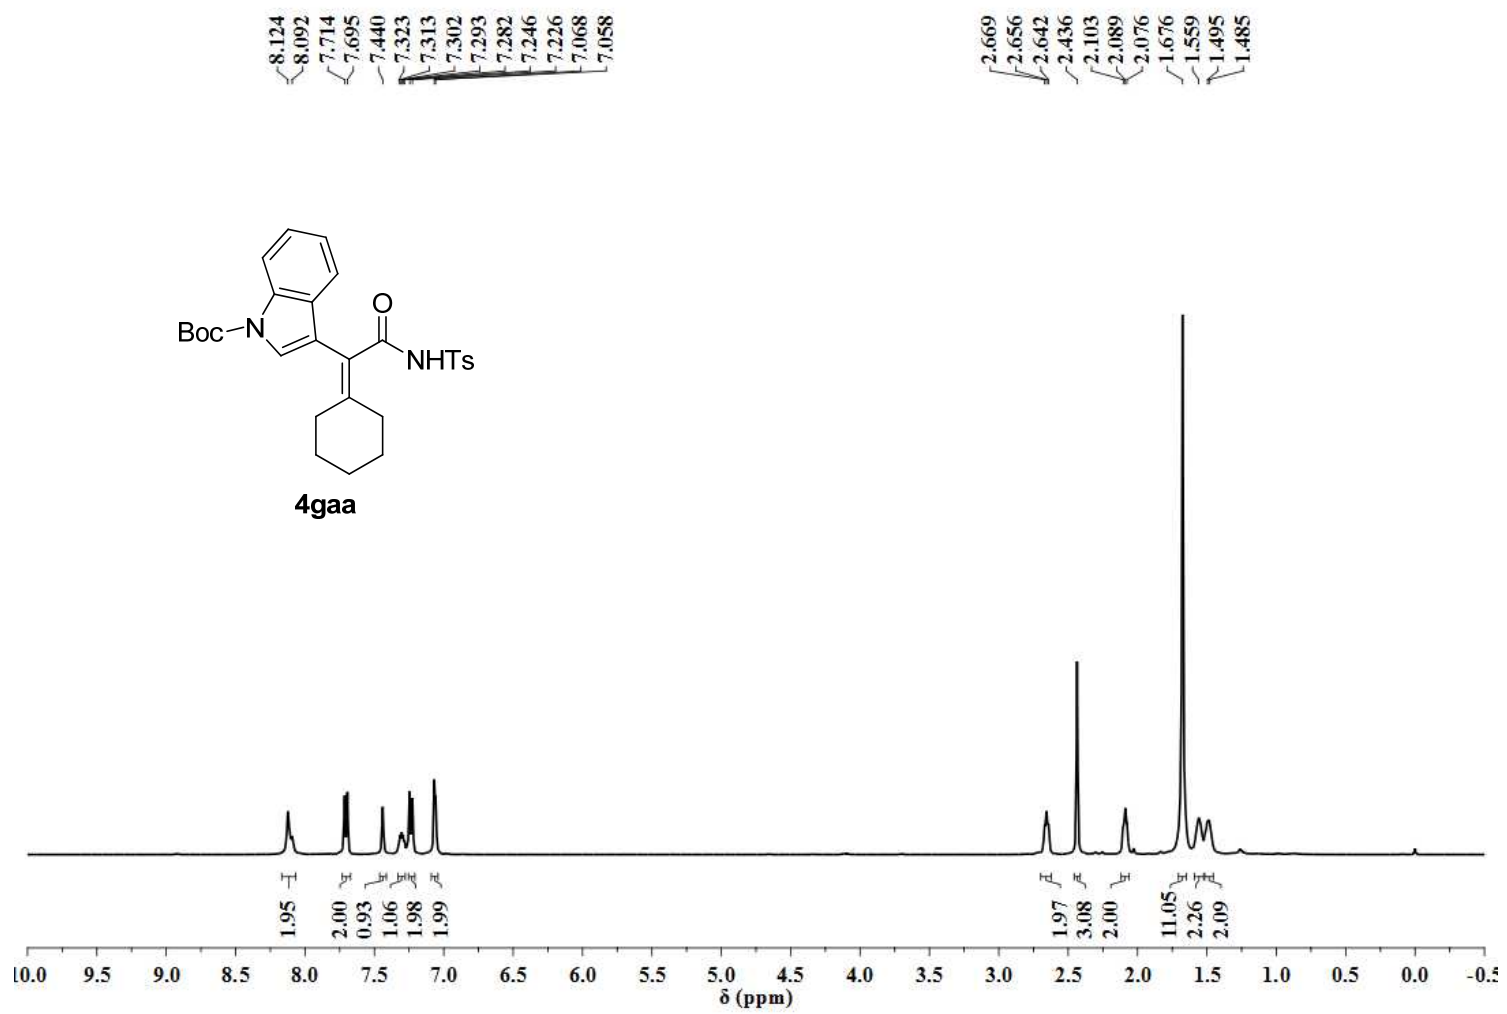

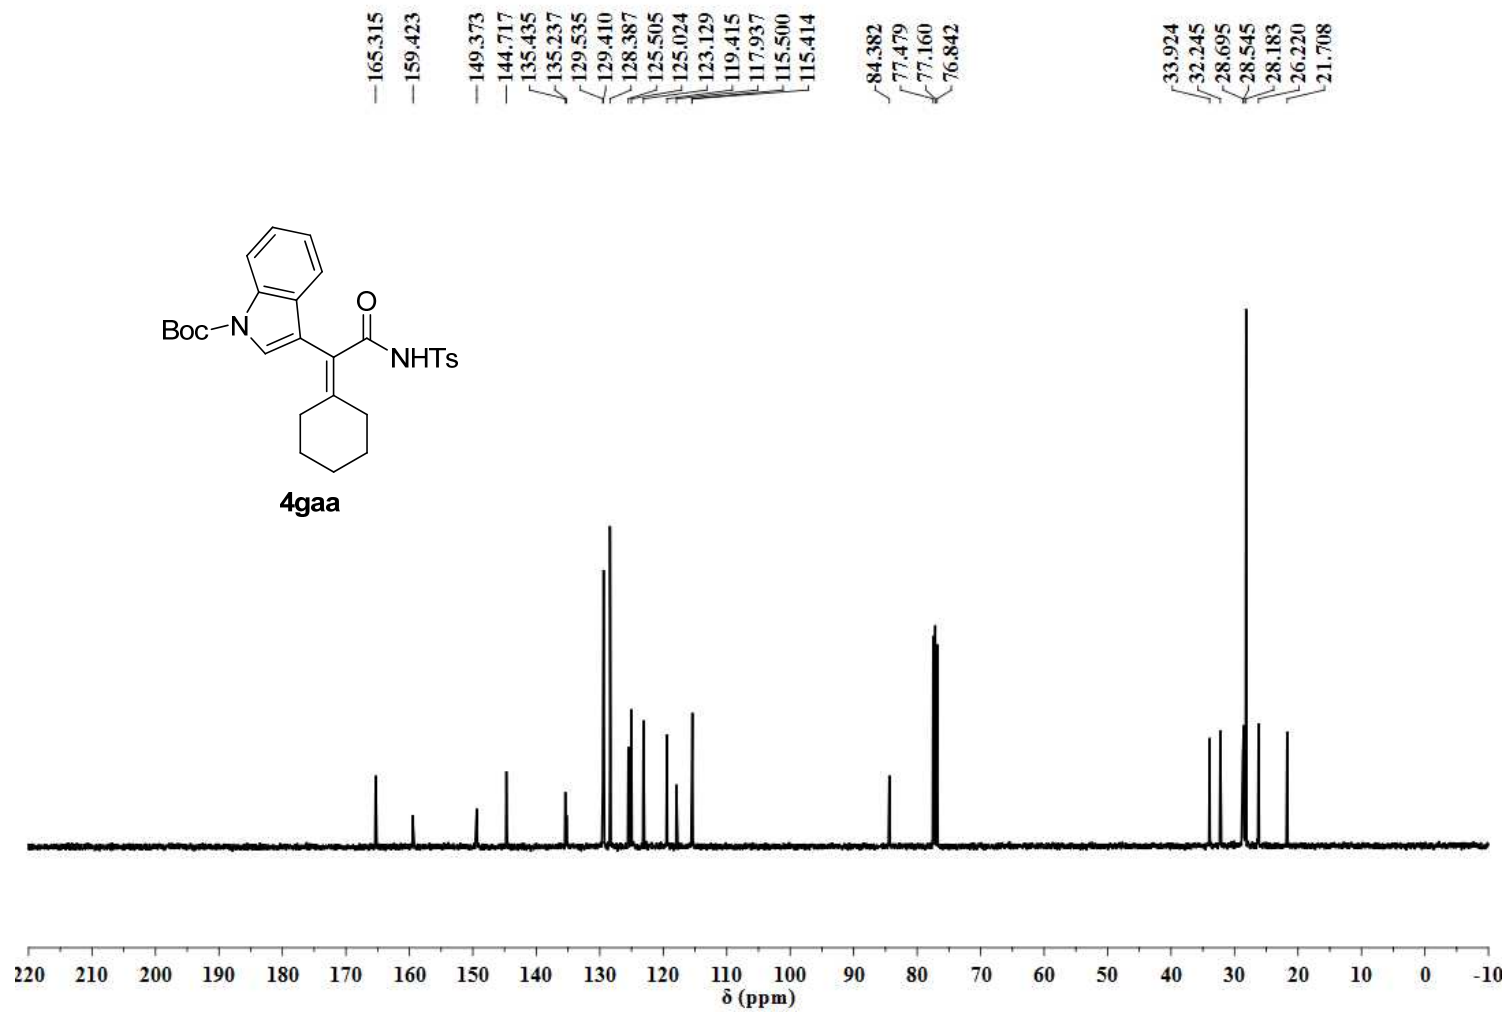

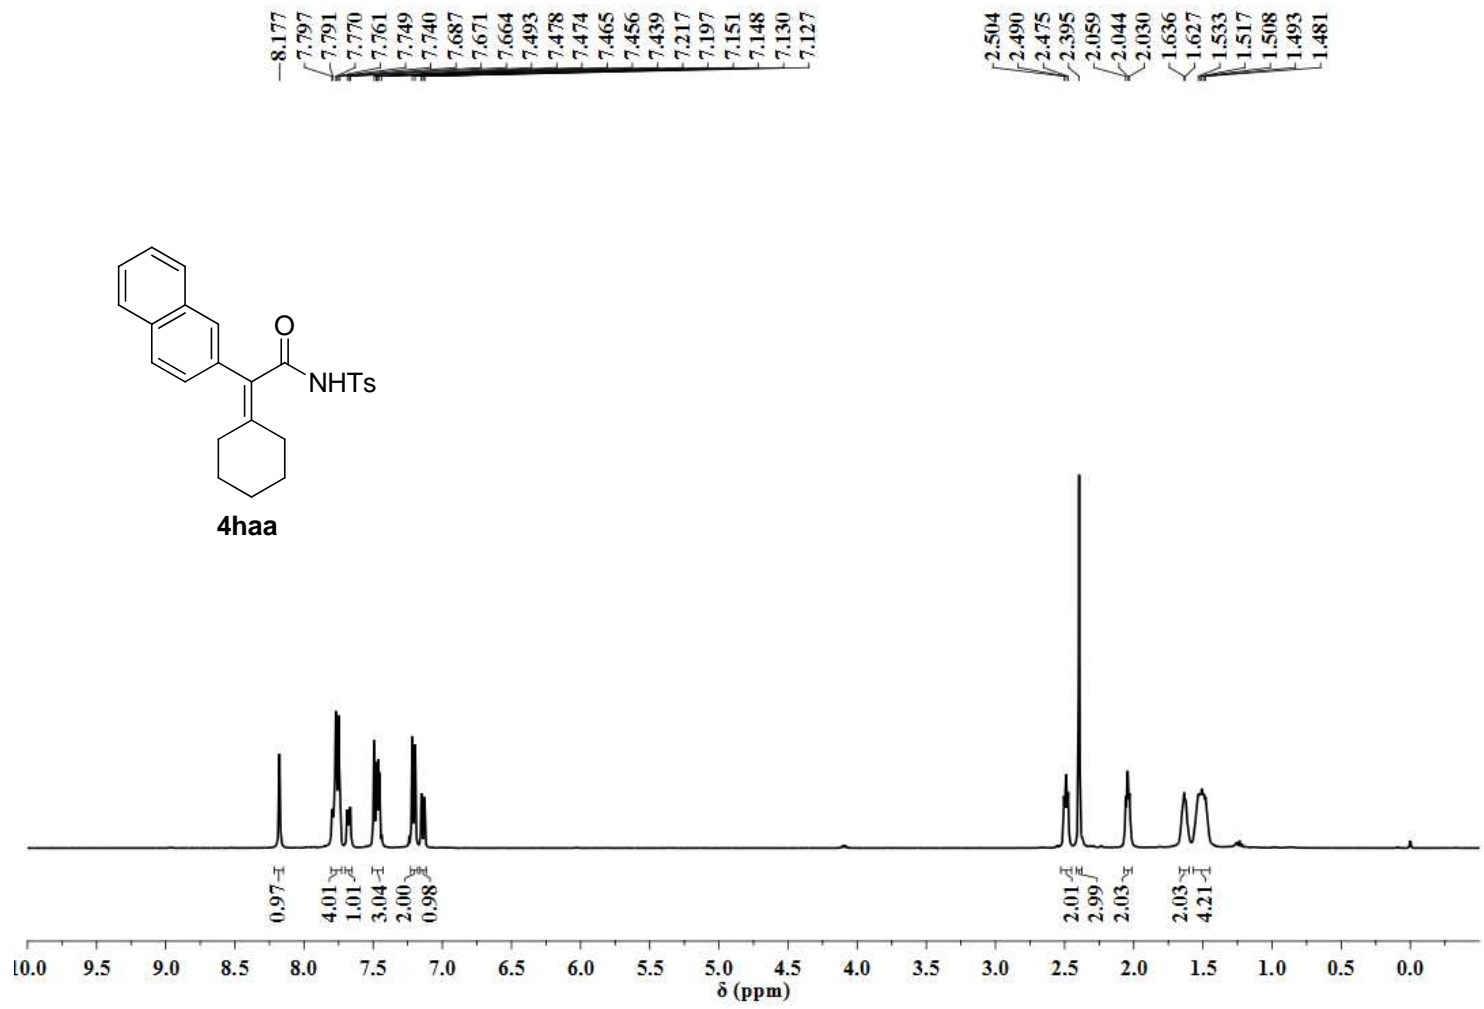

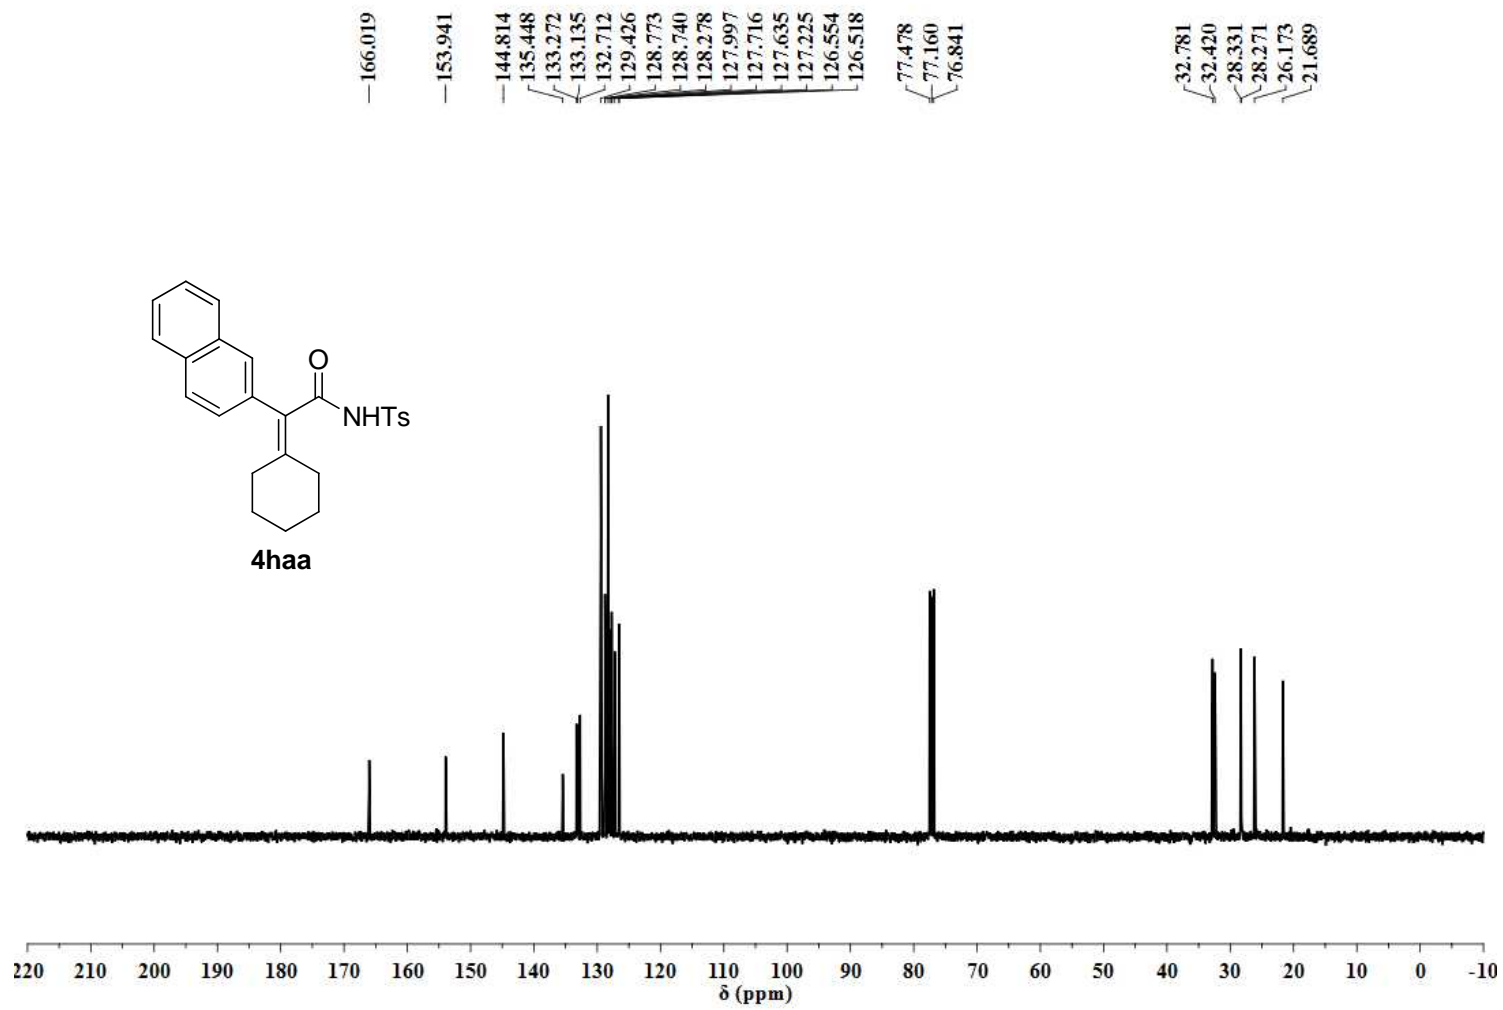

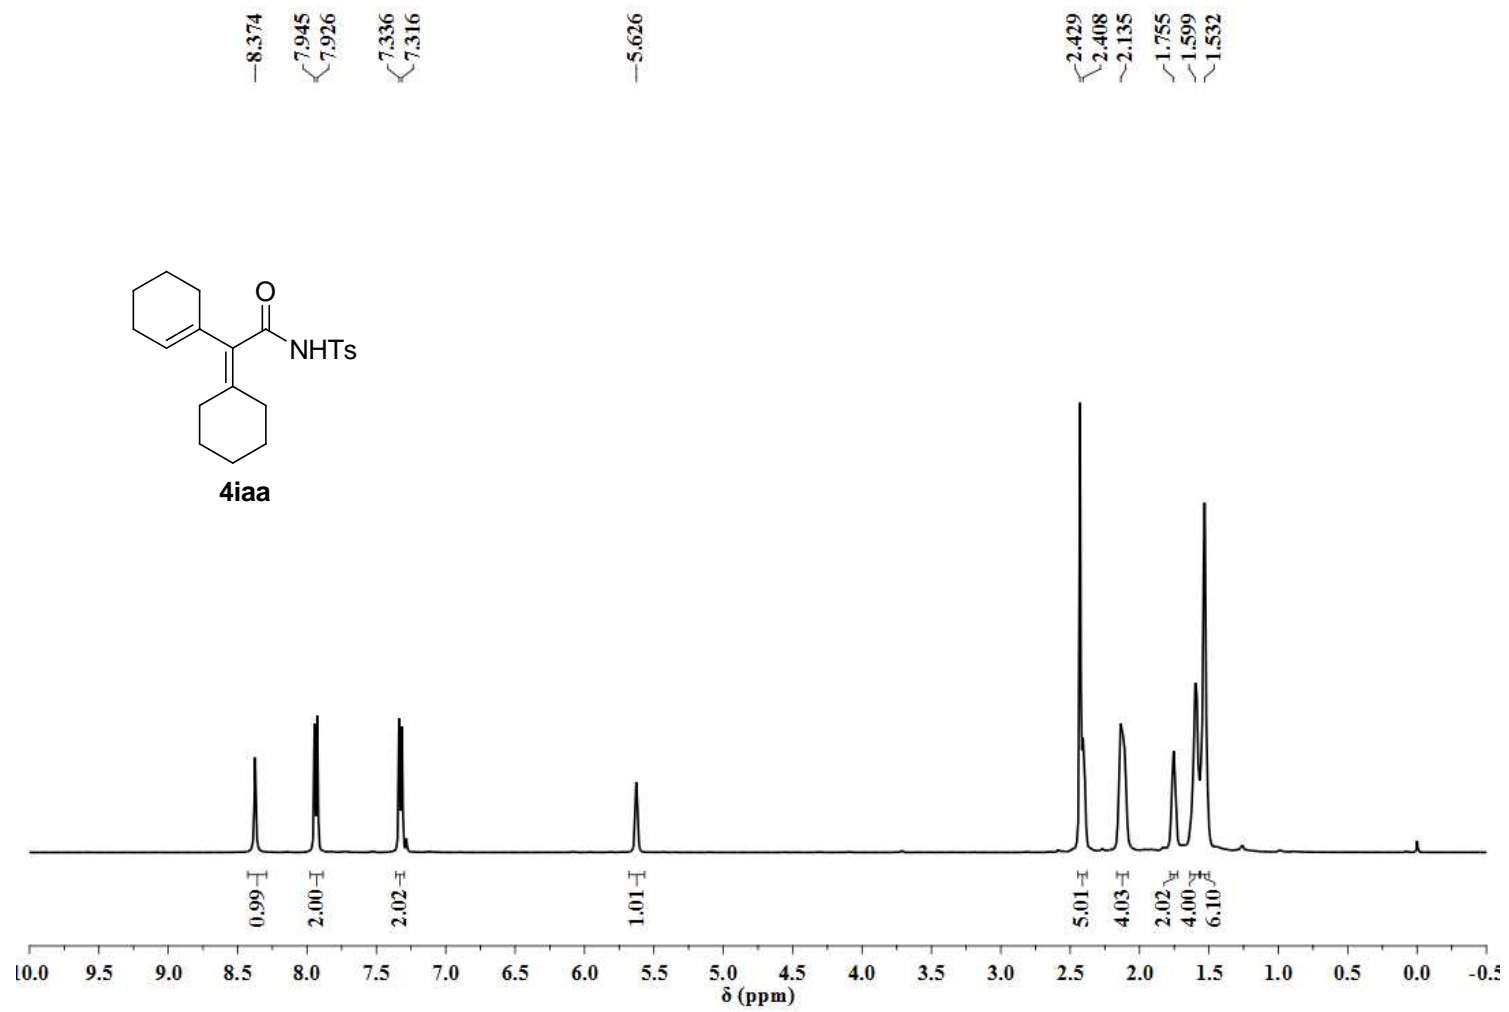

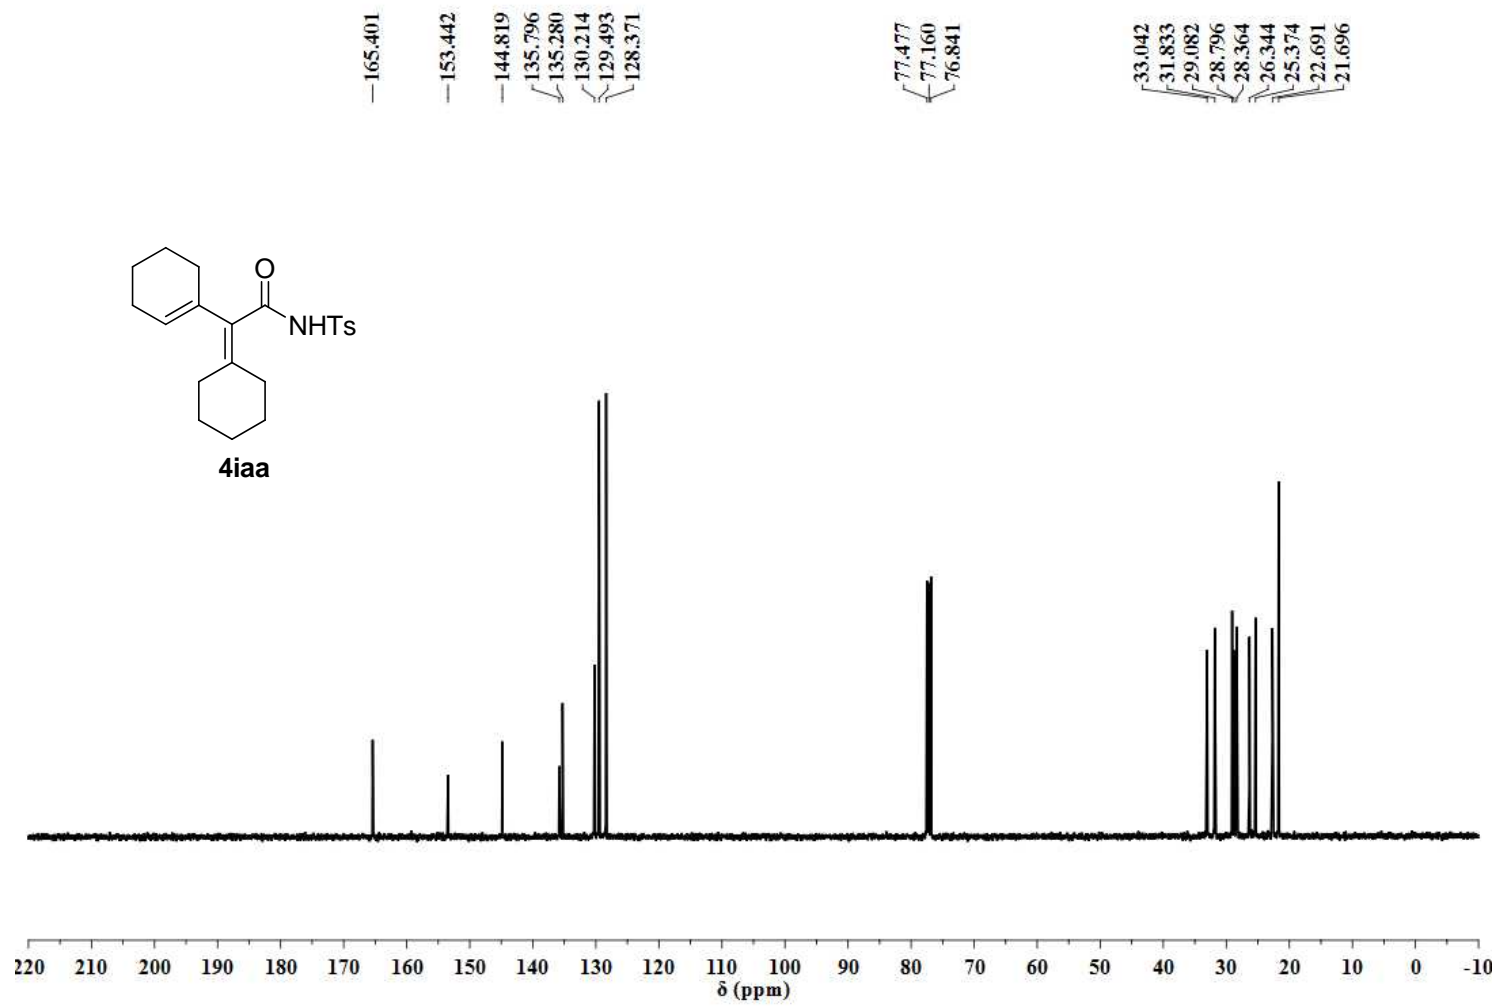

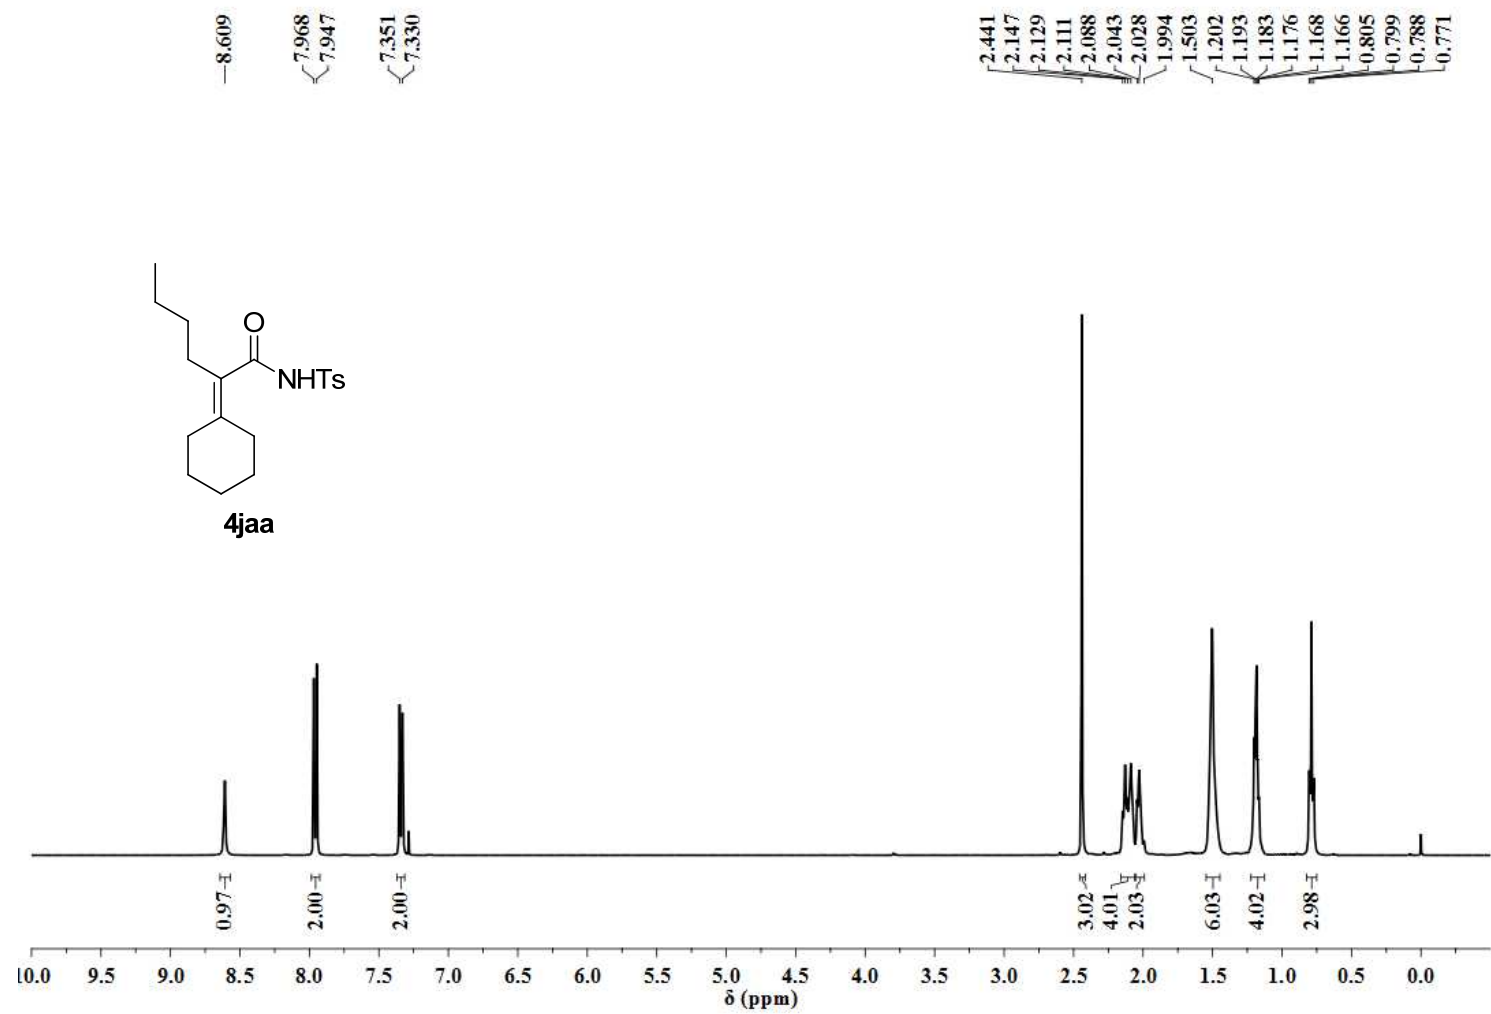

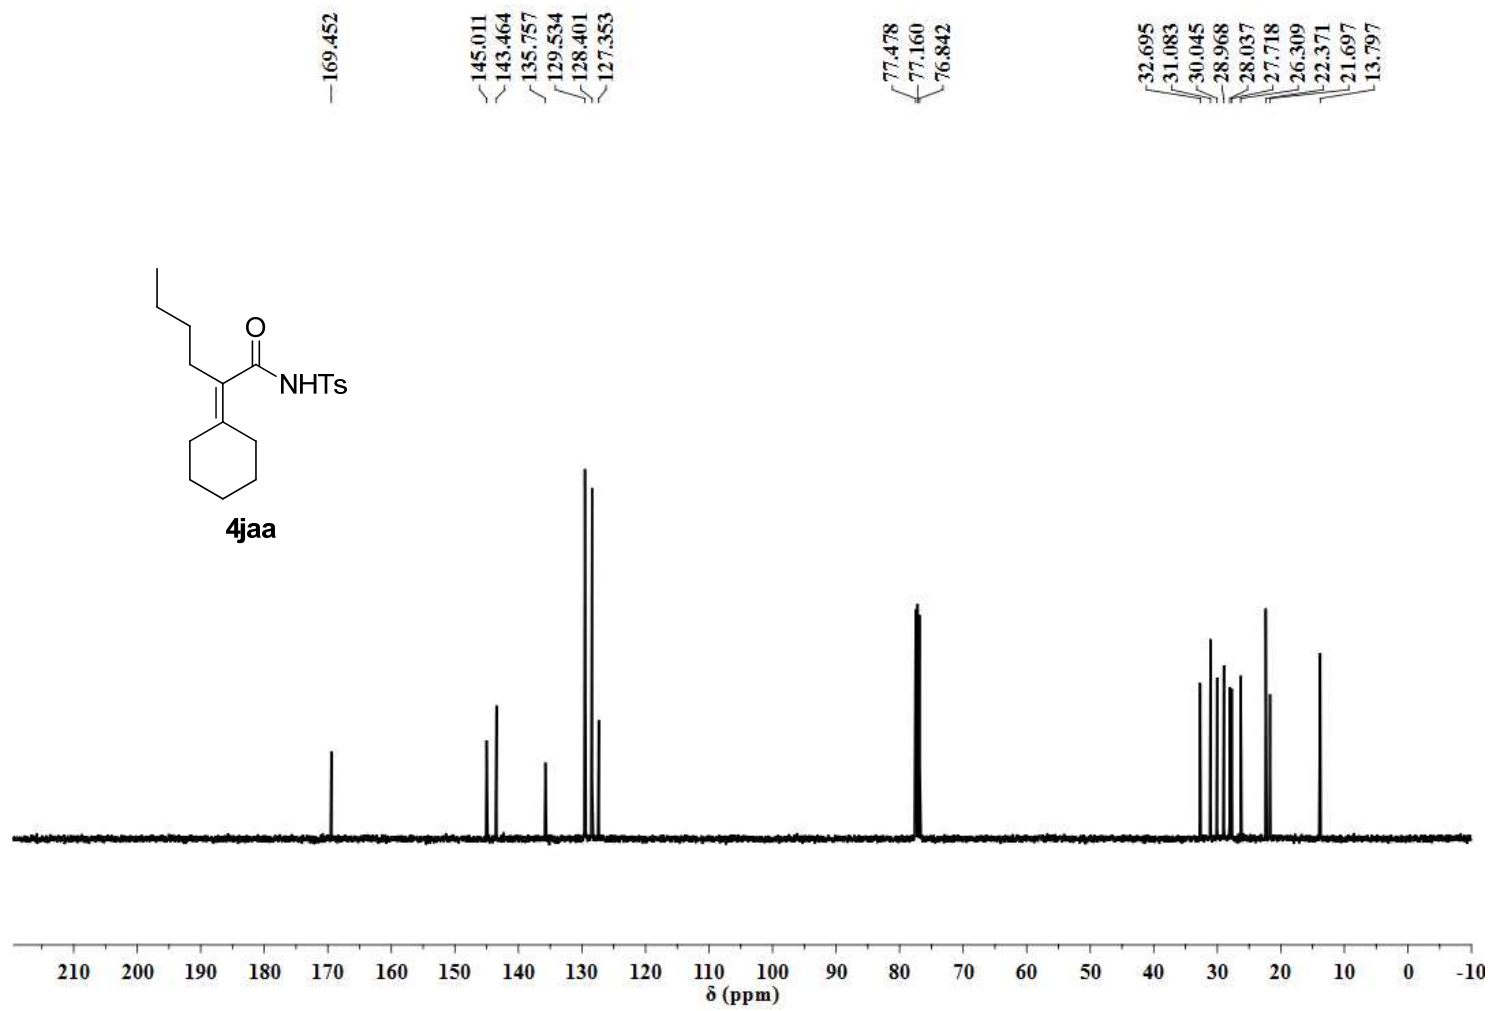



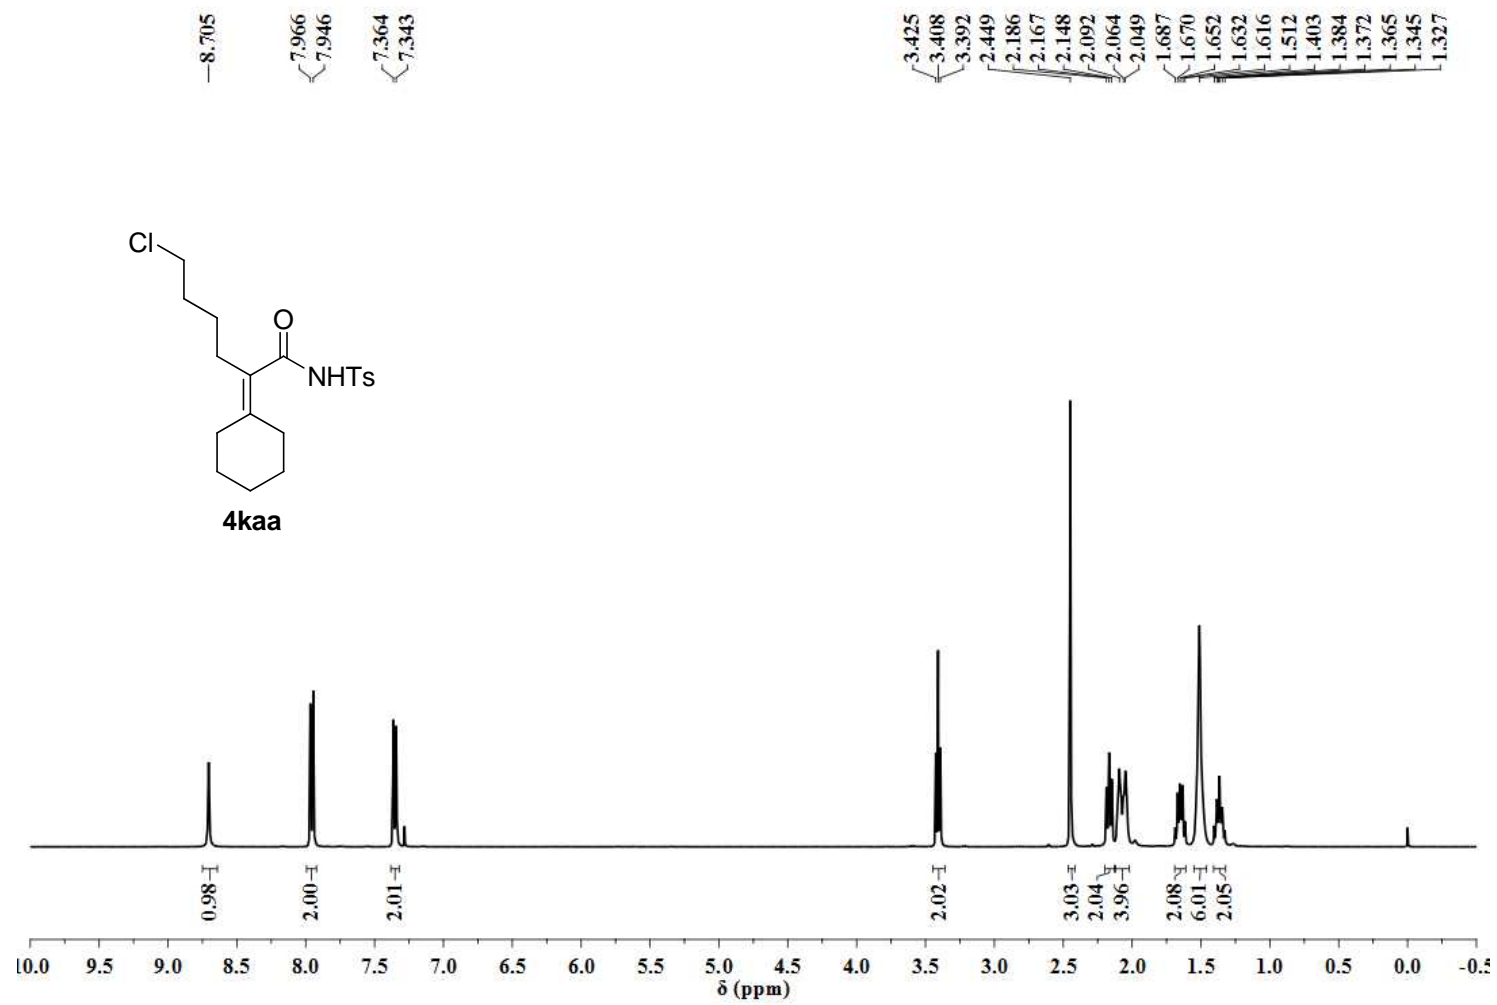

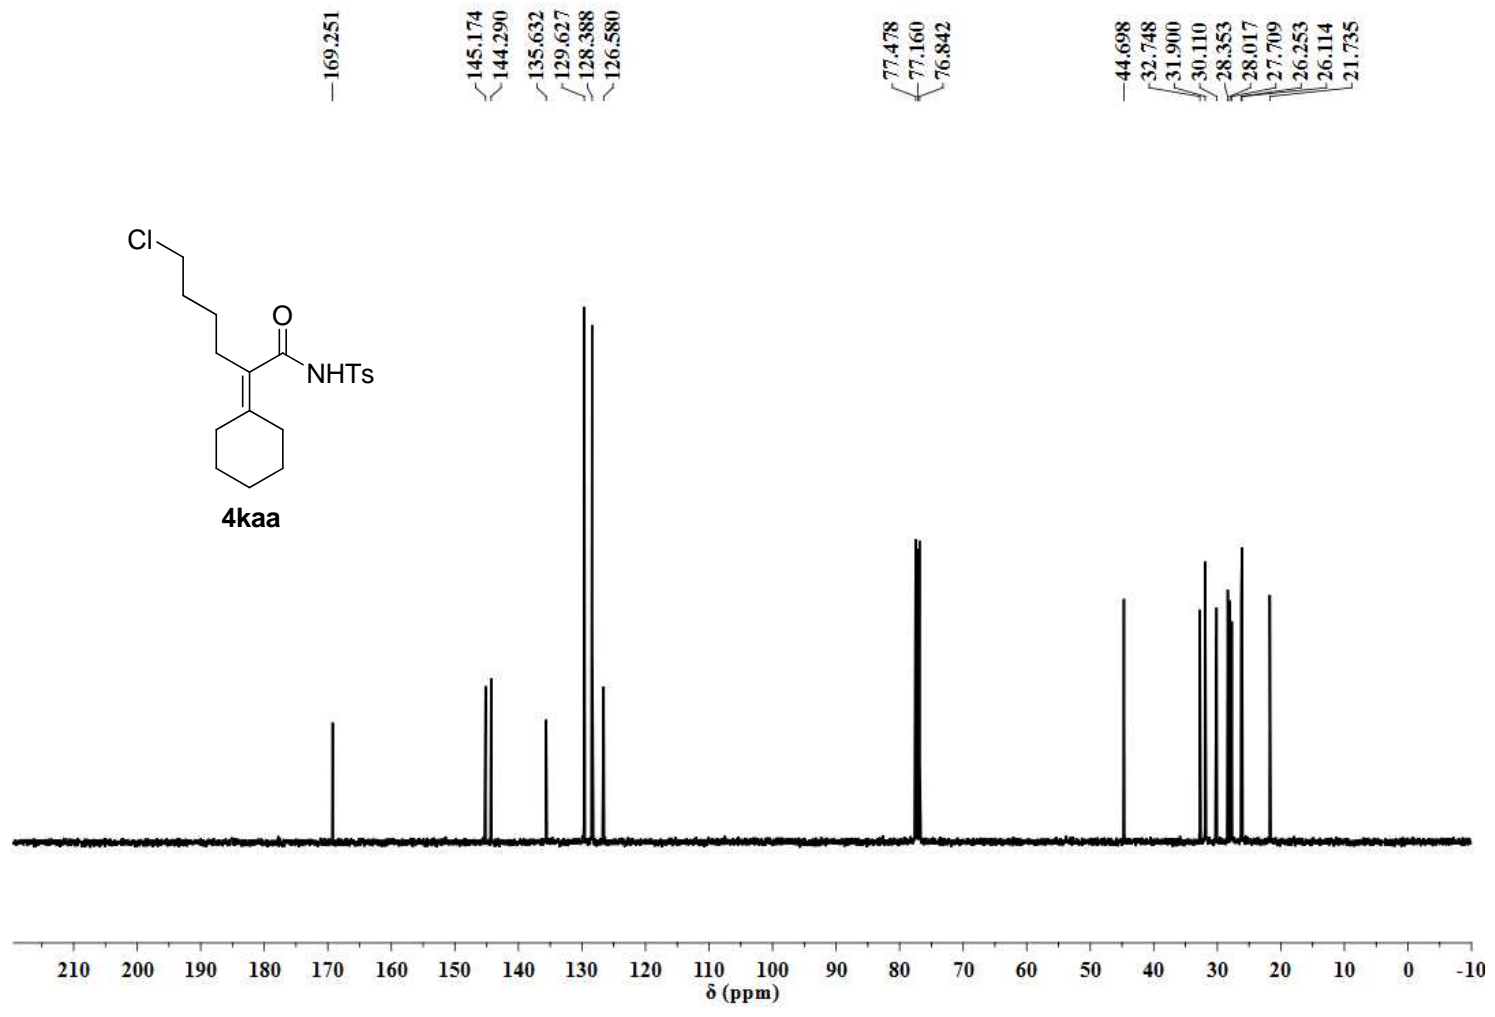

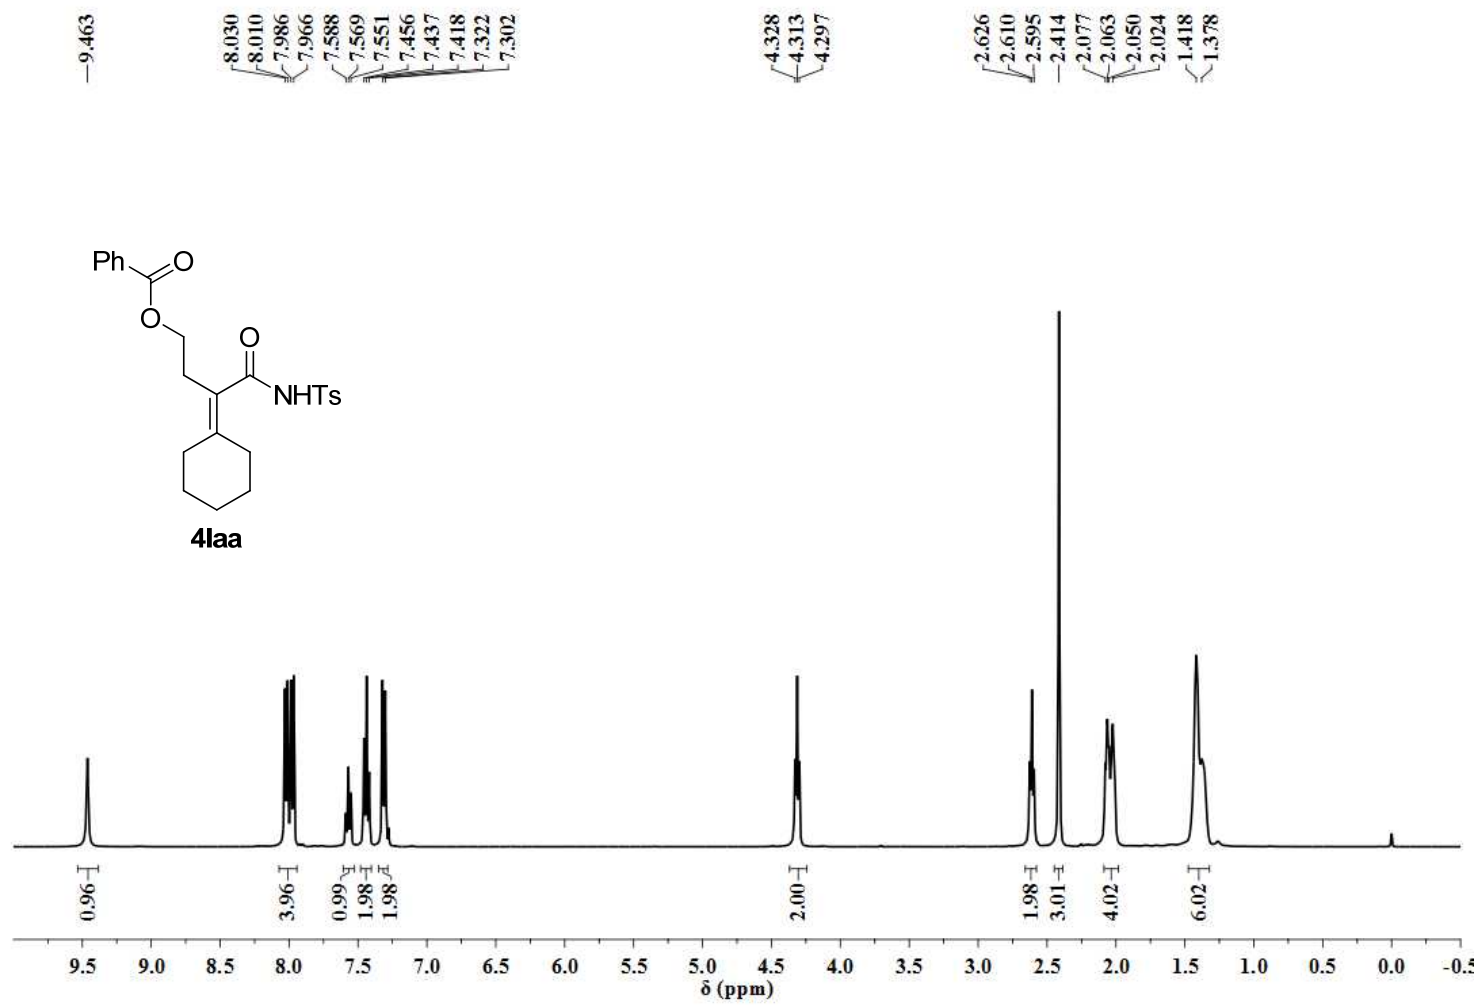

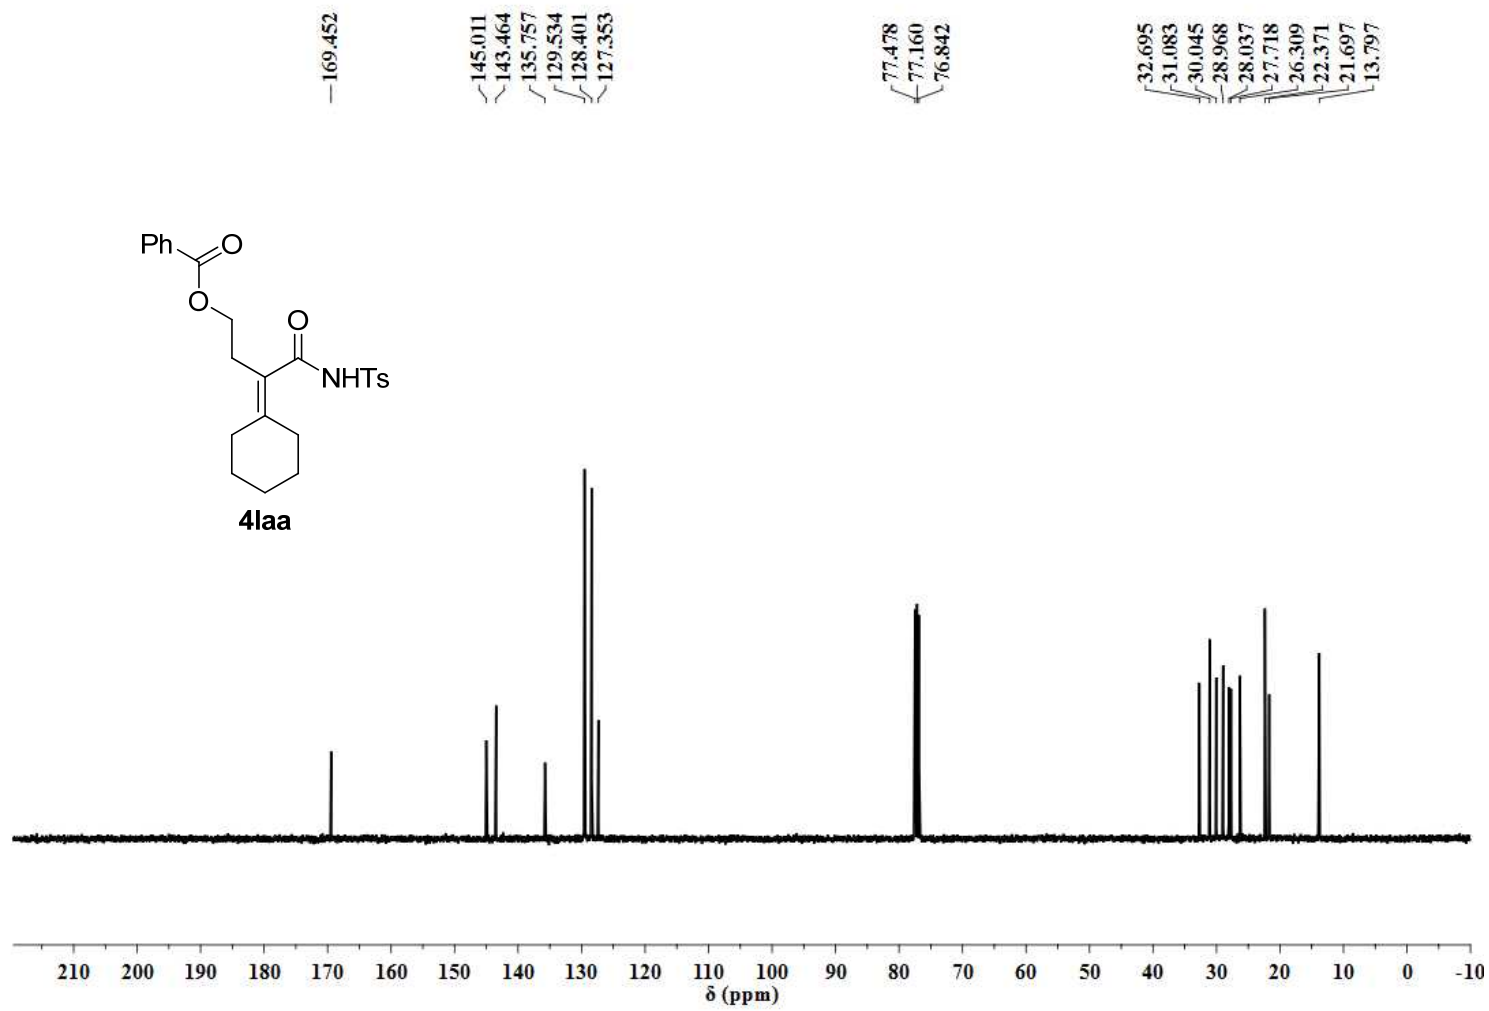

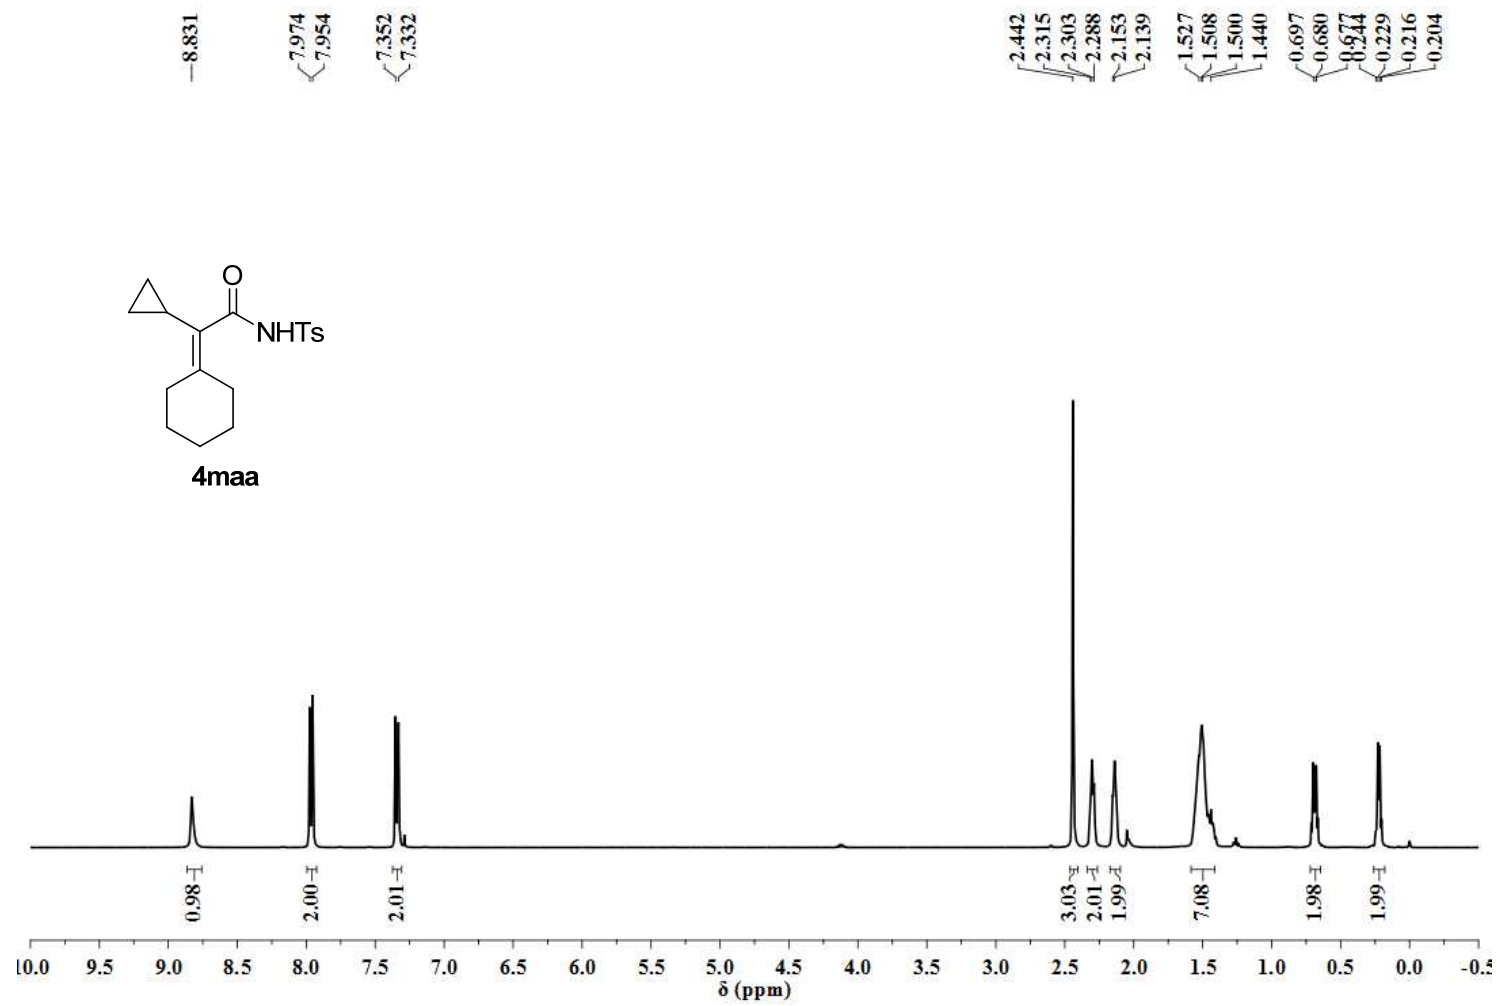

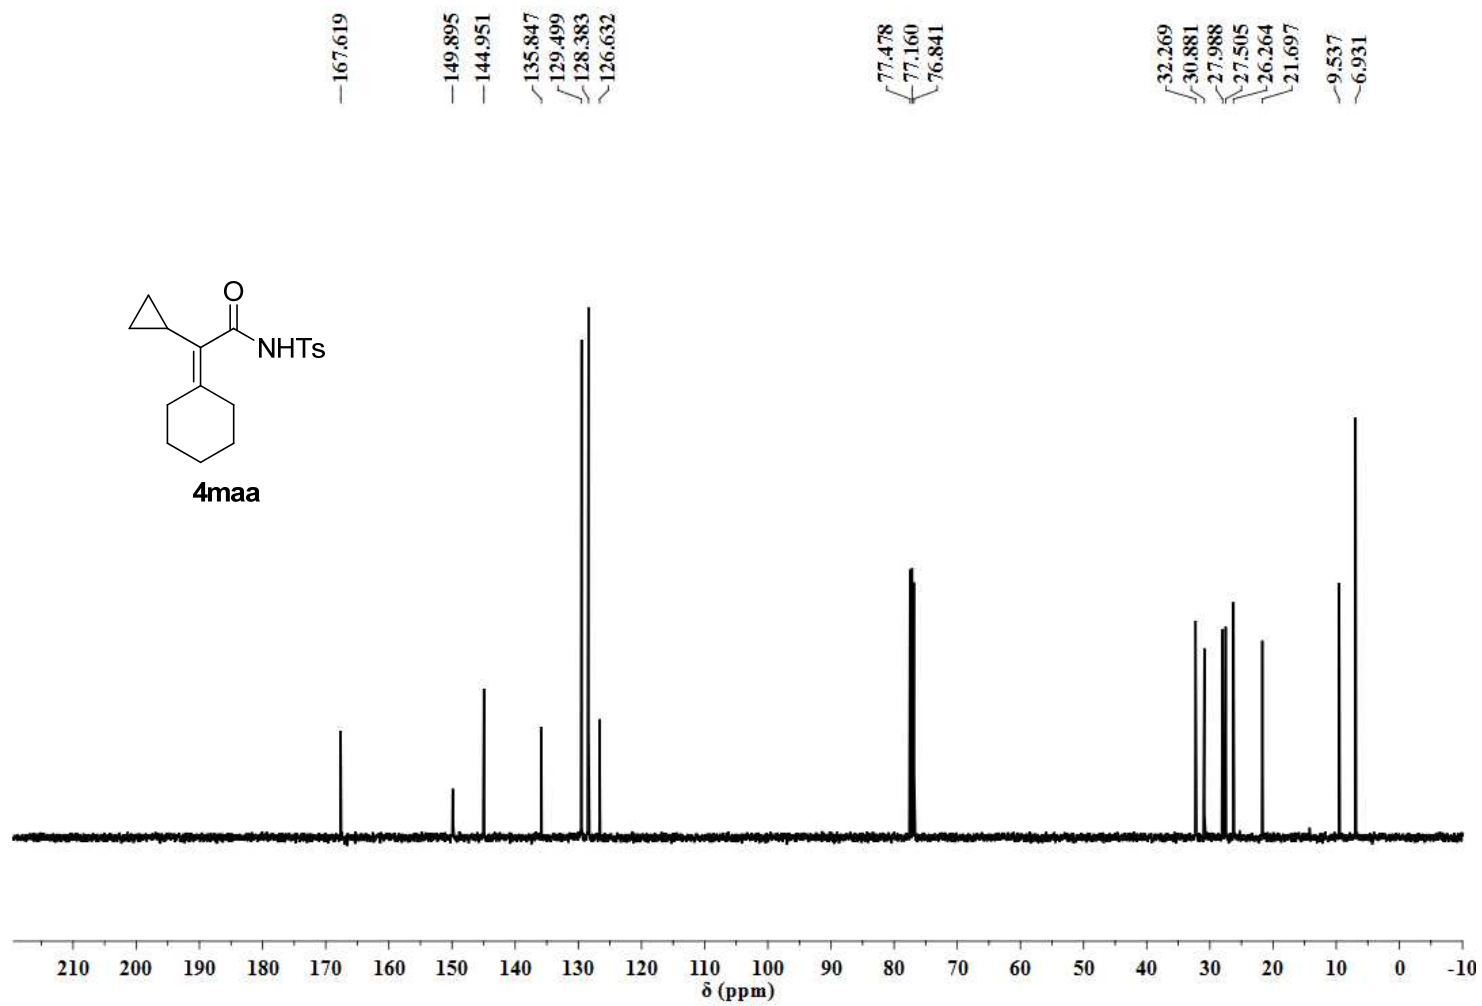

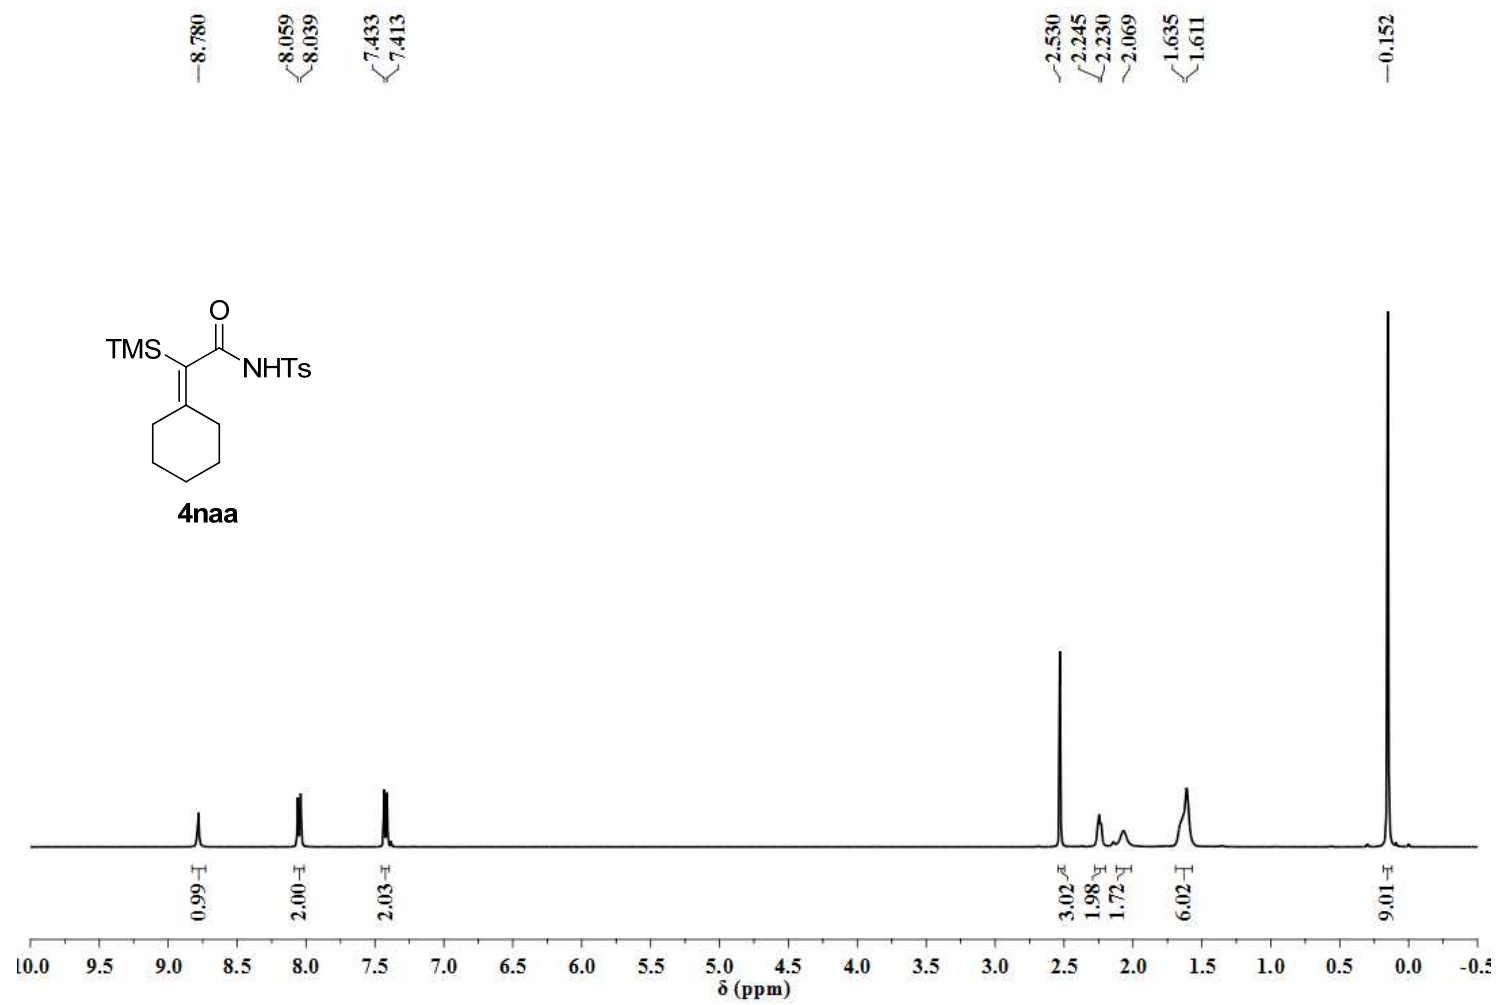

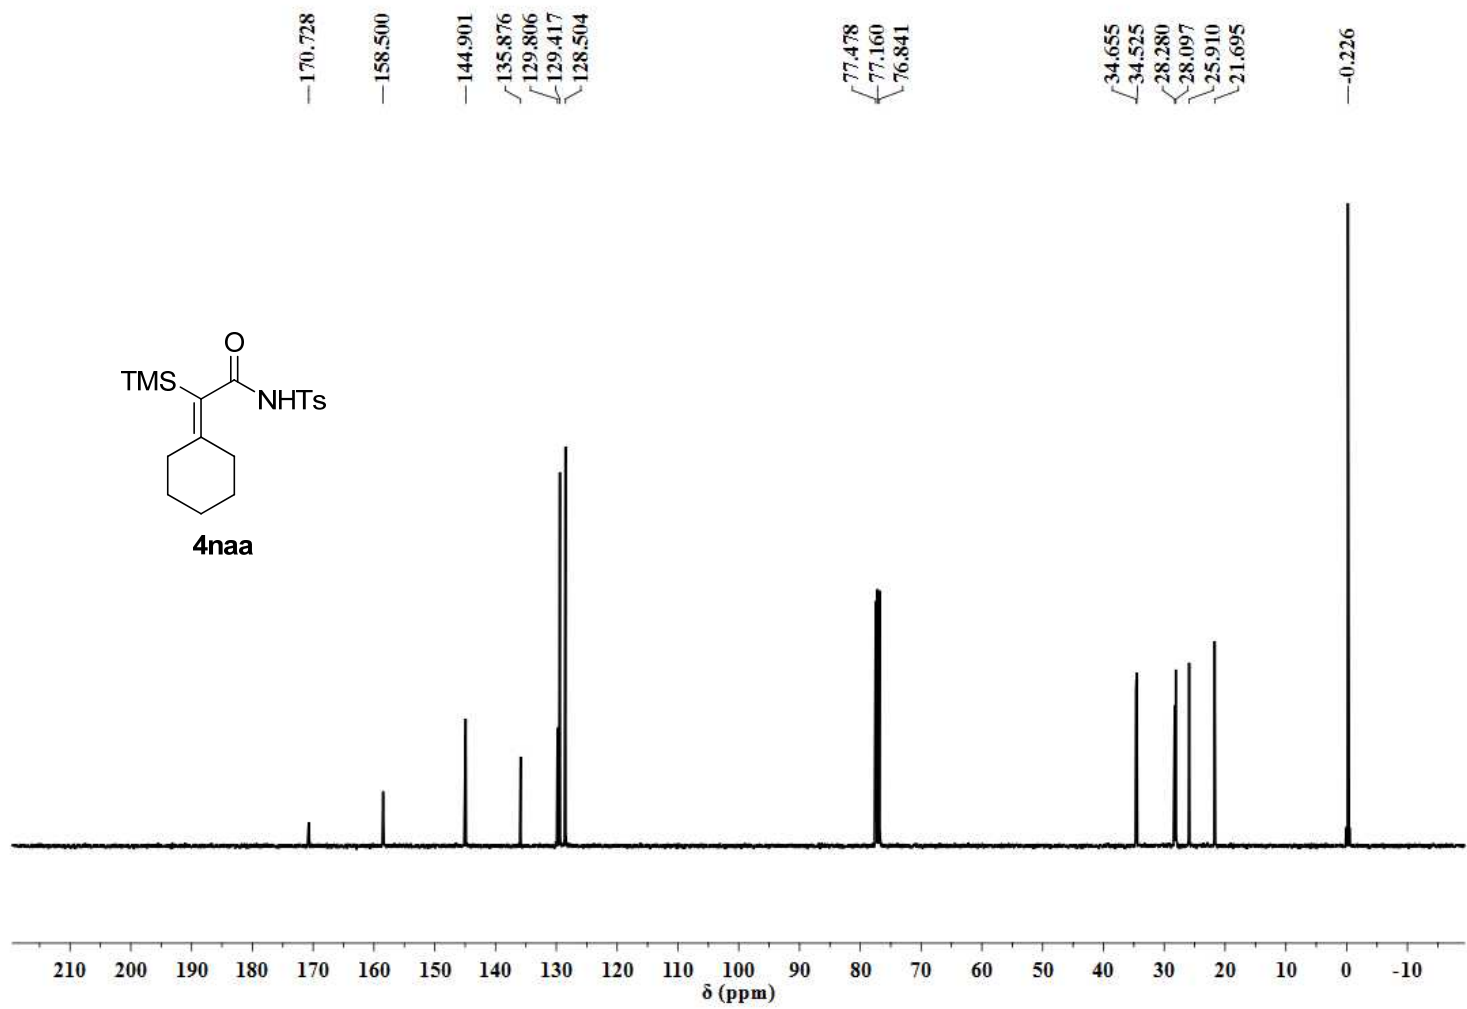



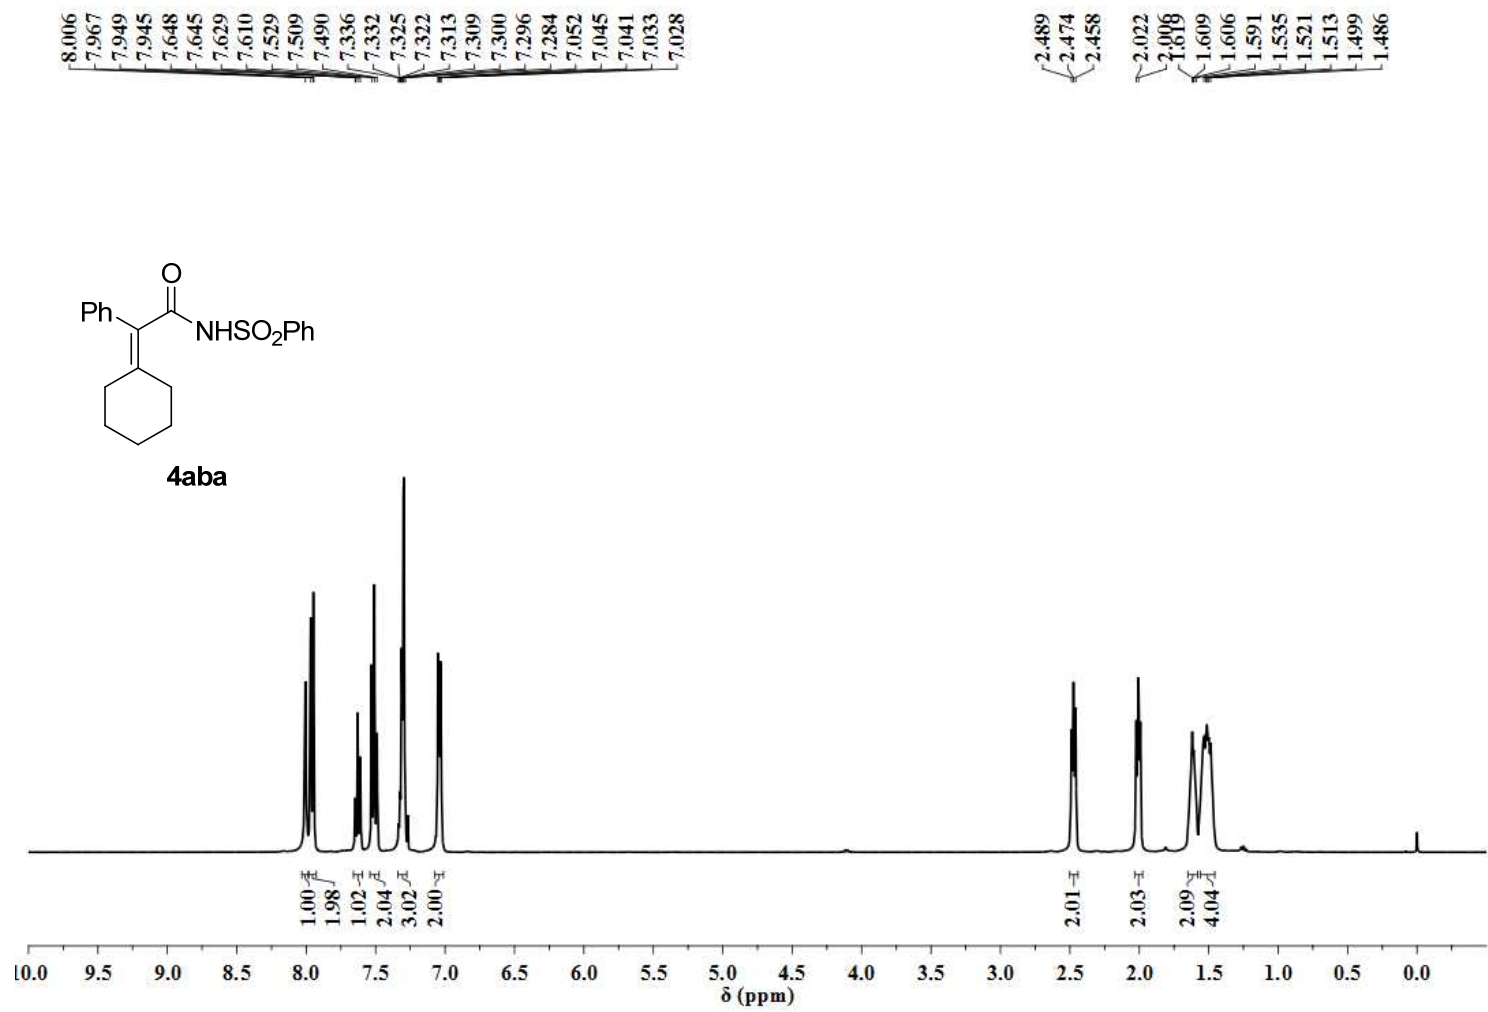

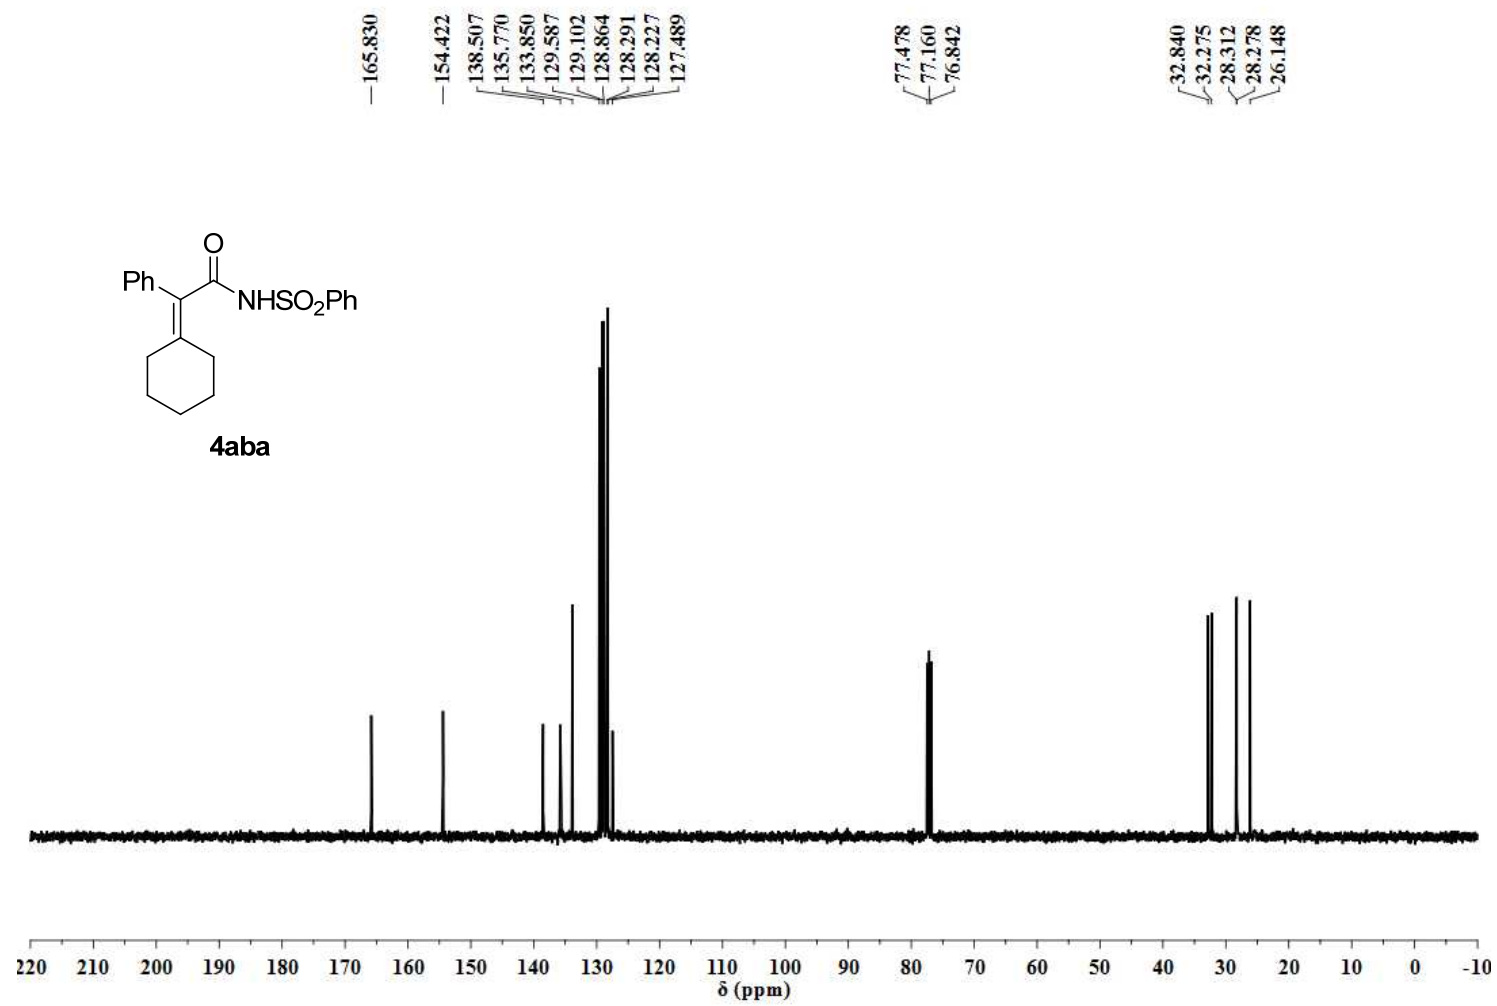

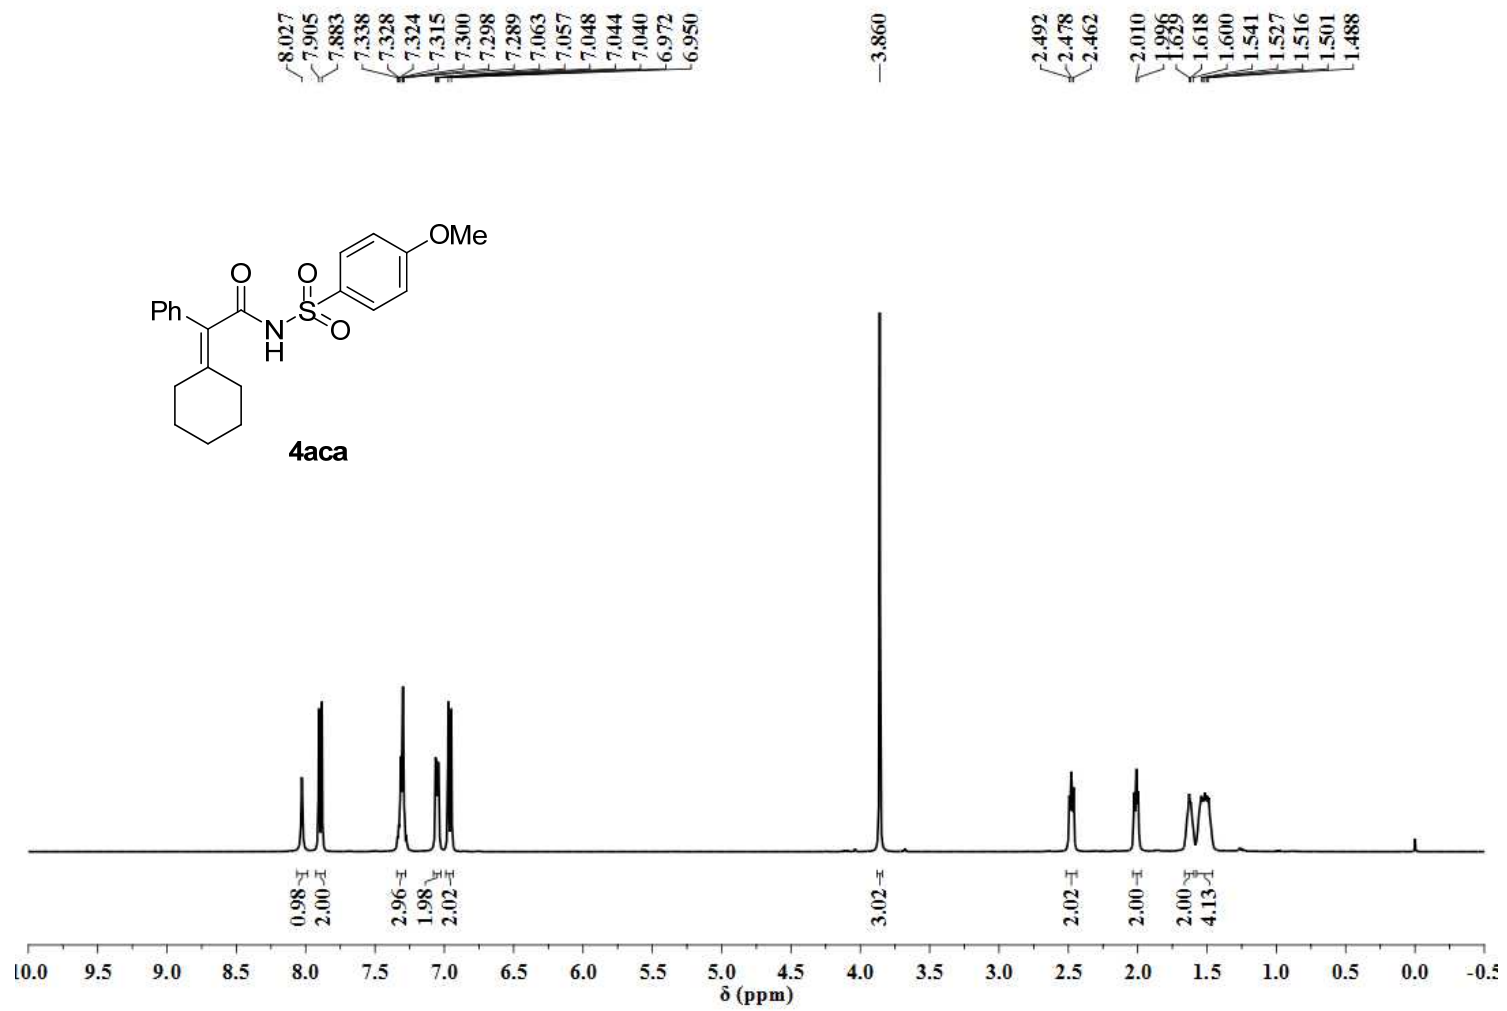

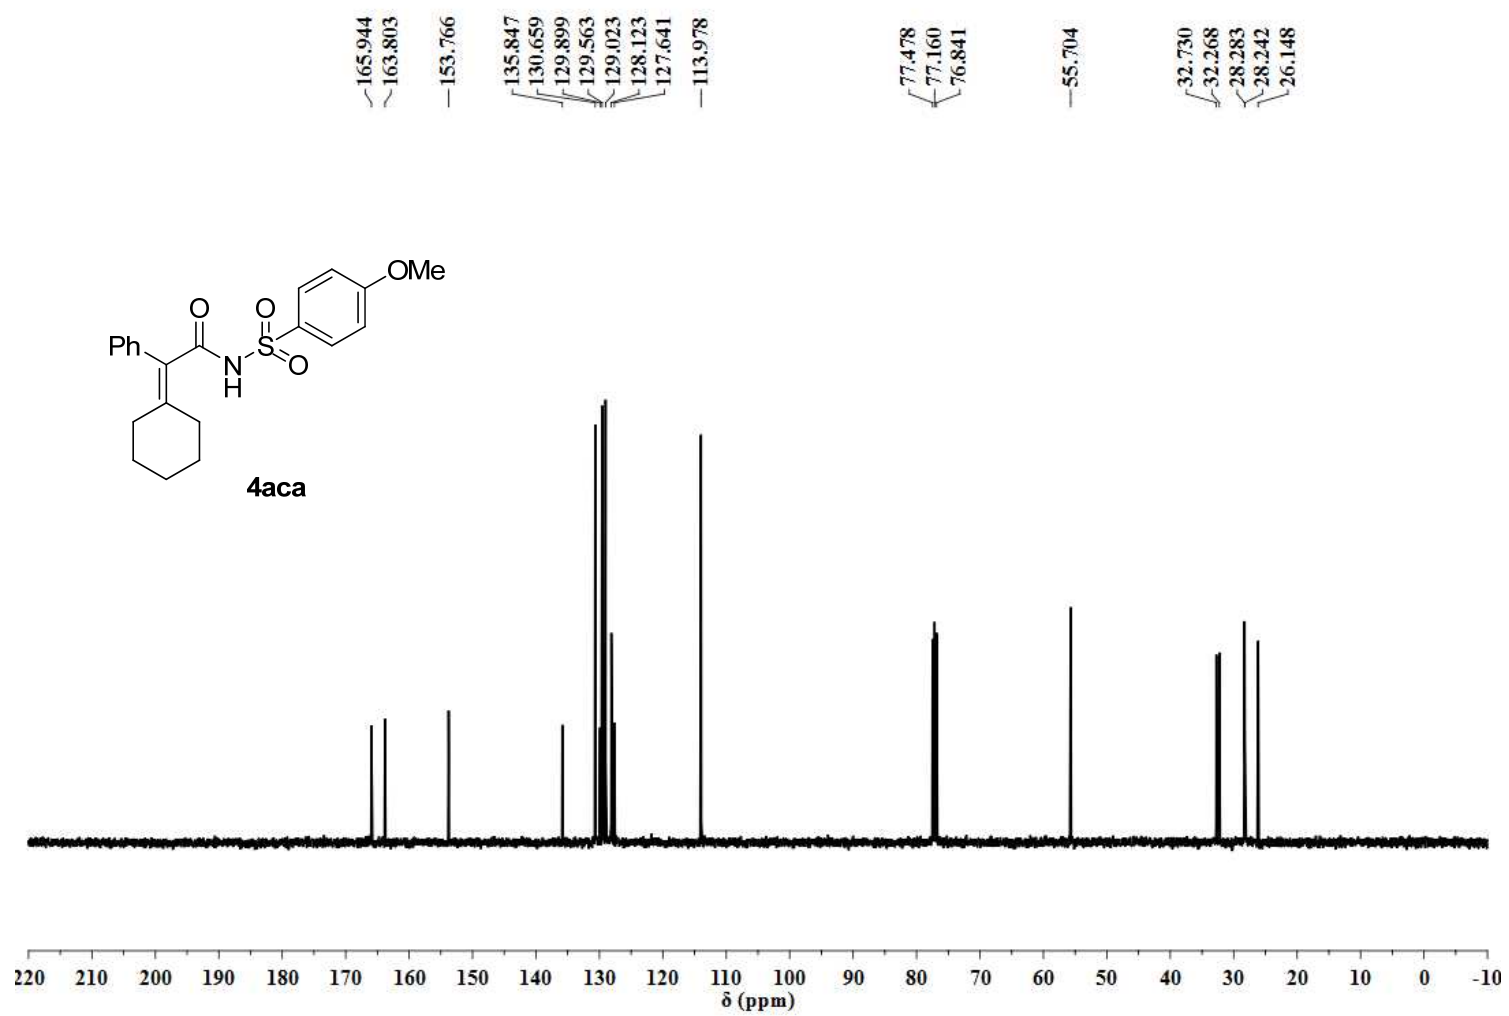

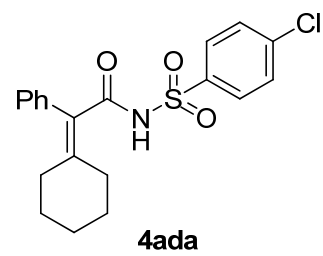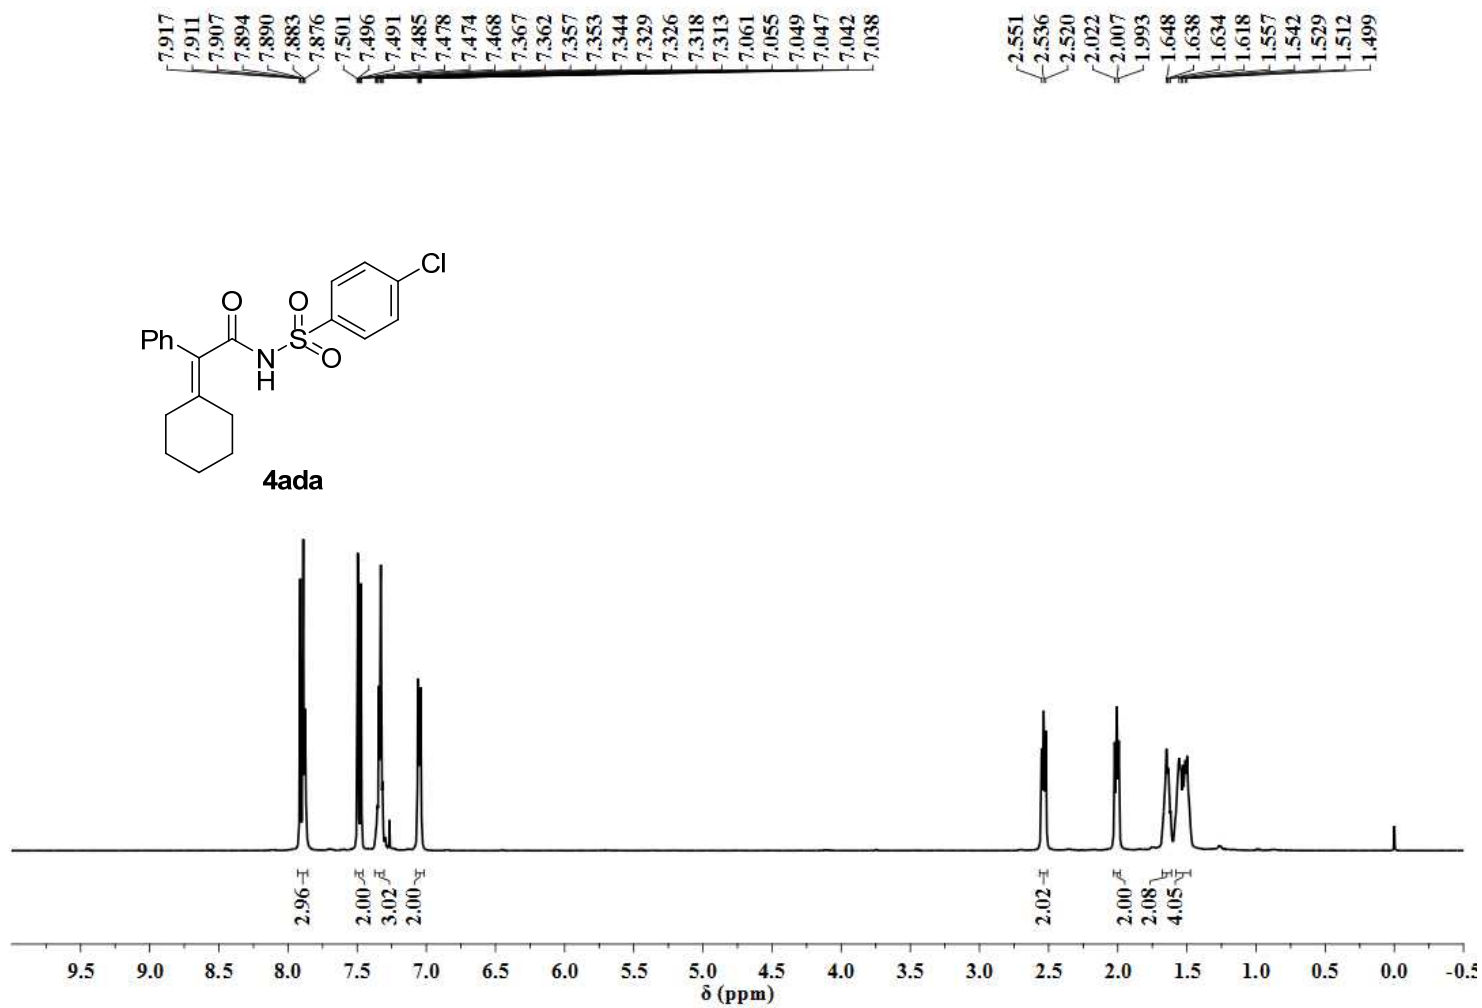

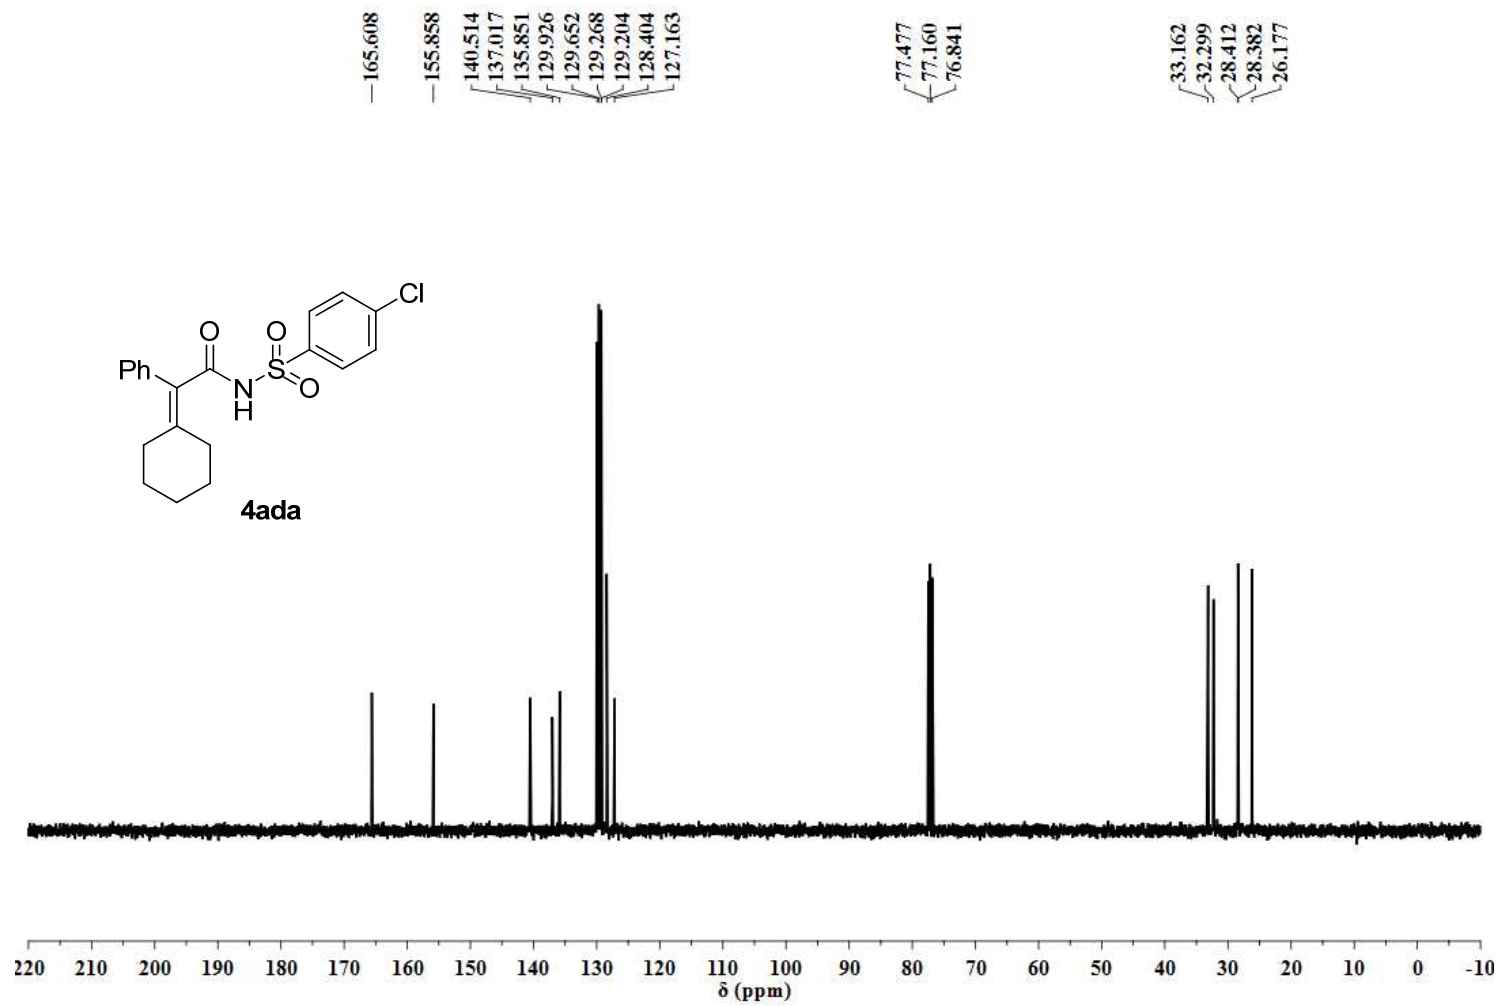

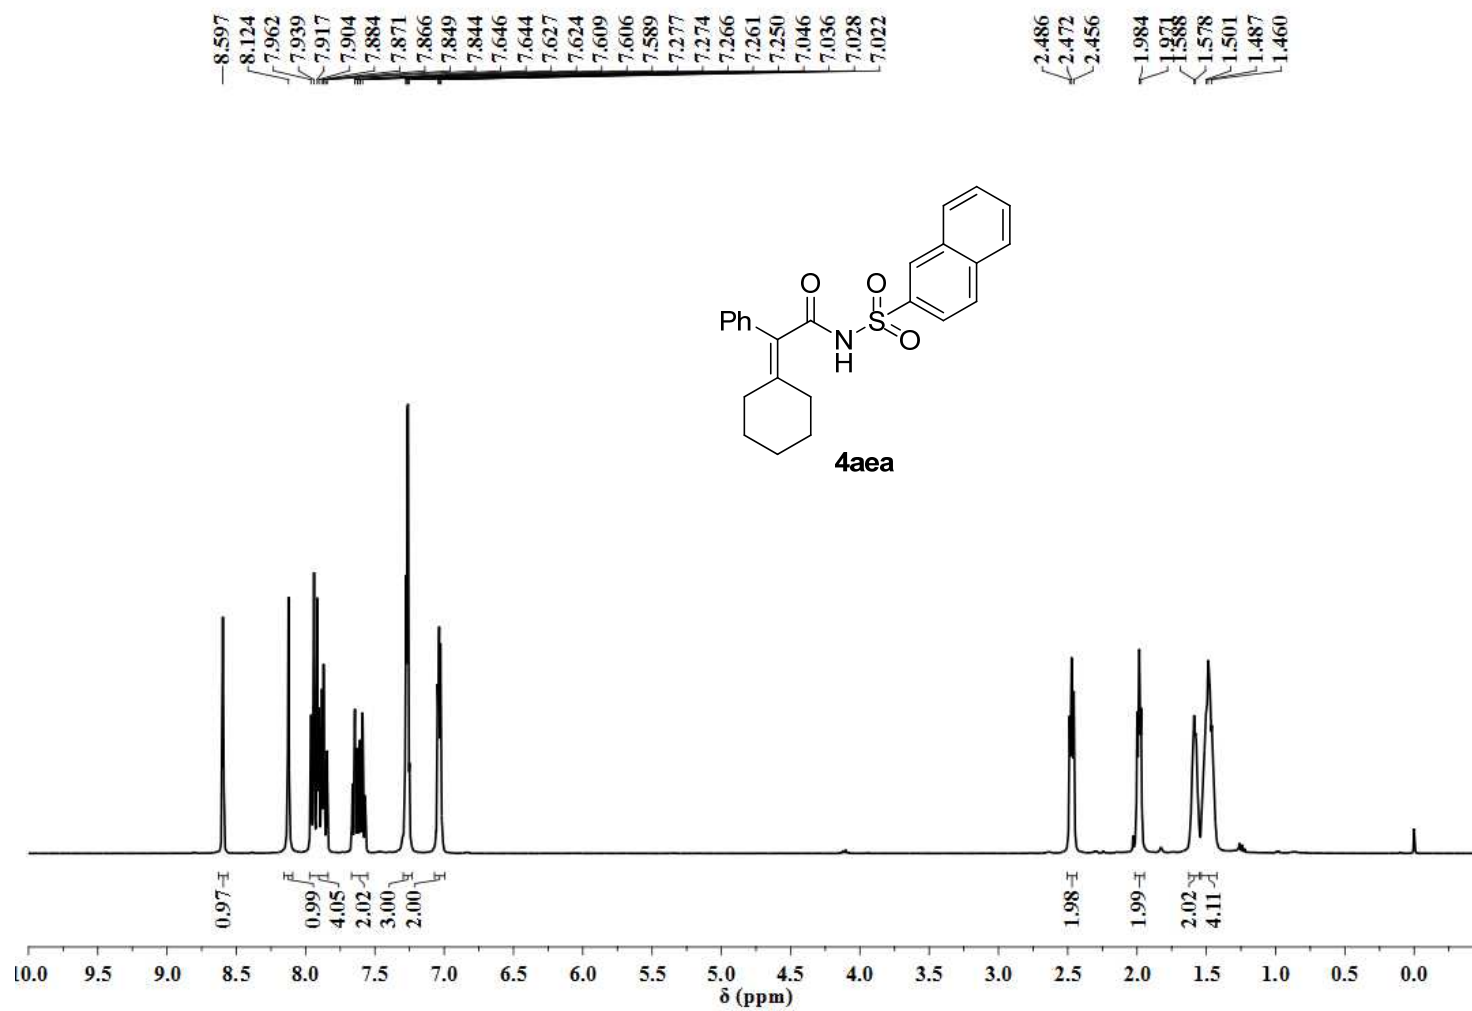

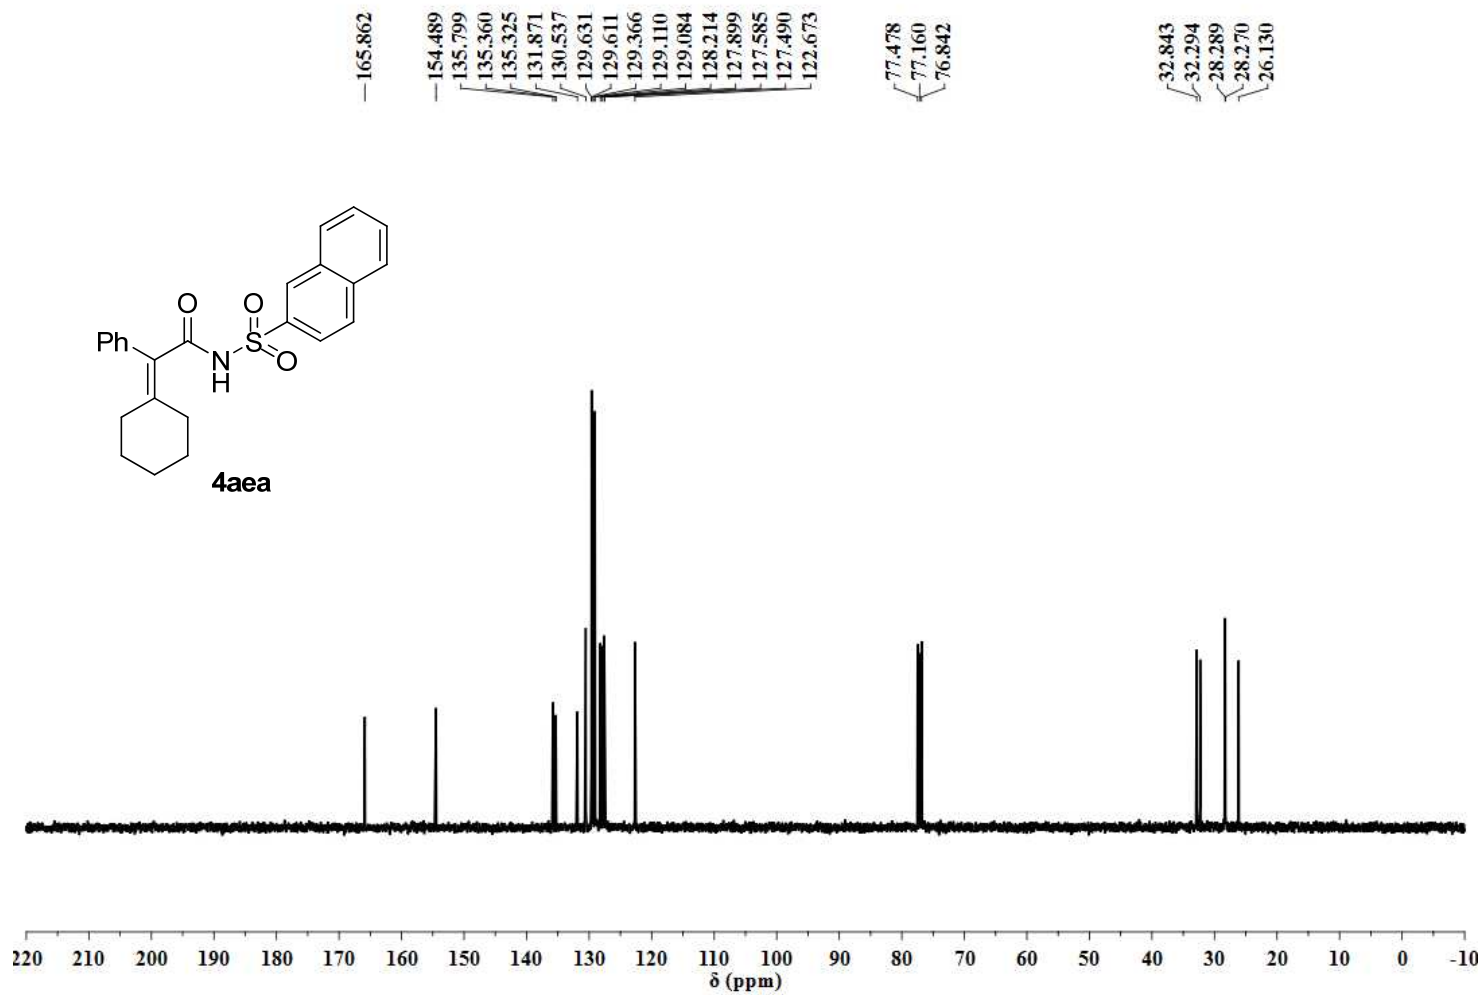



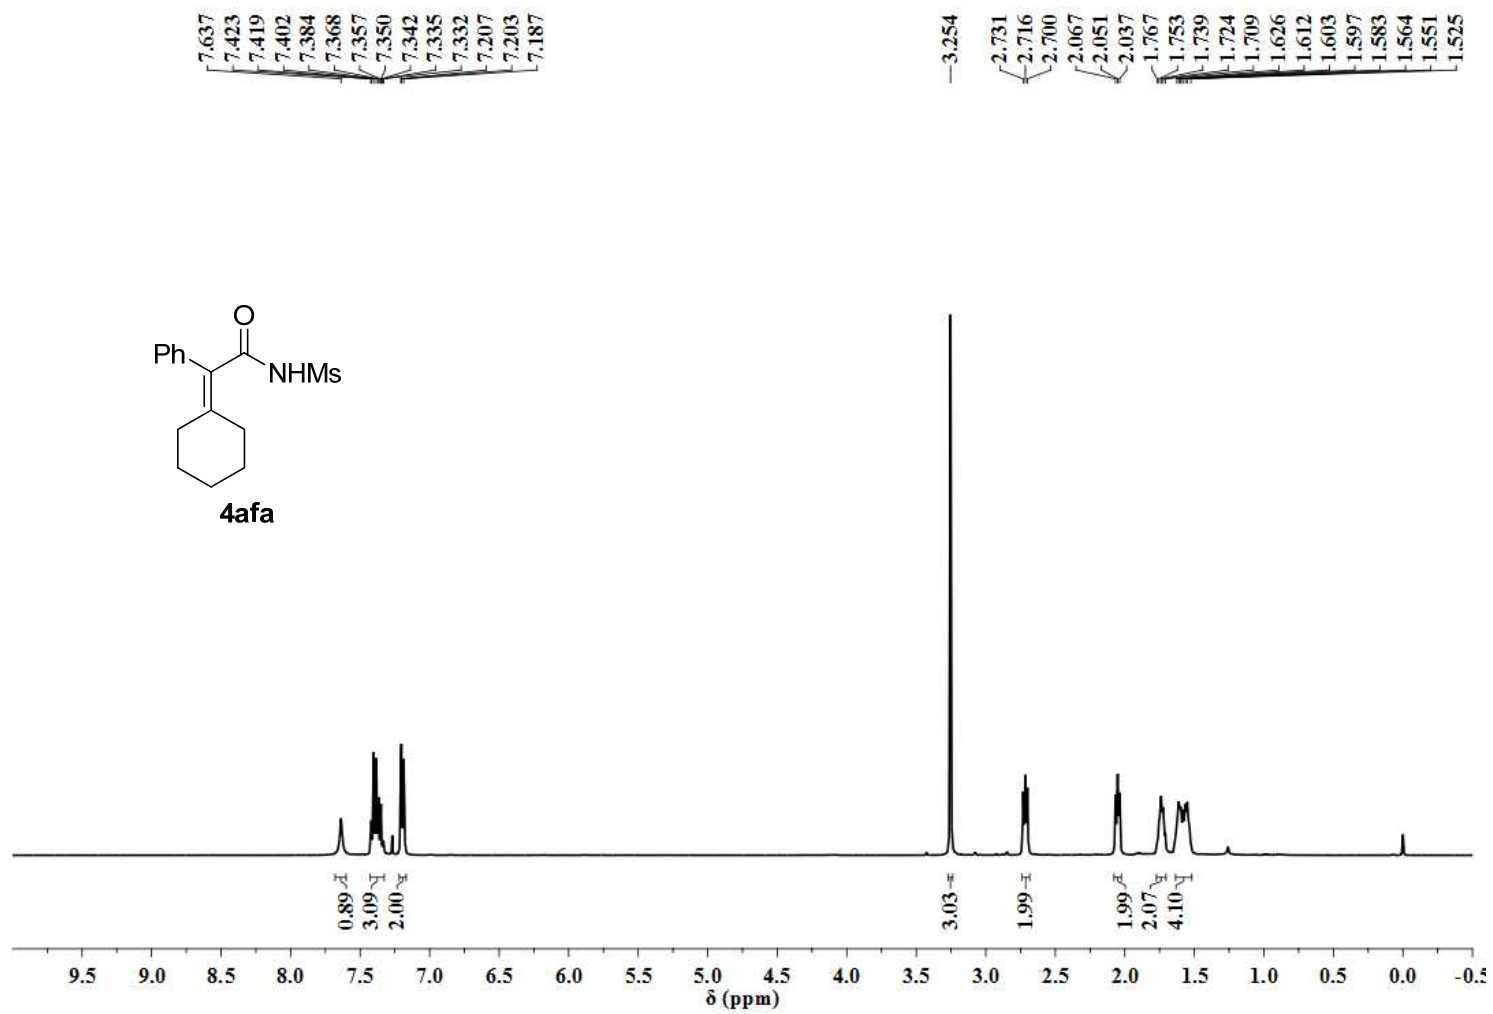

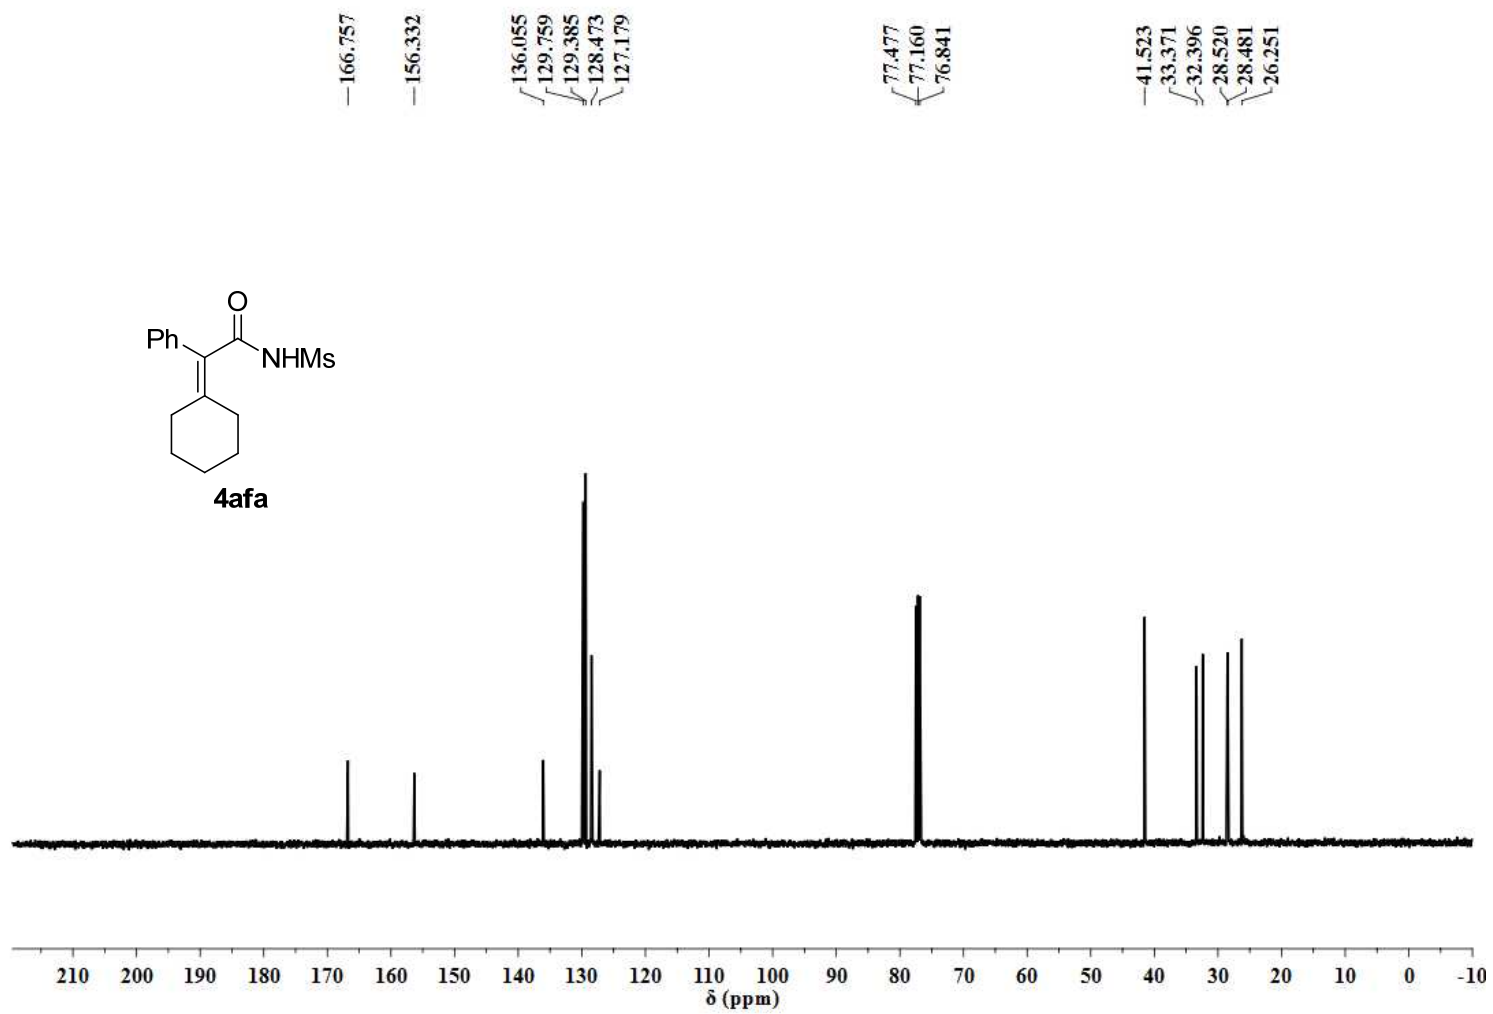

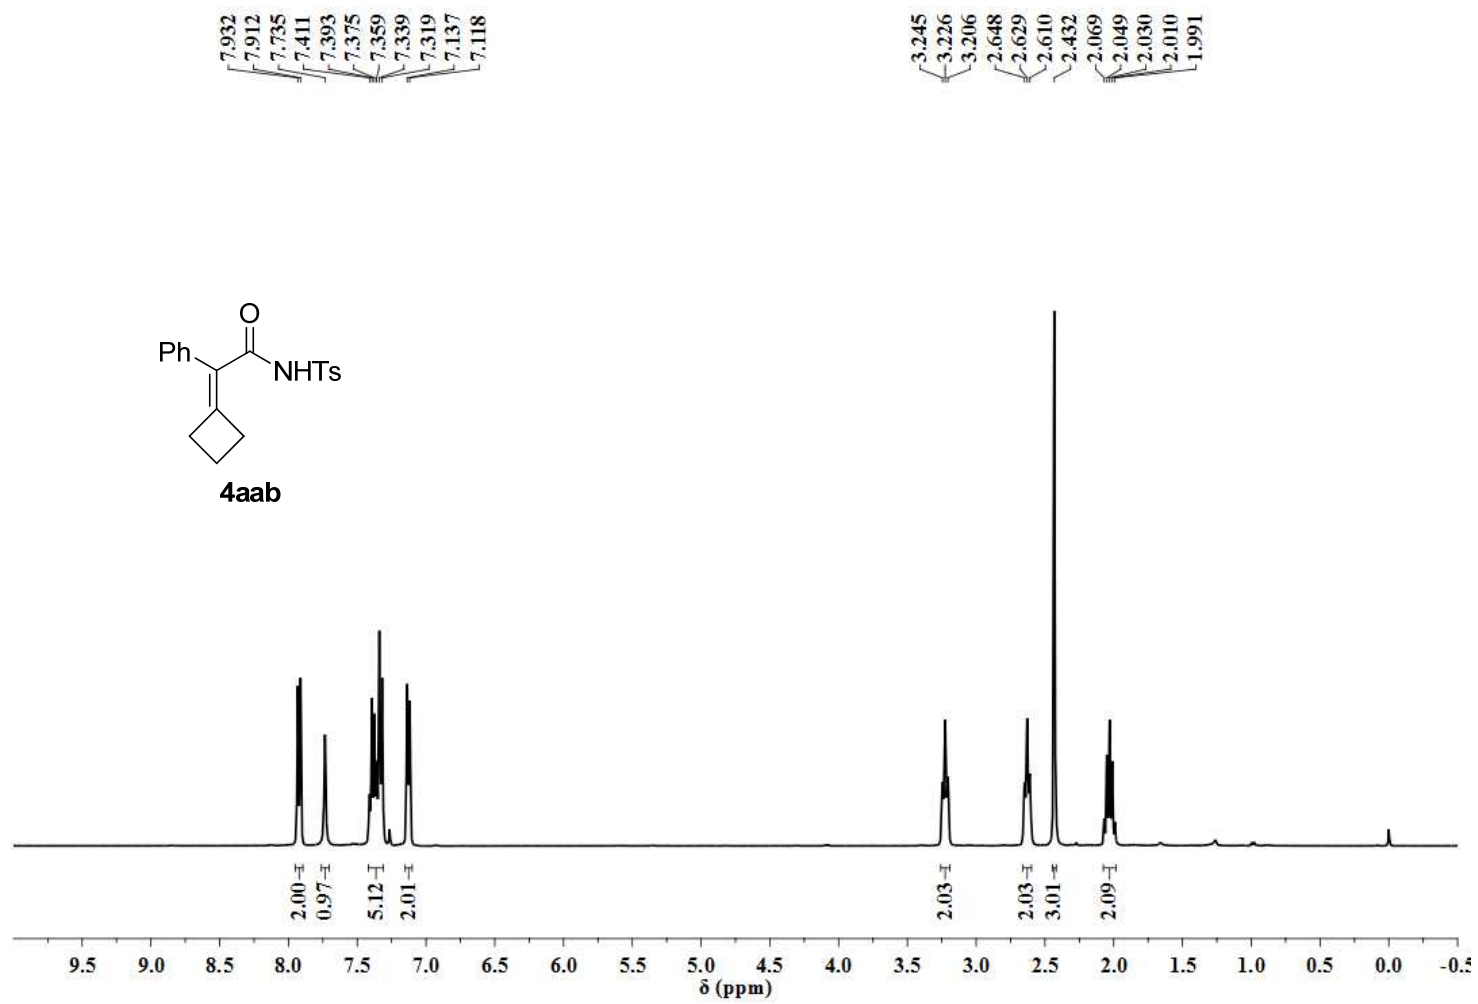

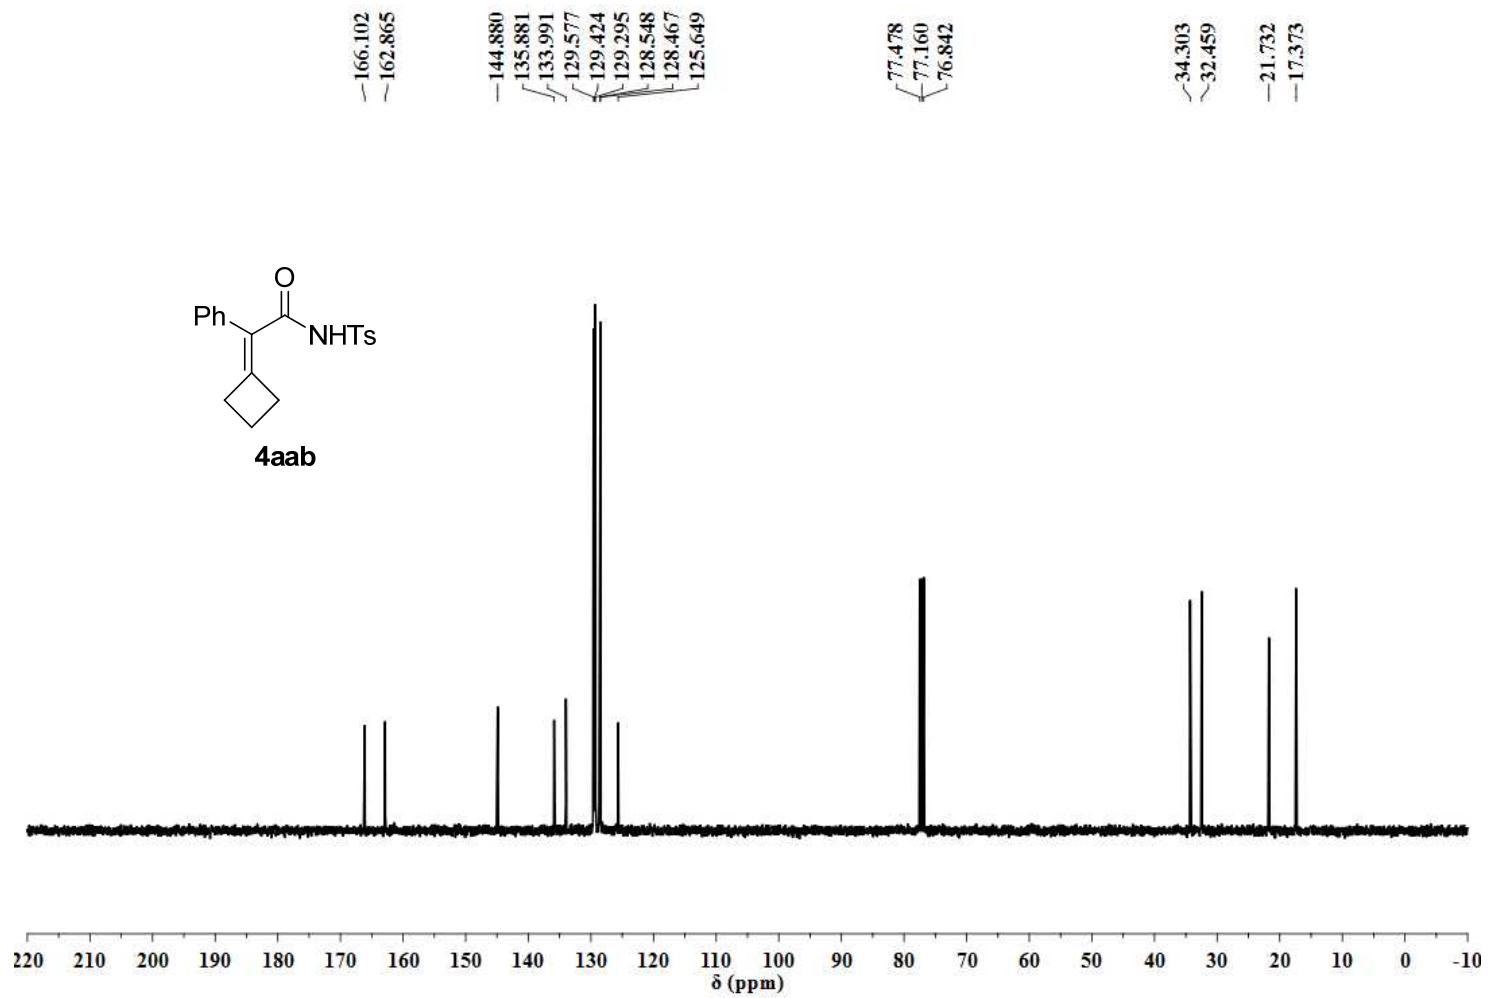

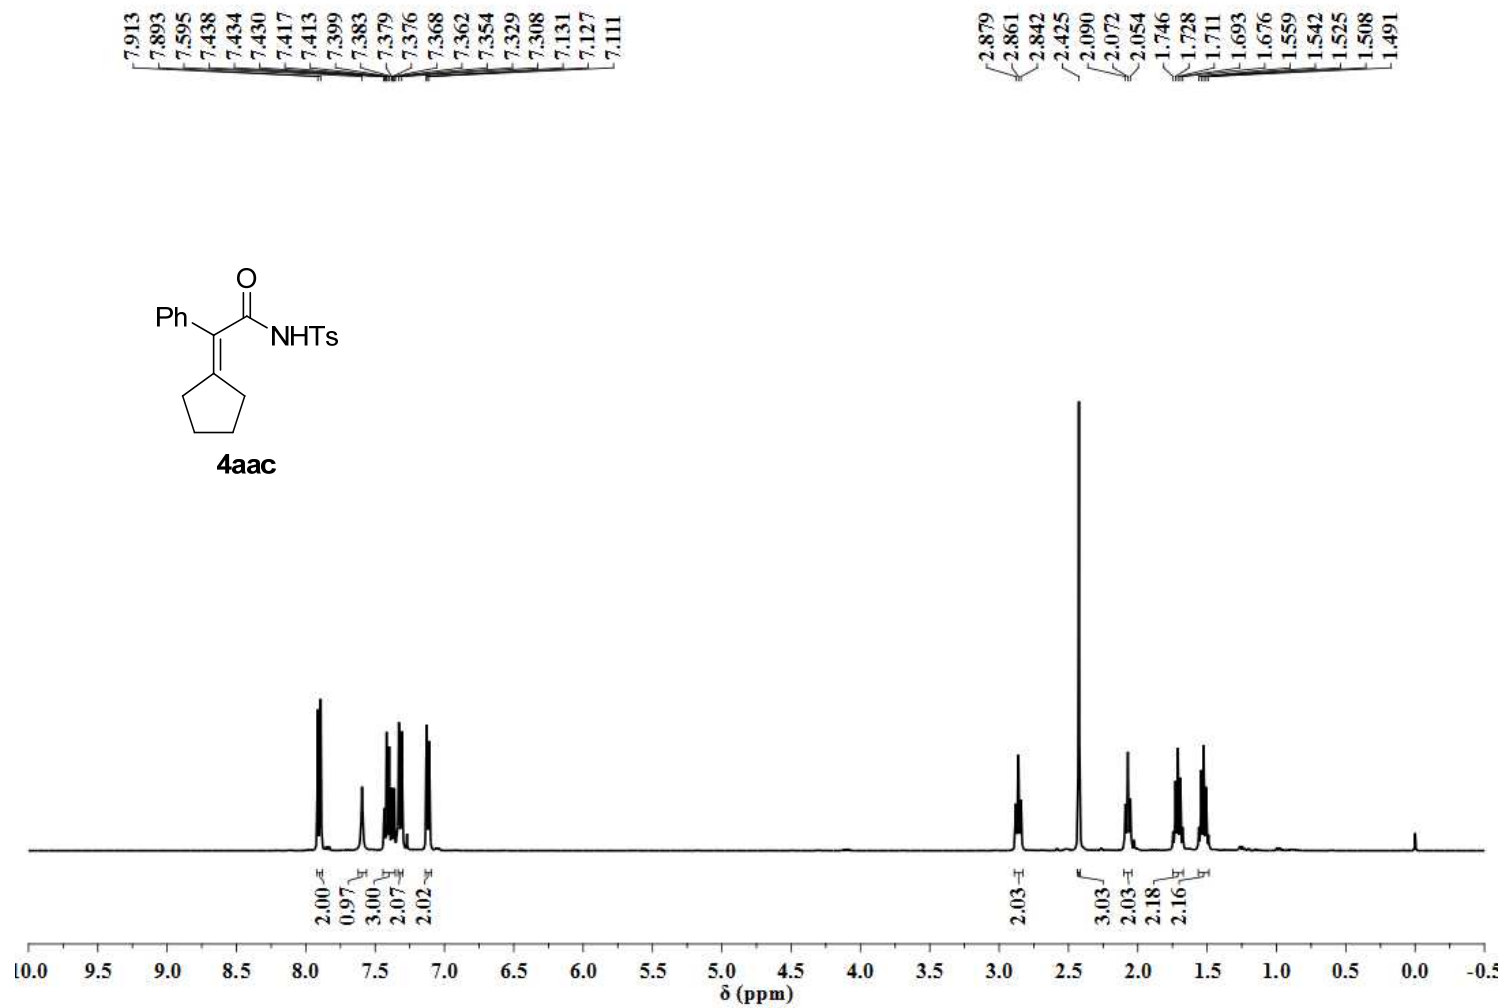

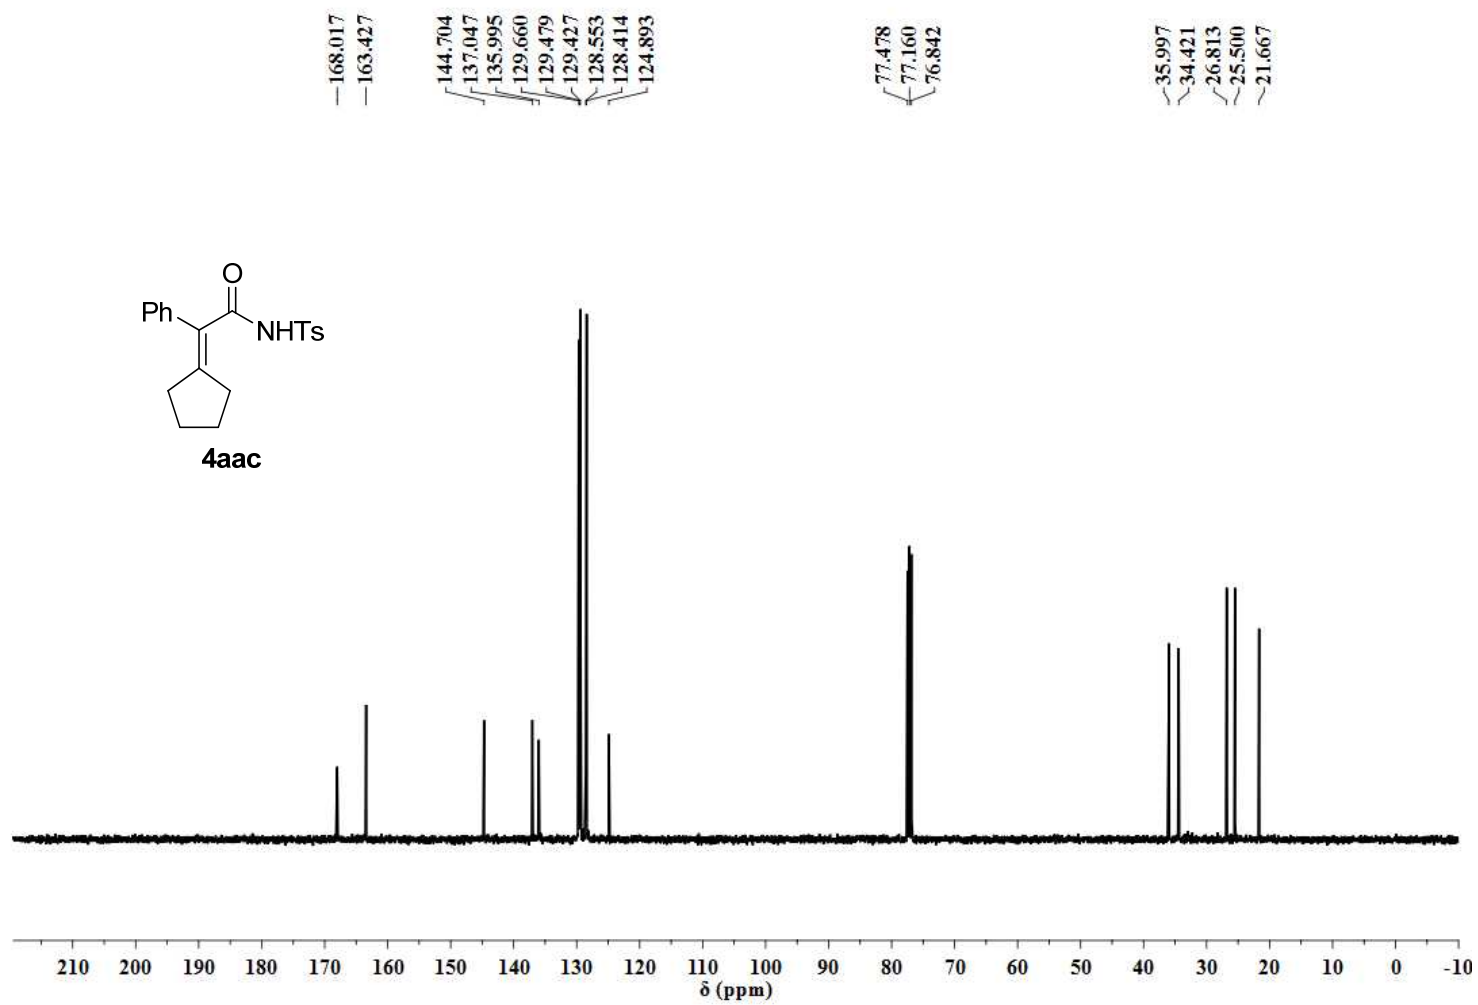

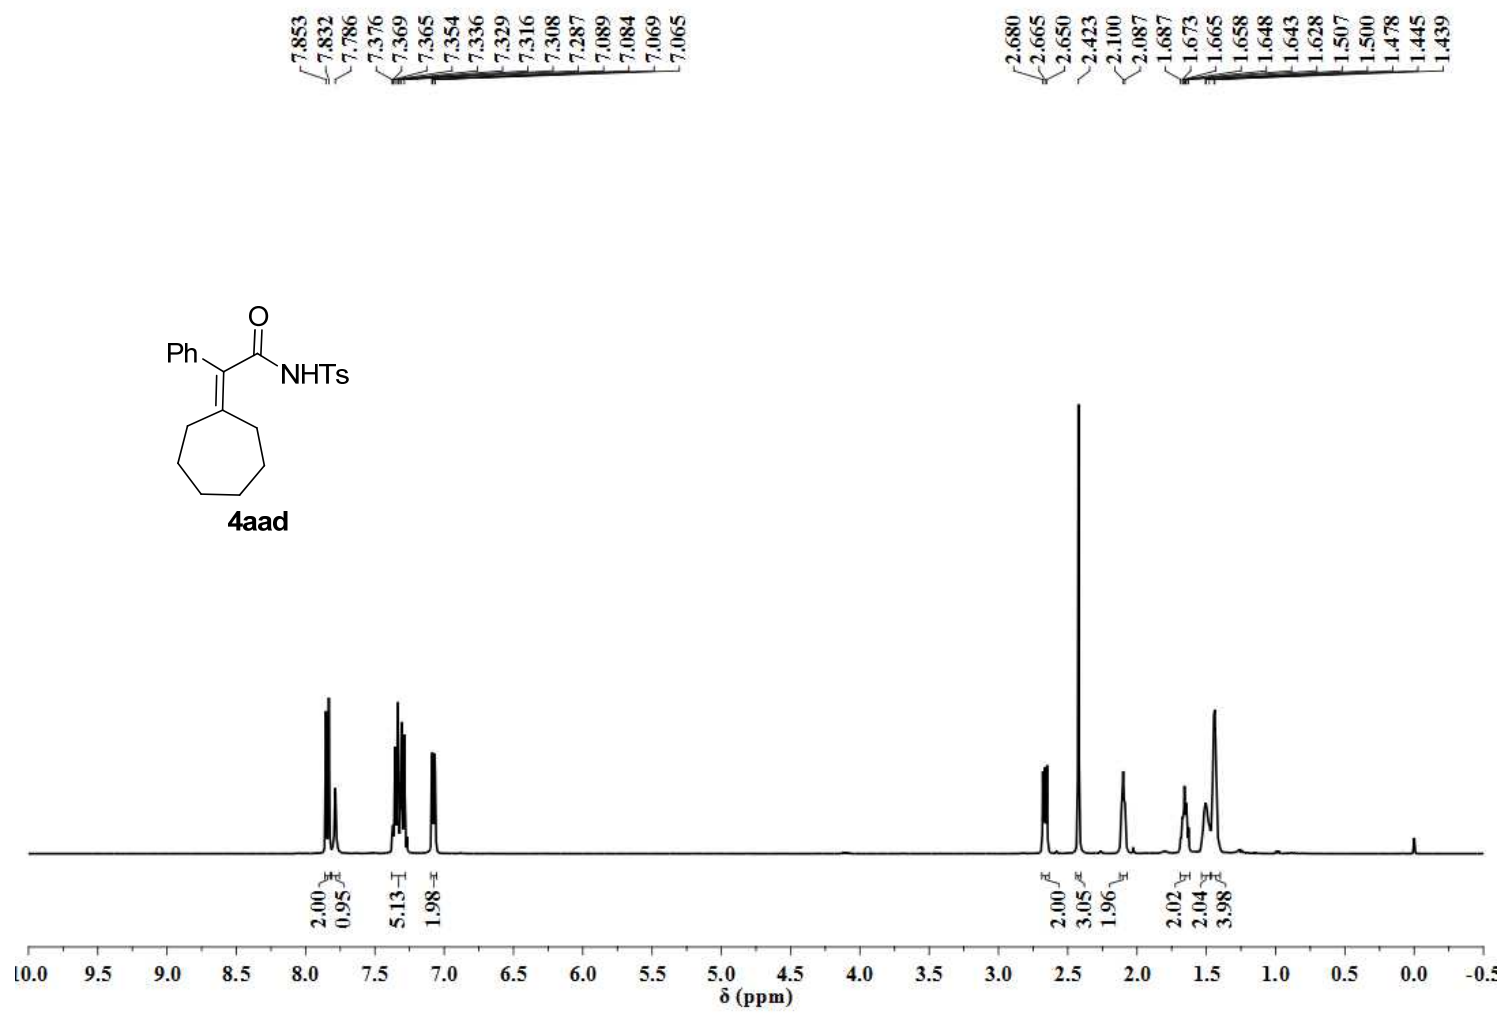

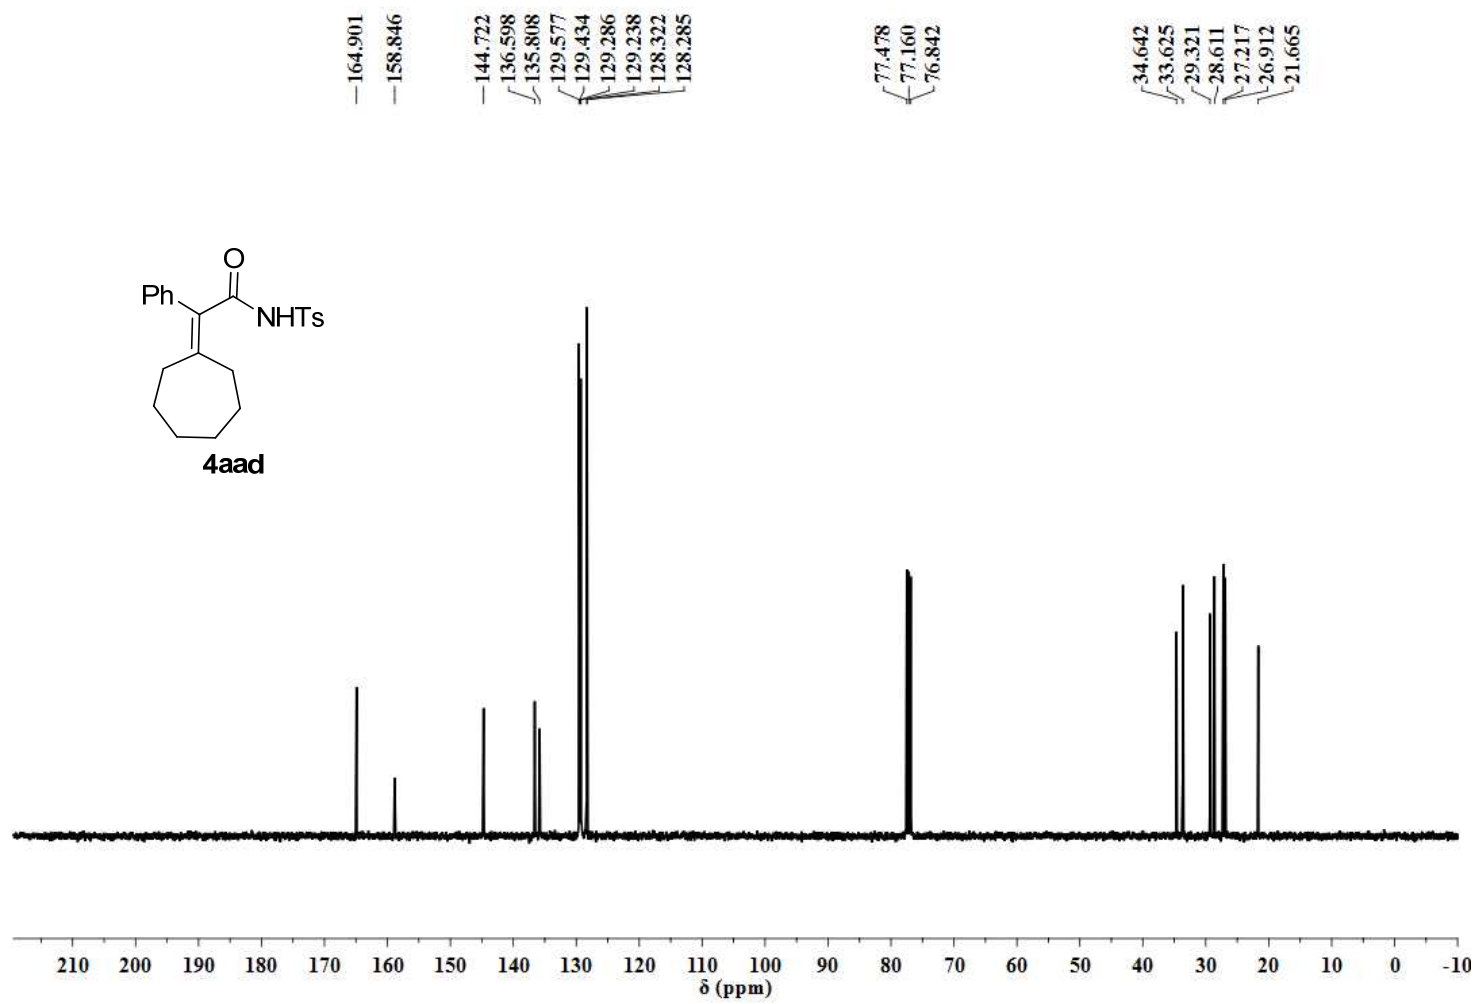



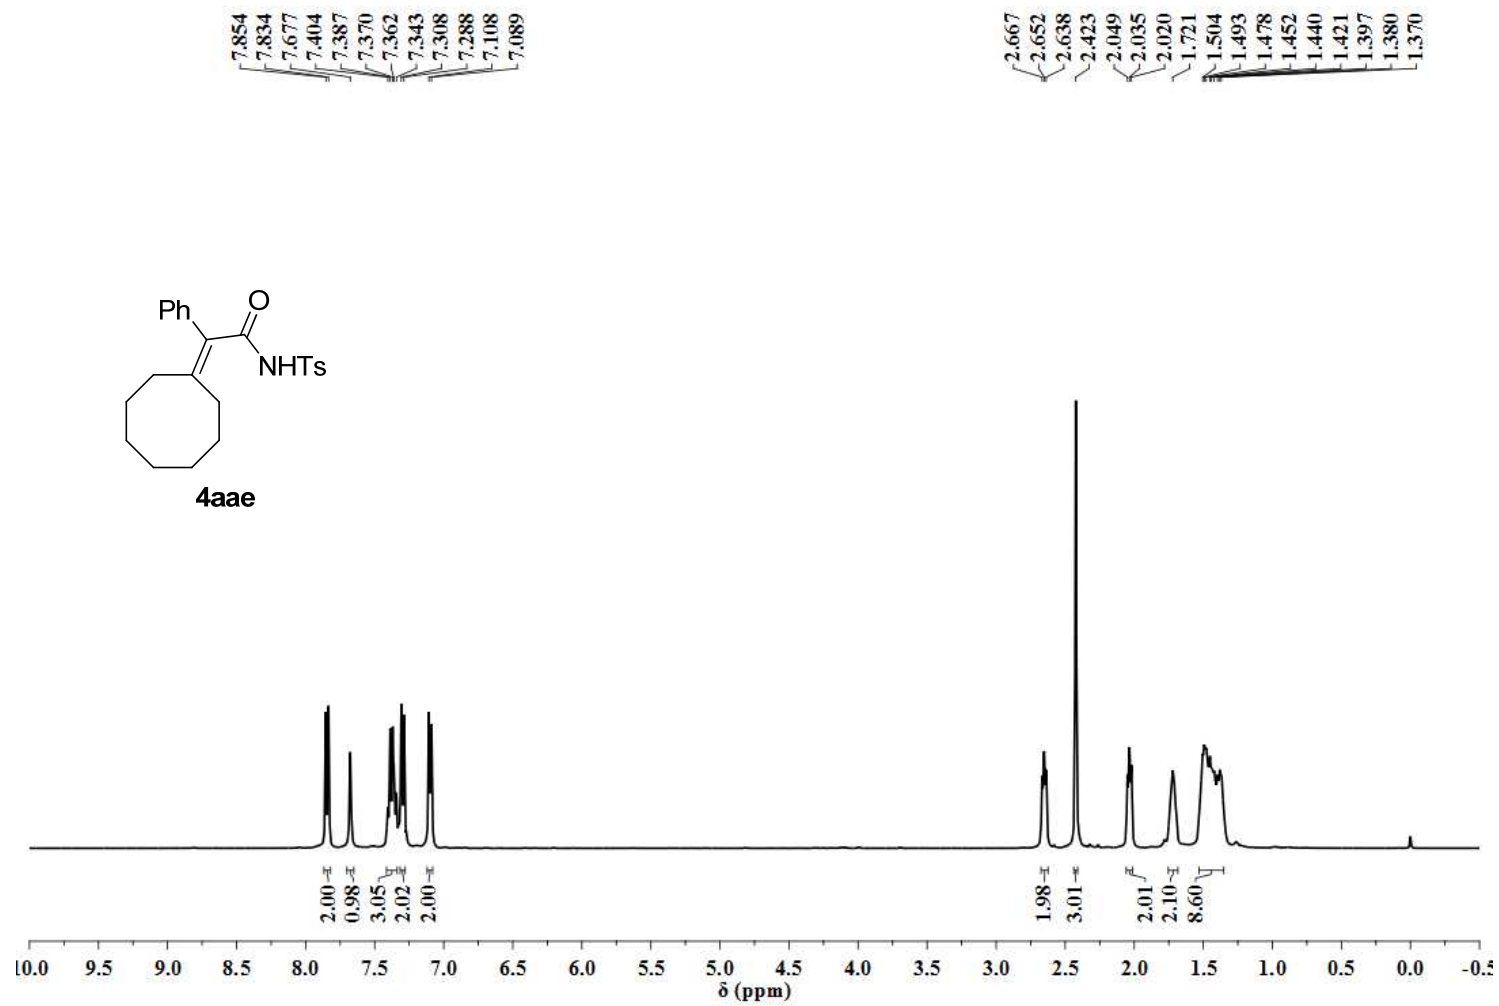

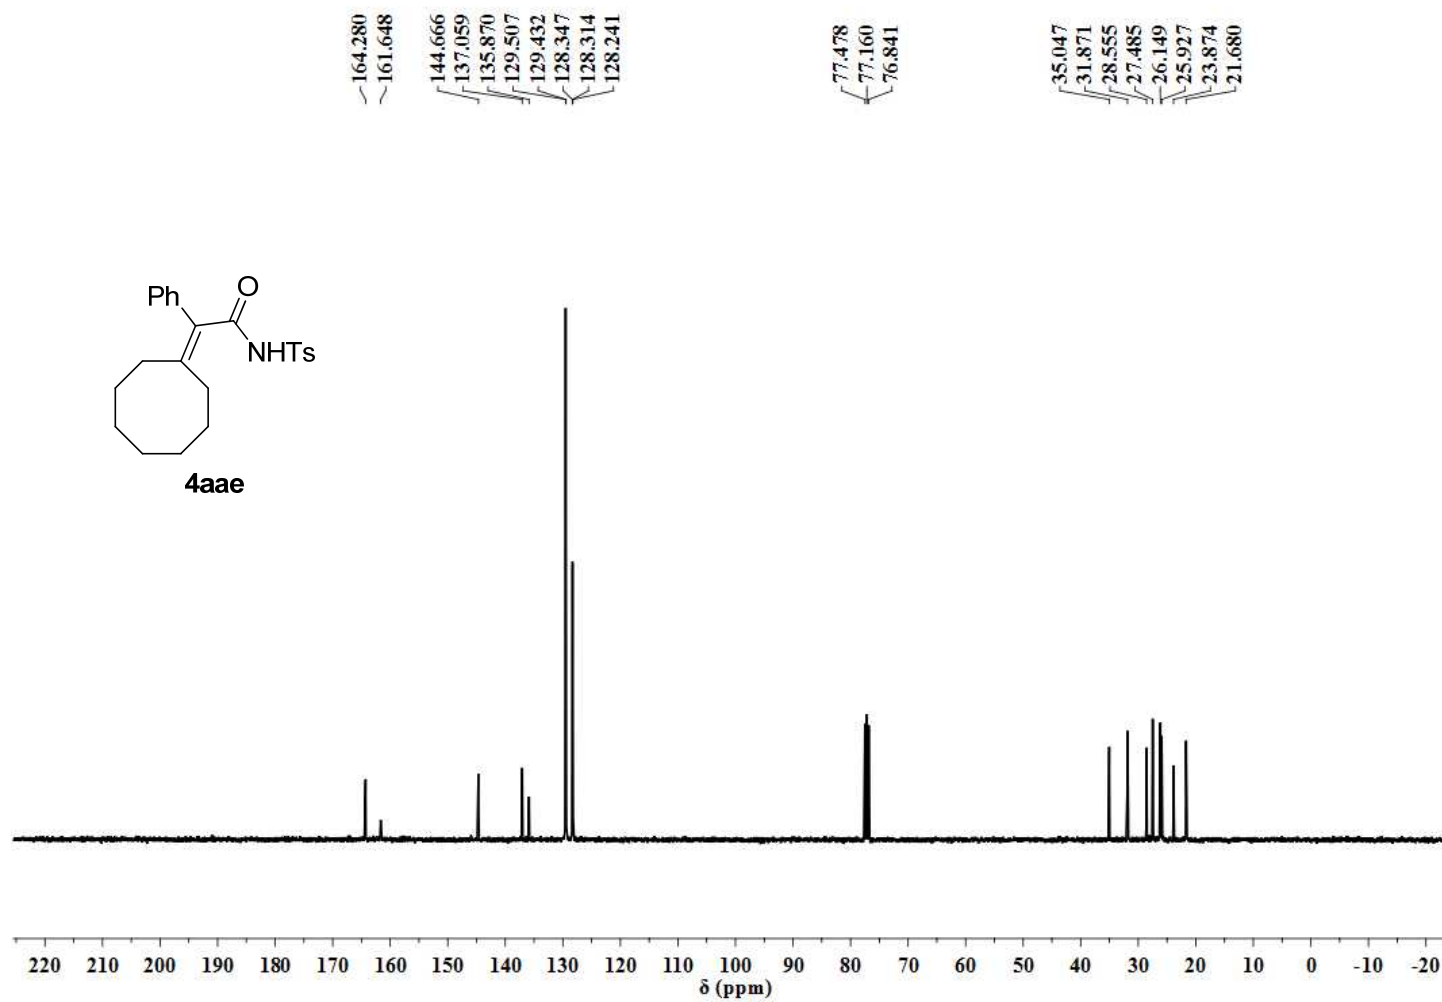

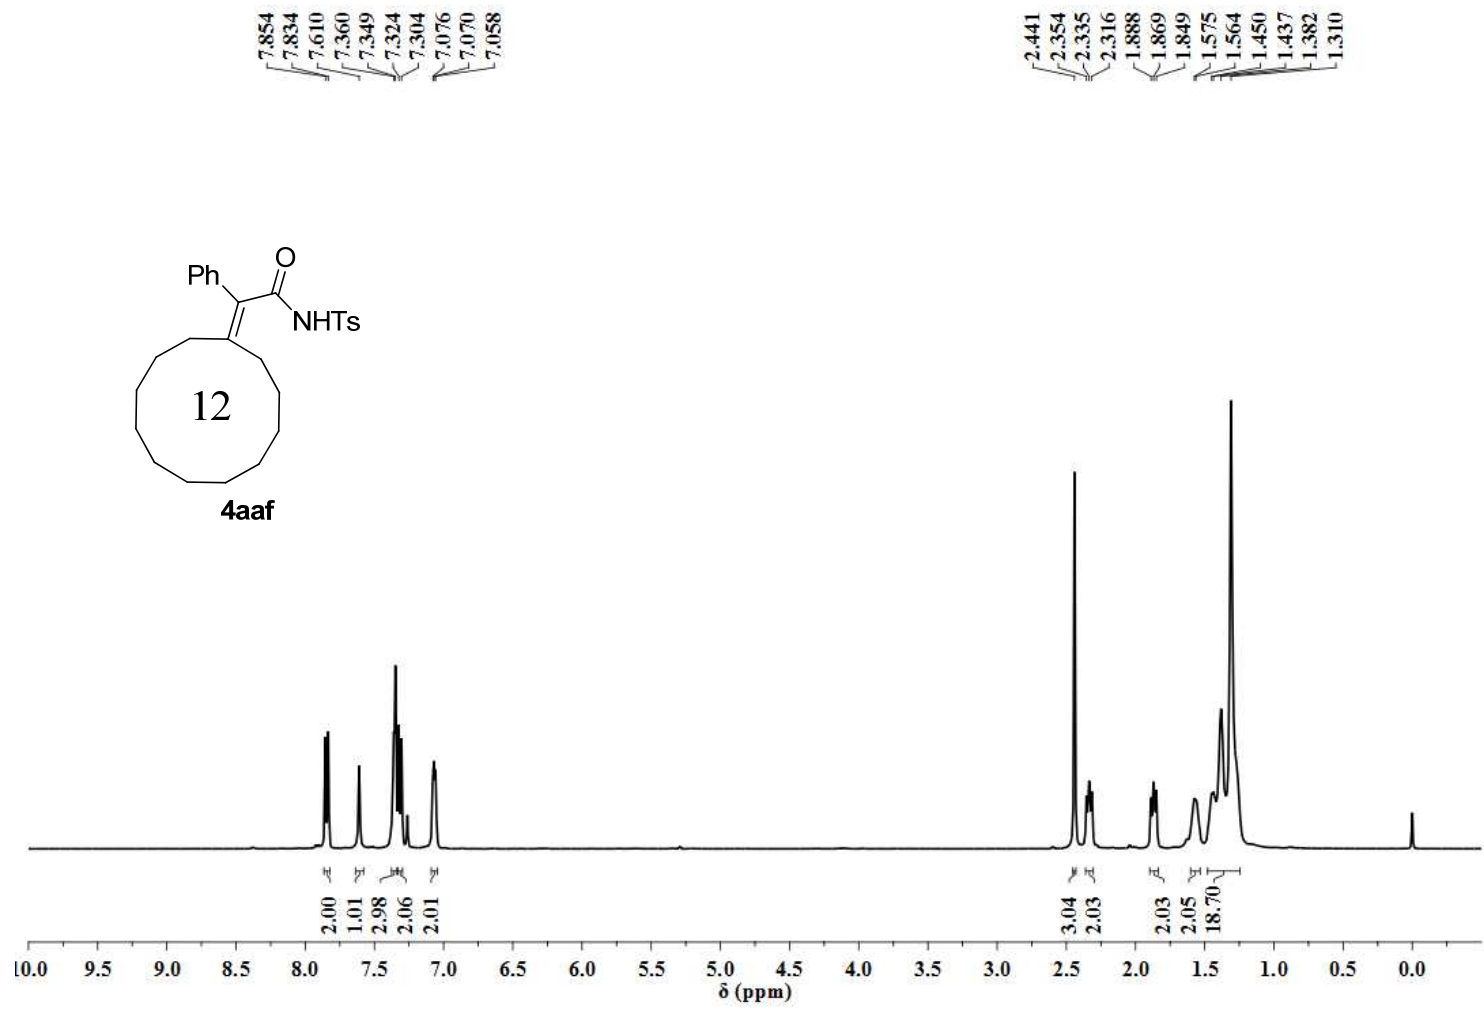

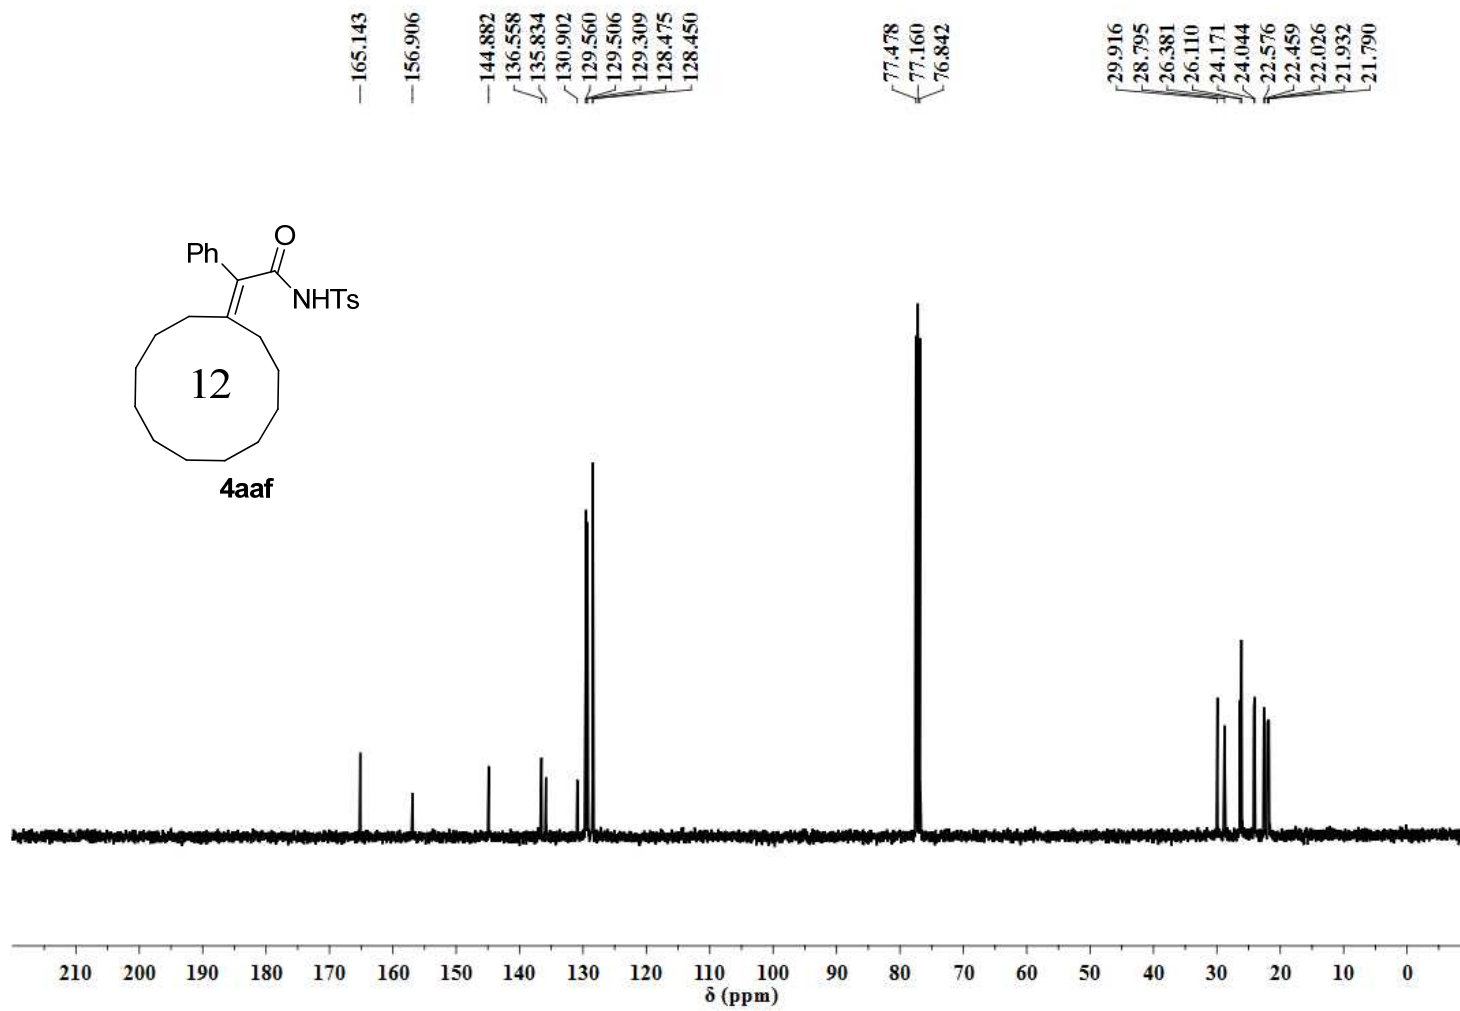

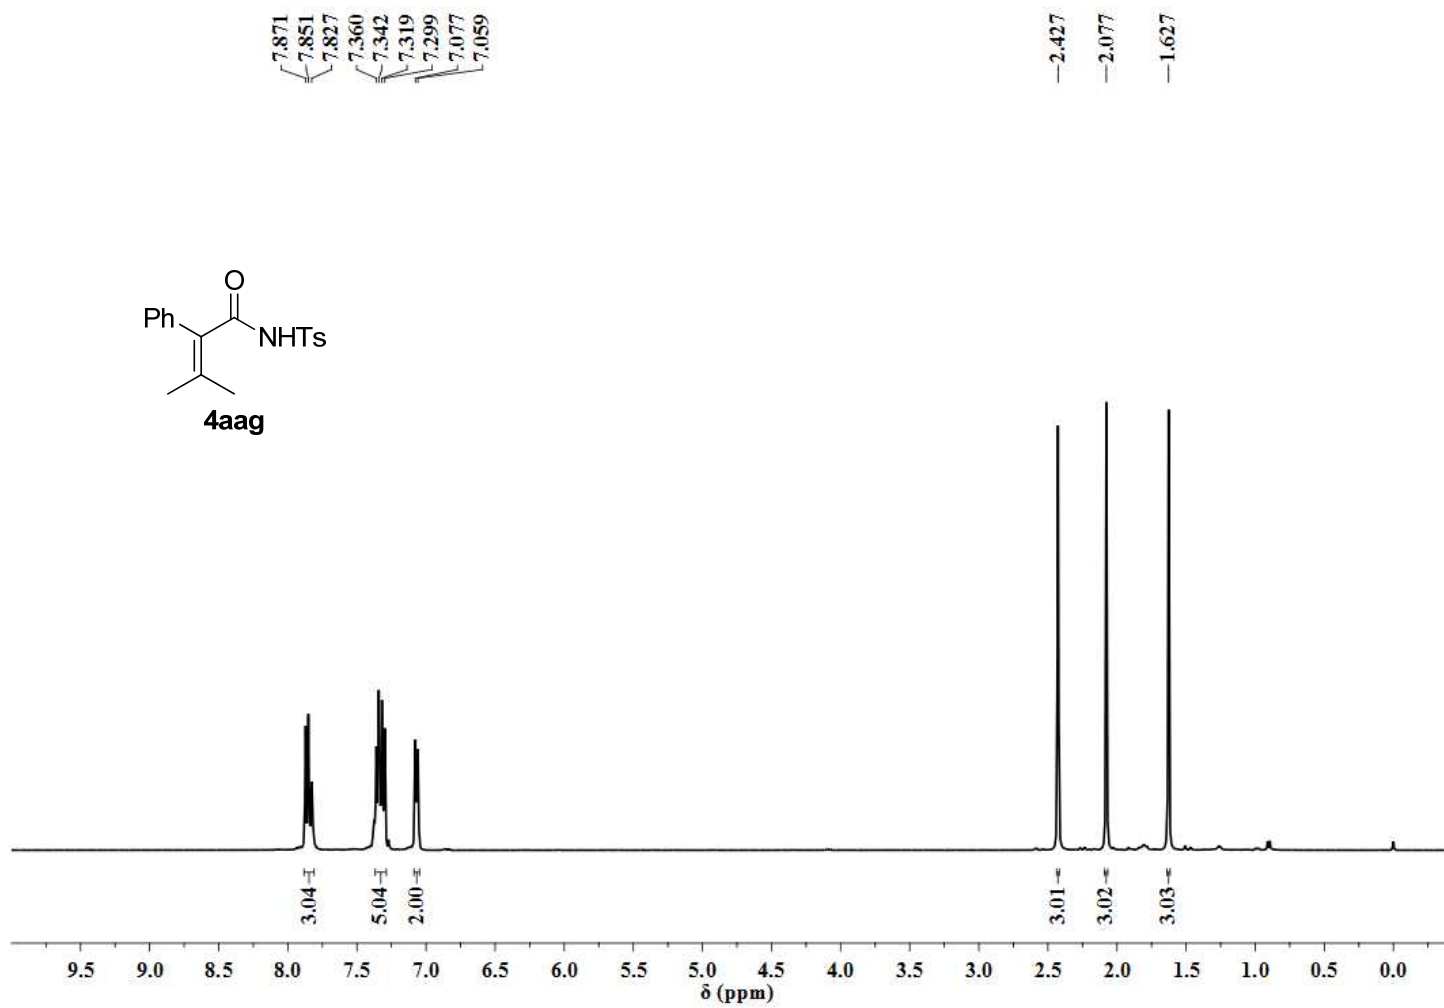

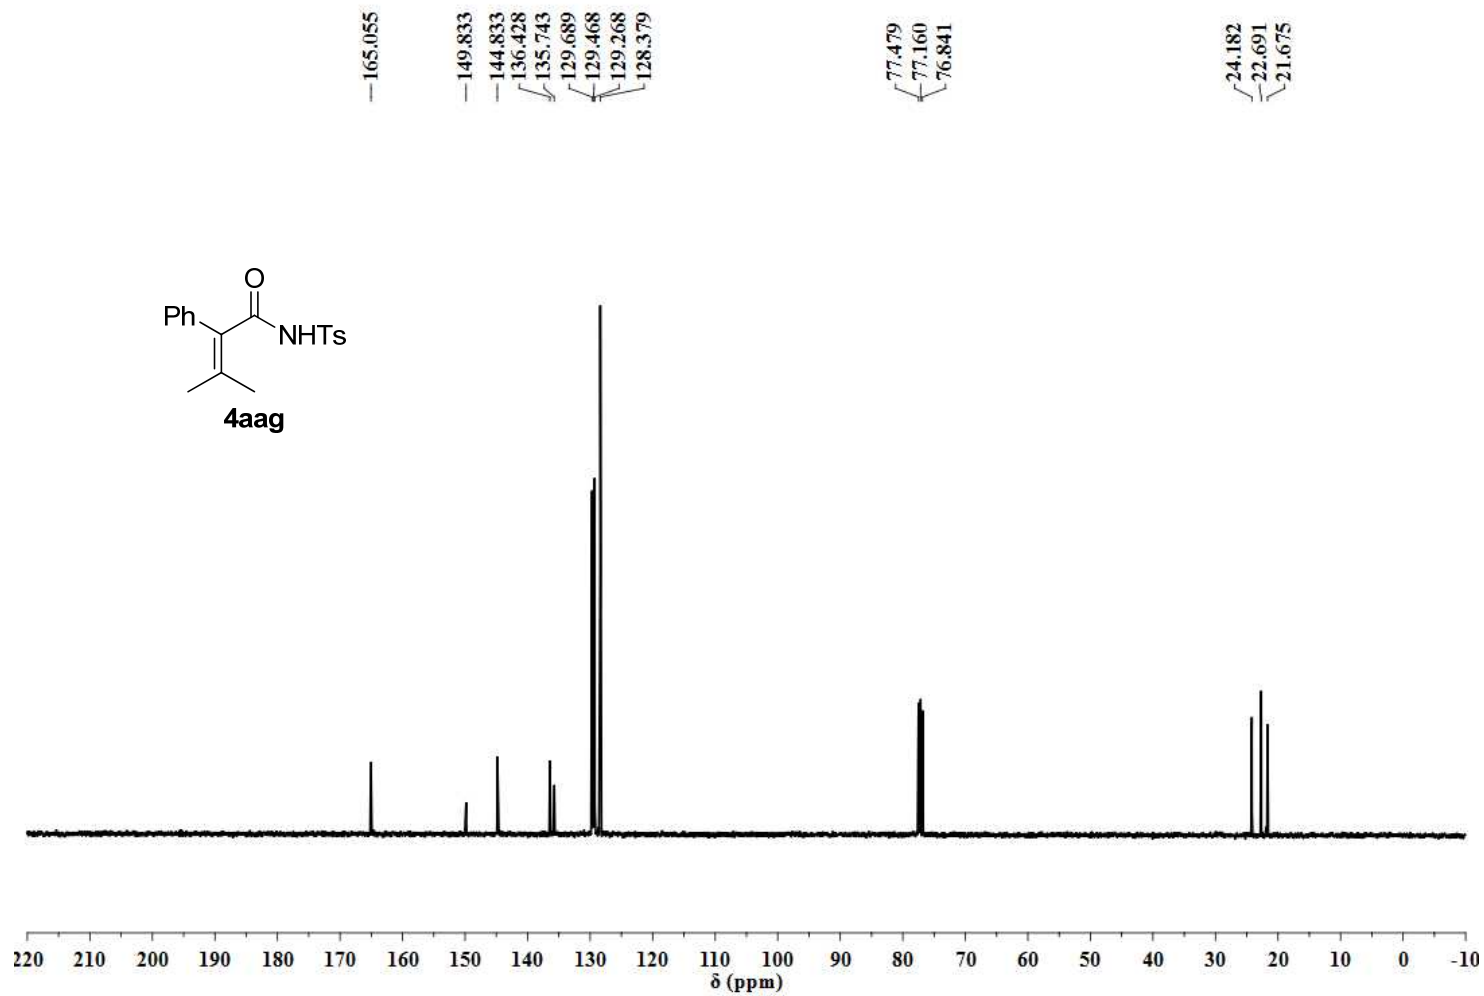

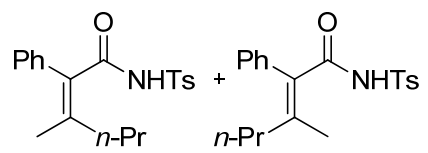

**4ahh:4ahh' = 1.9:1**

7.909  
7.859  
7.840  
7.364  
7.347  
7.332  
7.314  
7.295  
7.078  
7.062

2.429  
2.337  
2.318  
2.298  
2.062  
1.874  
1.856  
1.836  
1.610  
1.507  
1.488  
1.470  
1.450  
1.432  
1.414  
1.390  
1.372  
1.353  
1.334  
1.315  
1.297  
0.867  
0.849  
0.831  
0.725  
0.707  
0.689

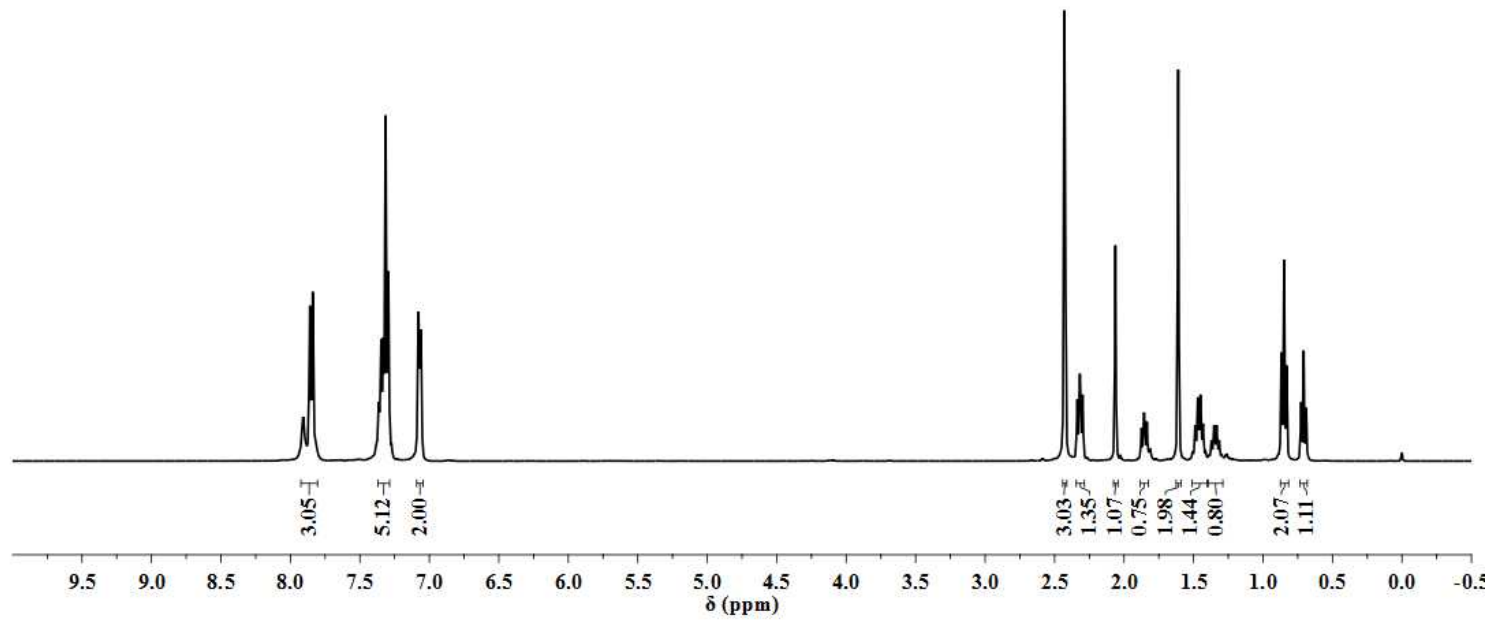

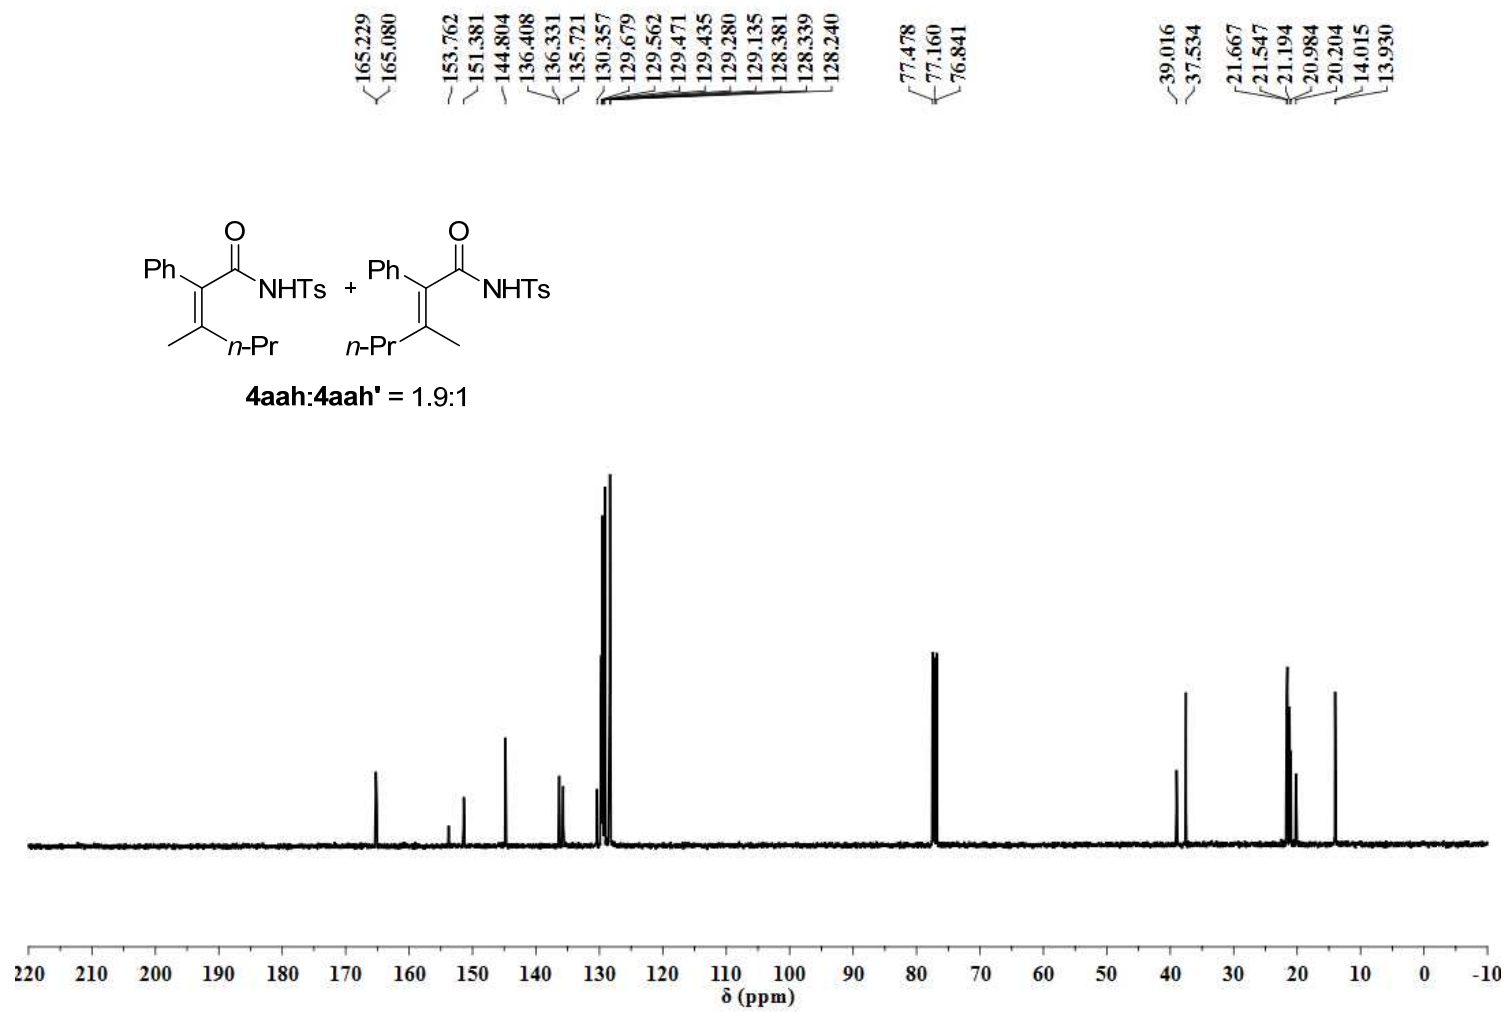



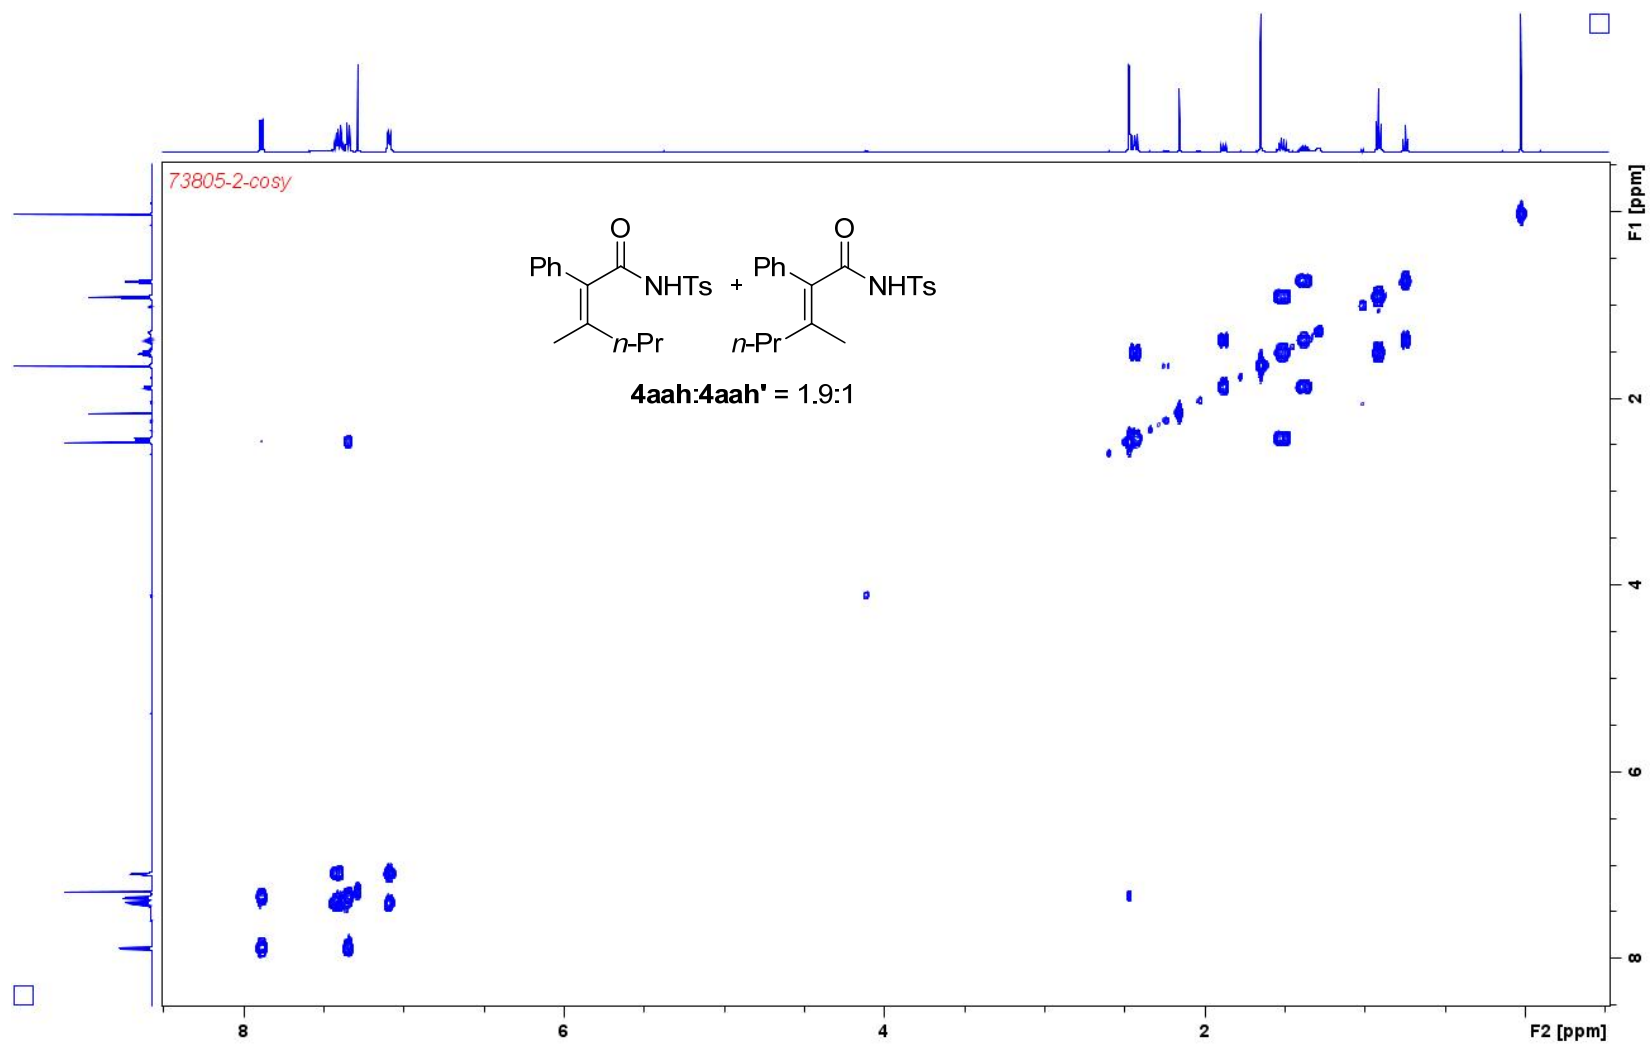



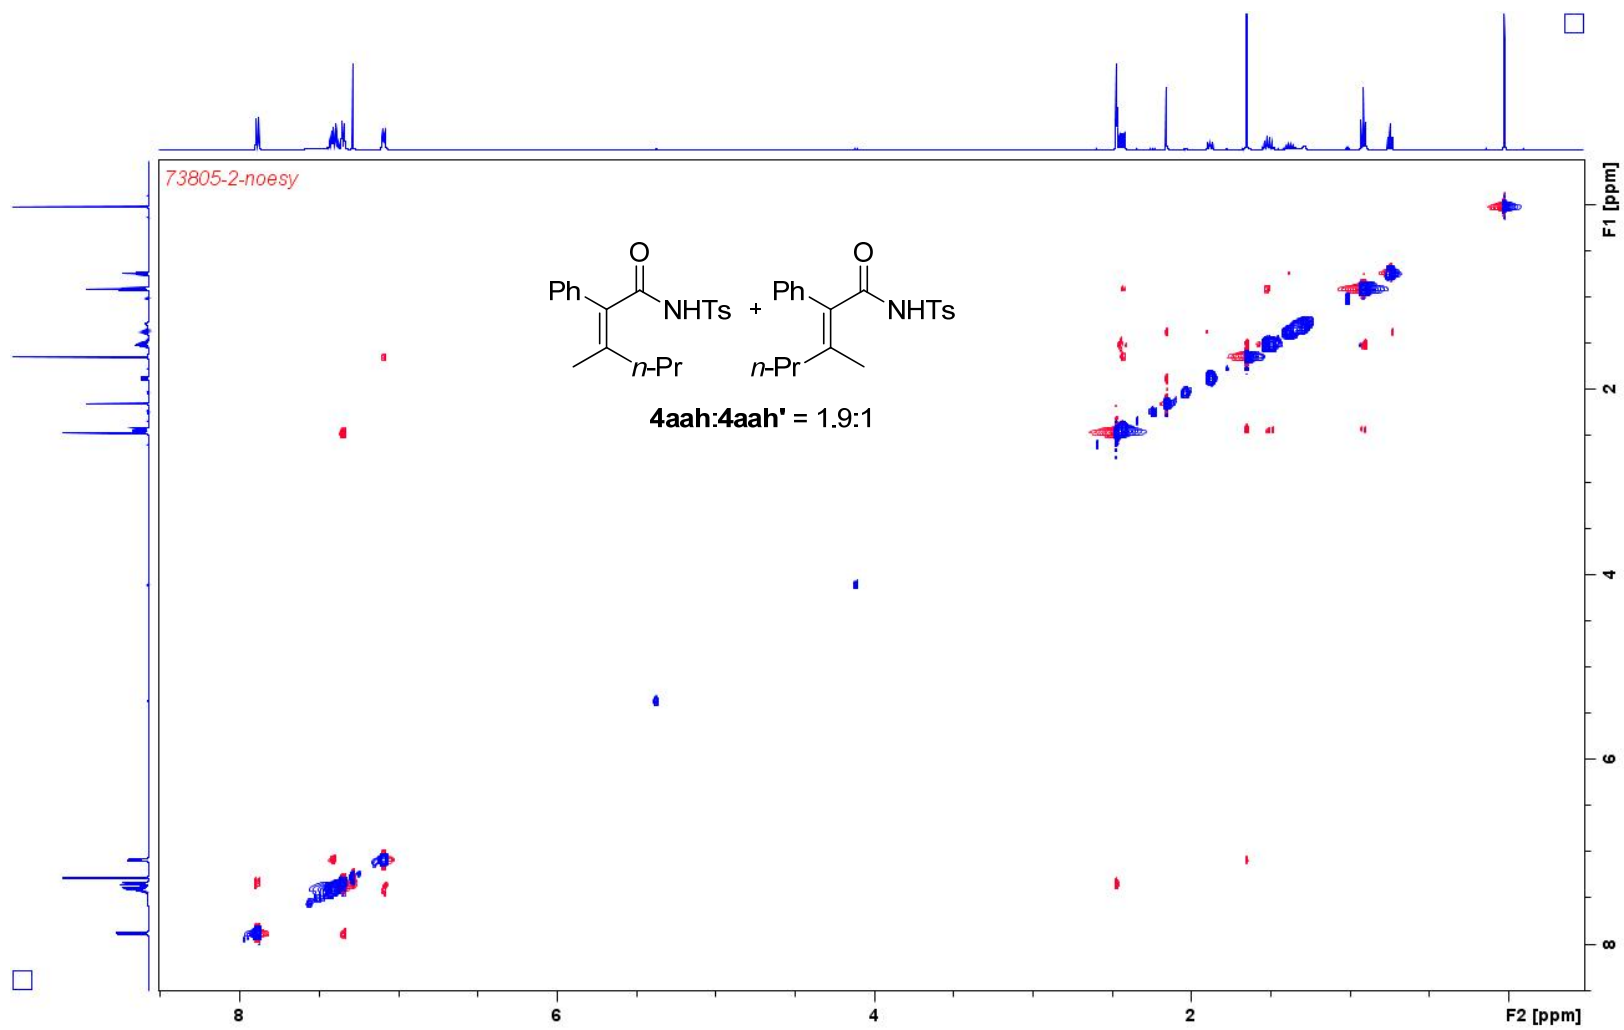

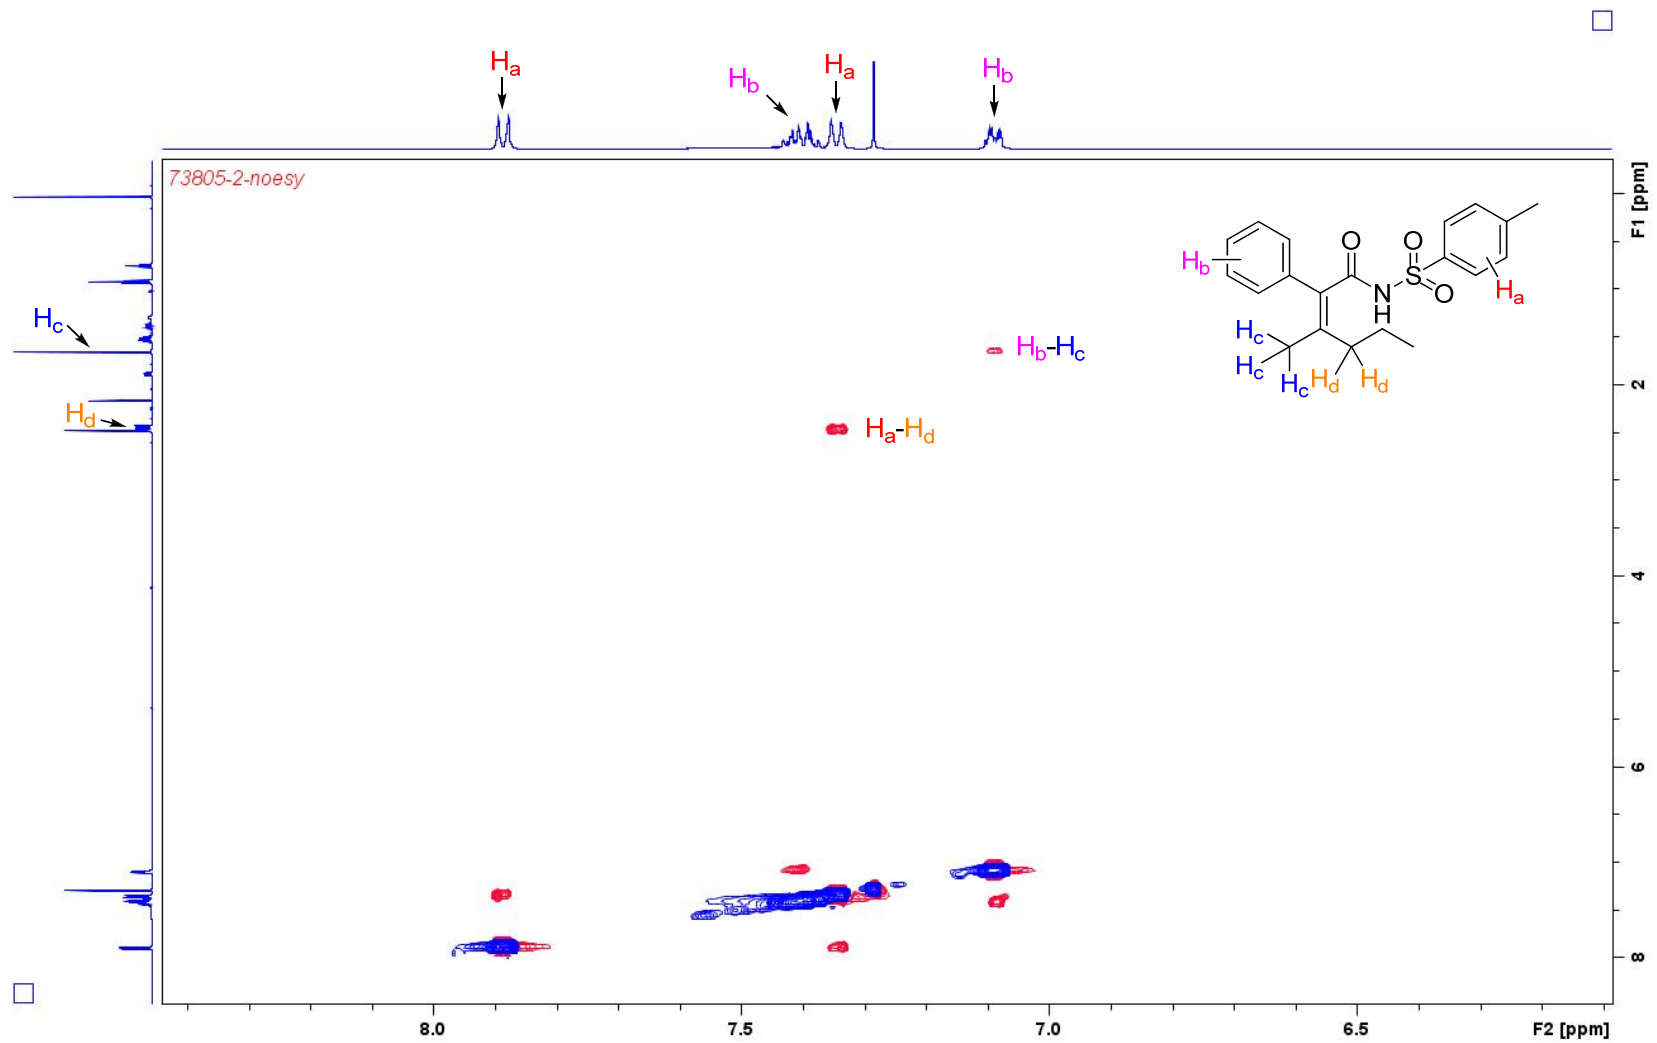

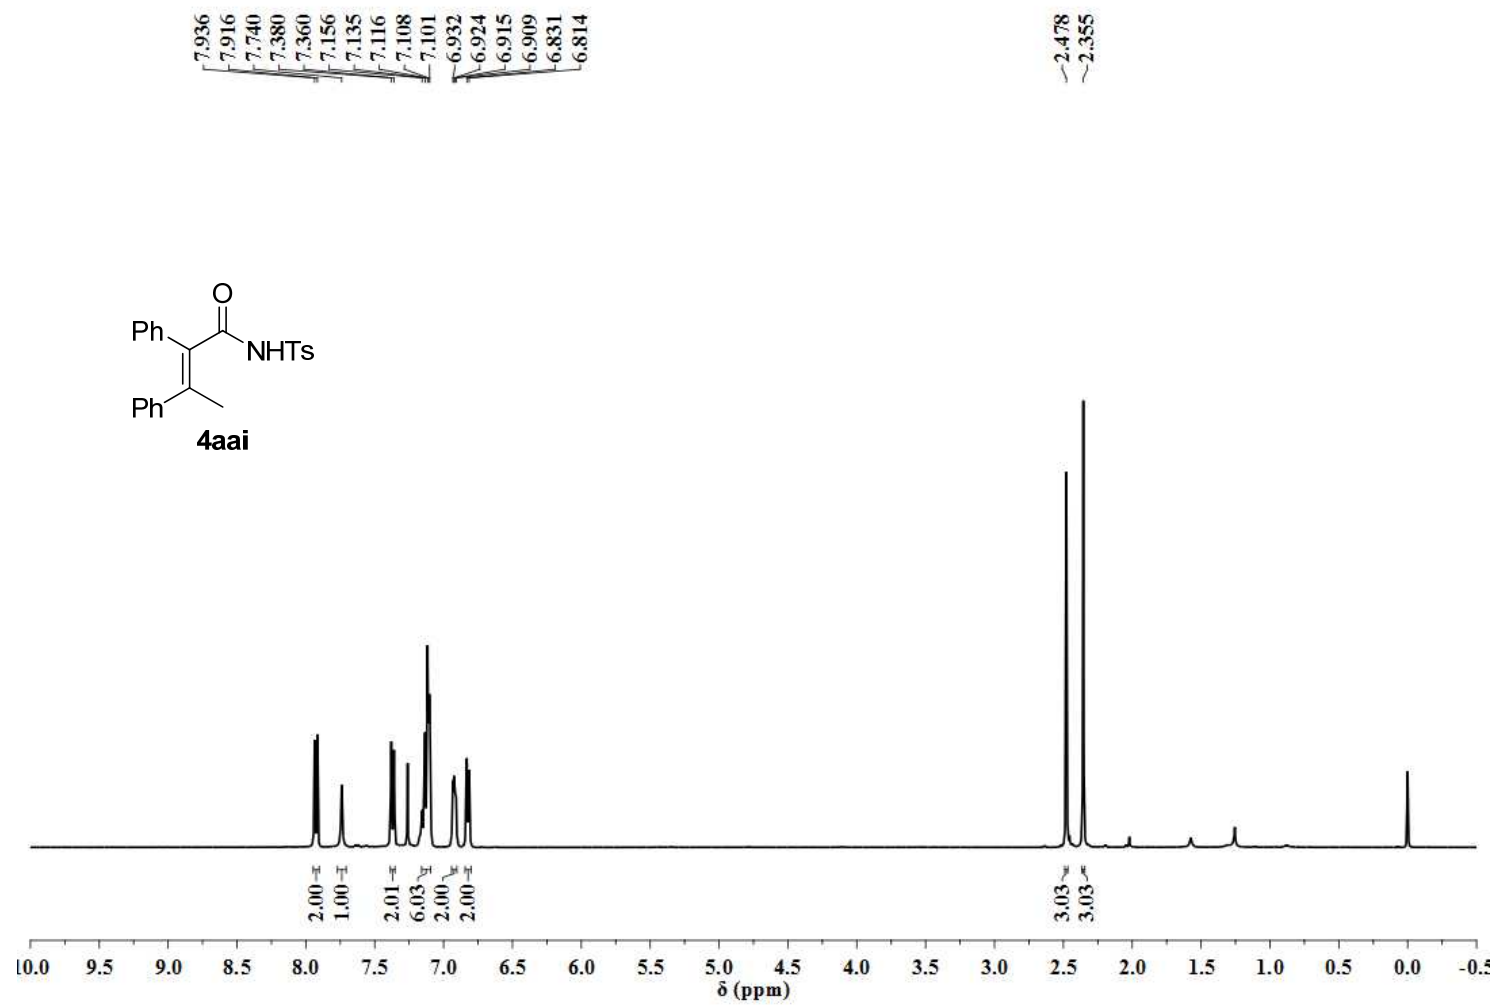

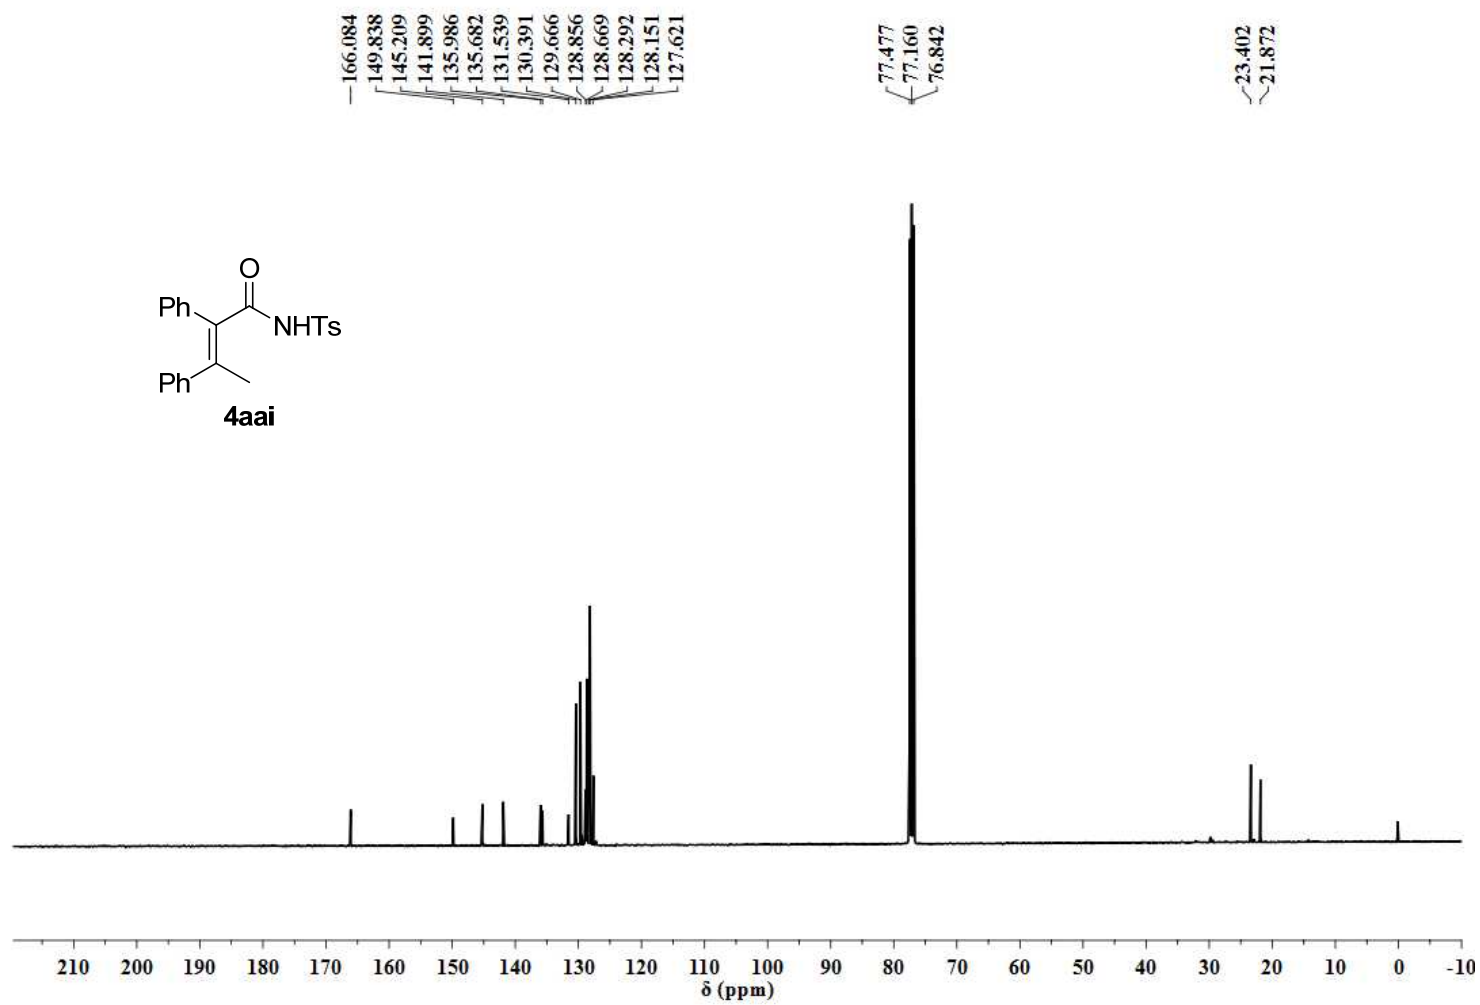

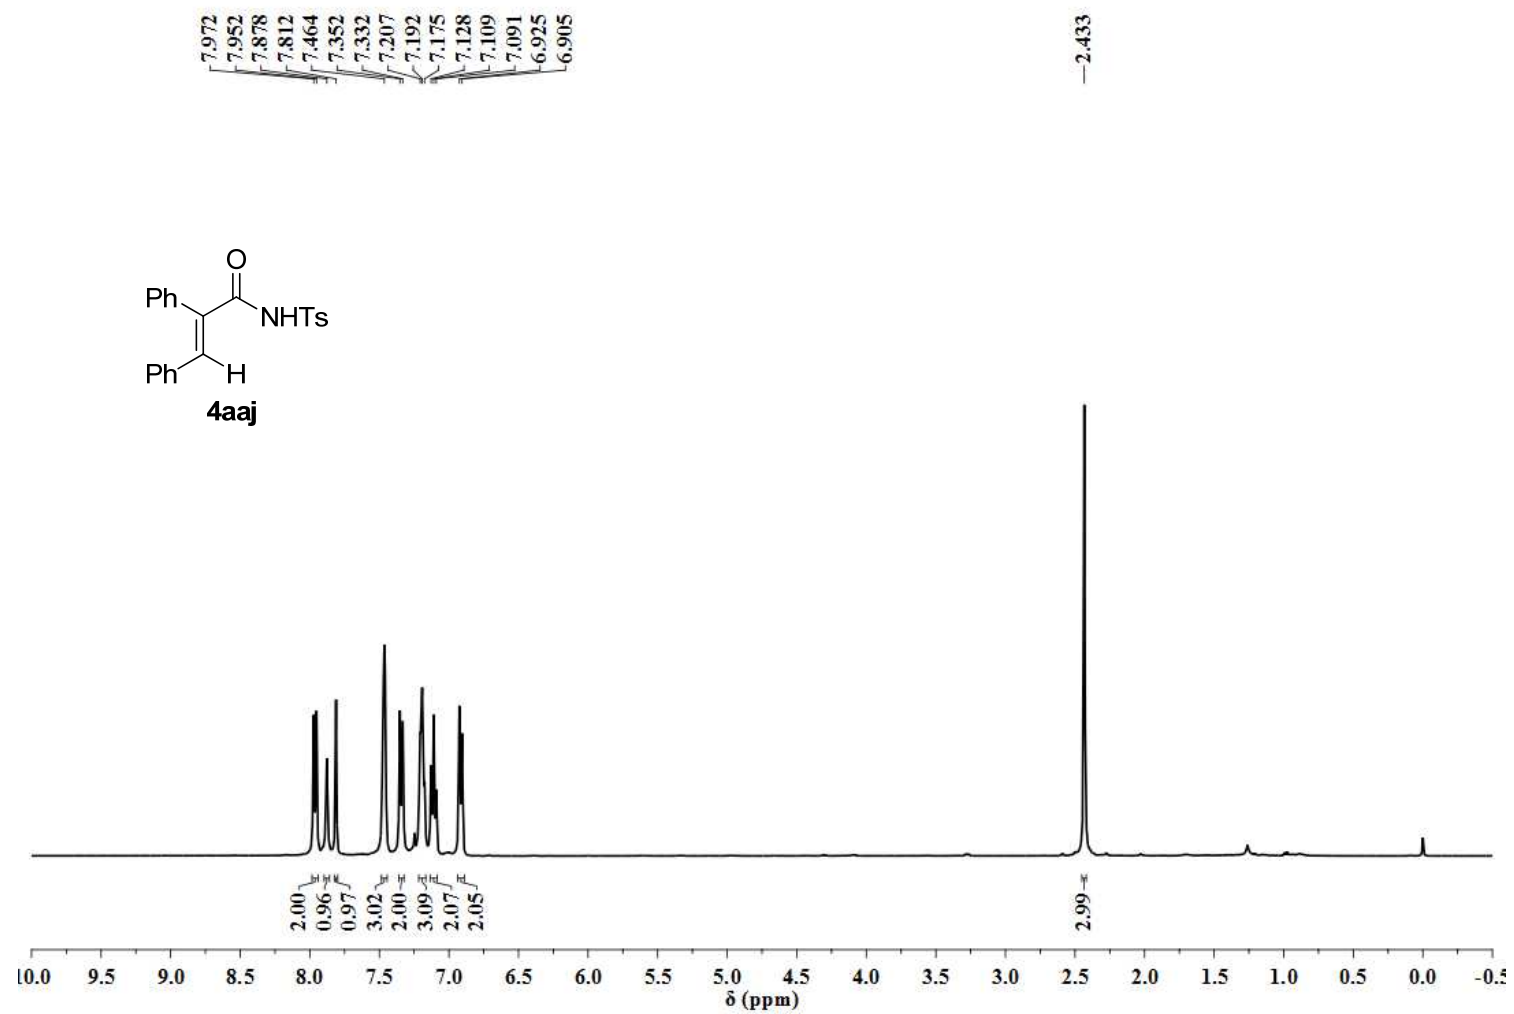

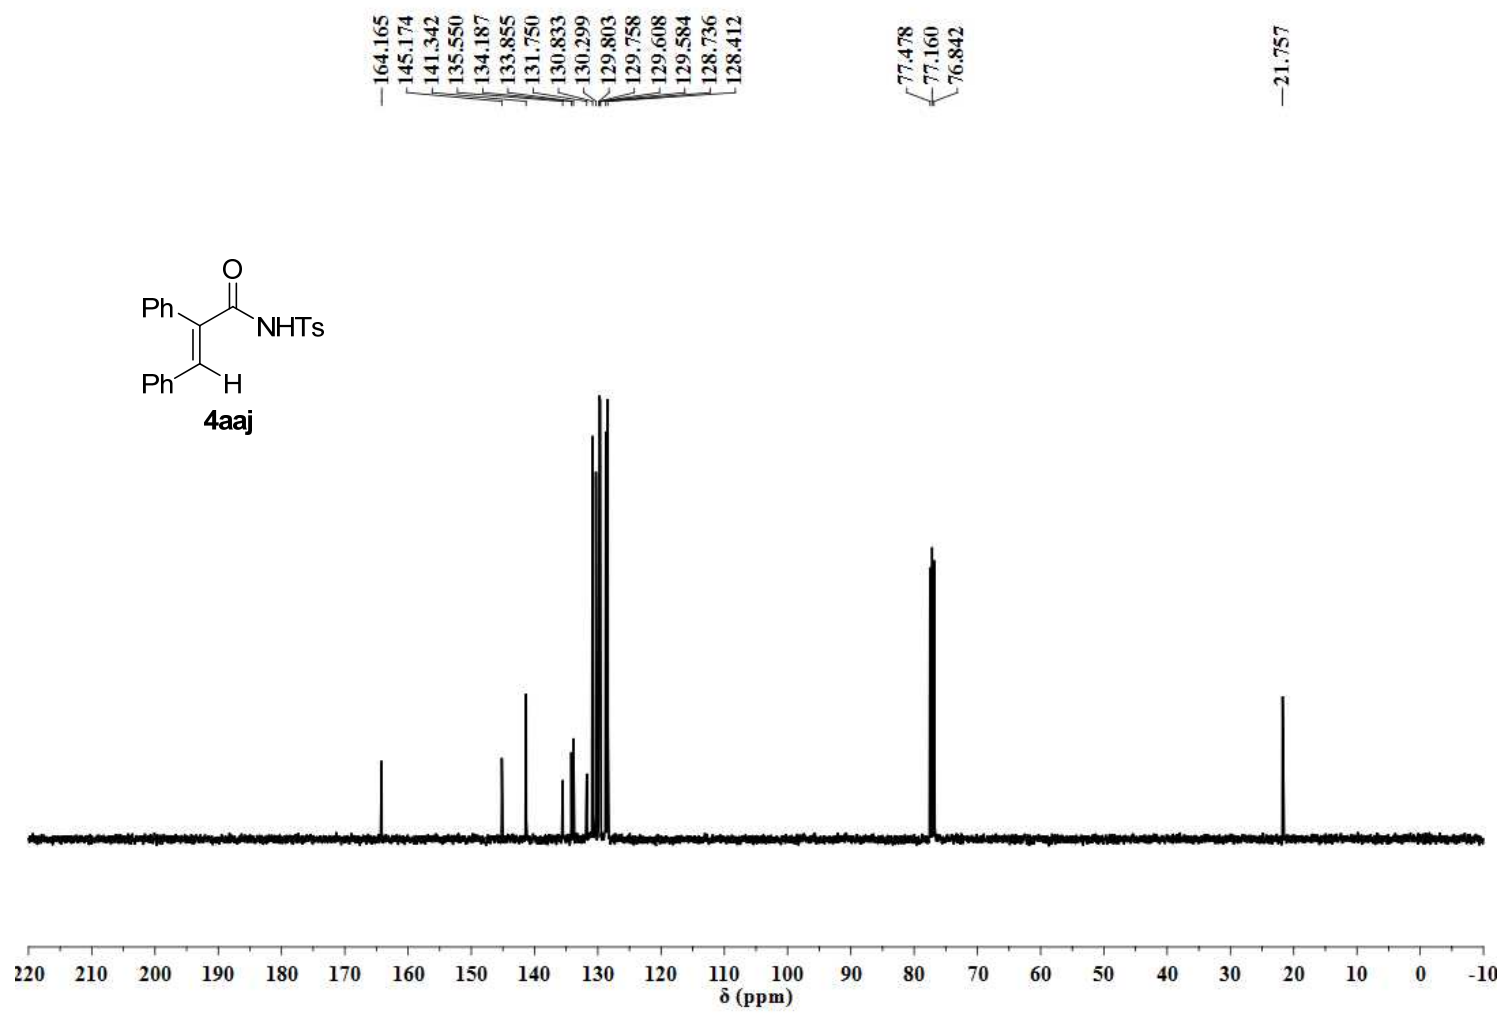



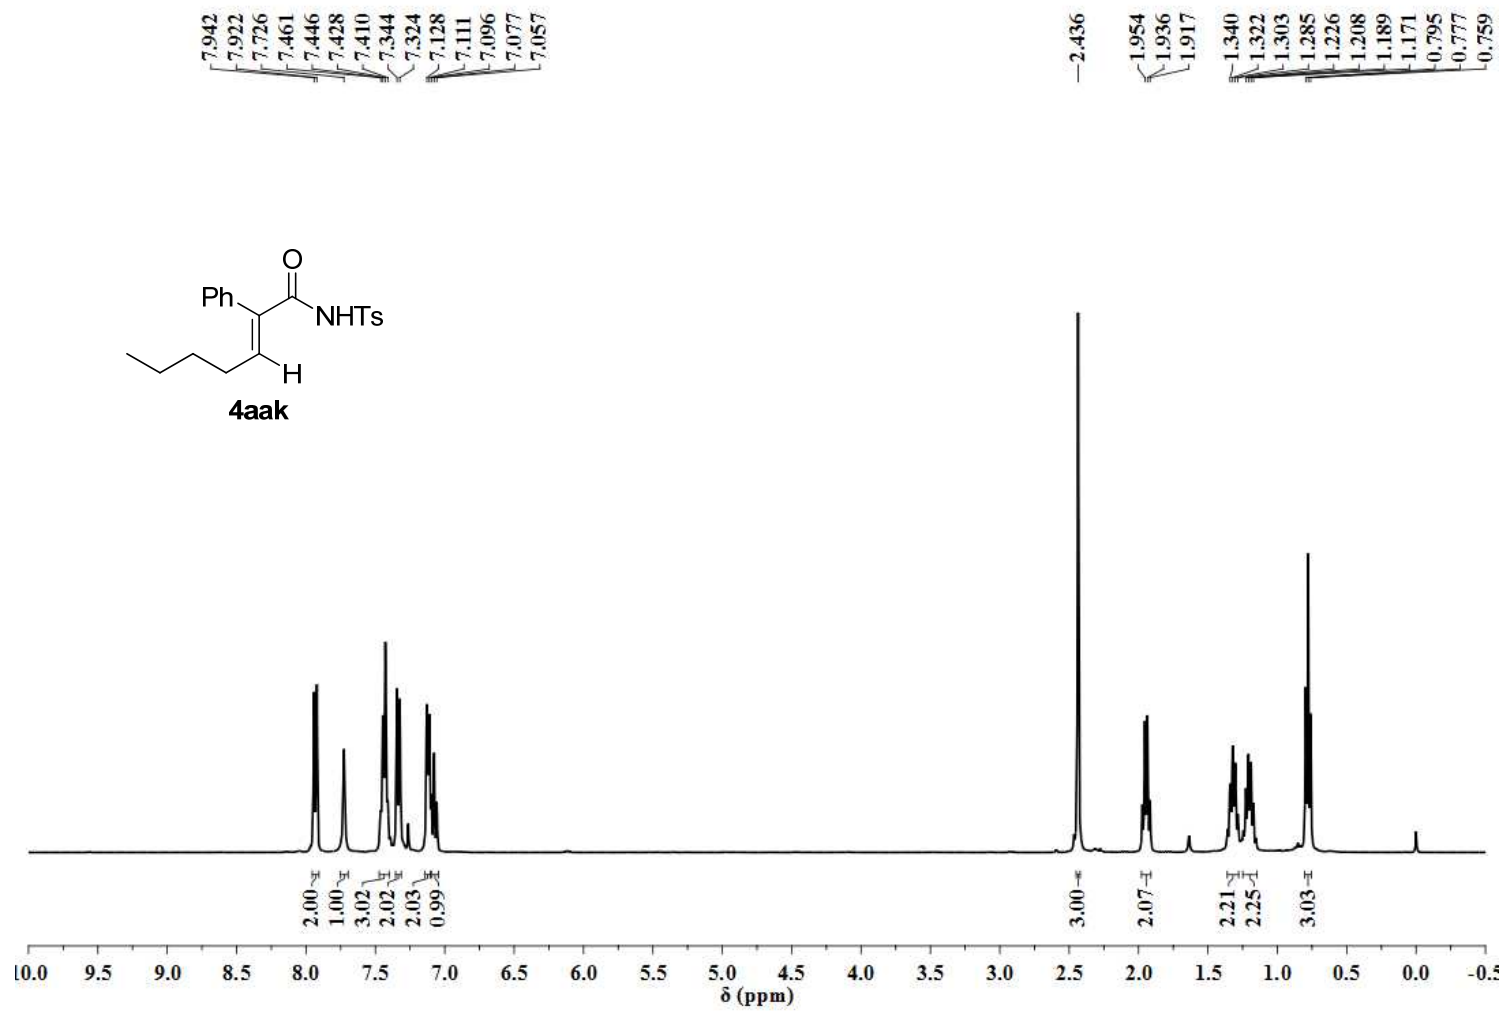

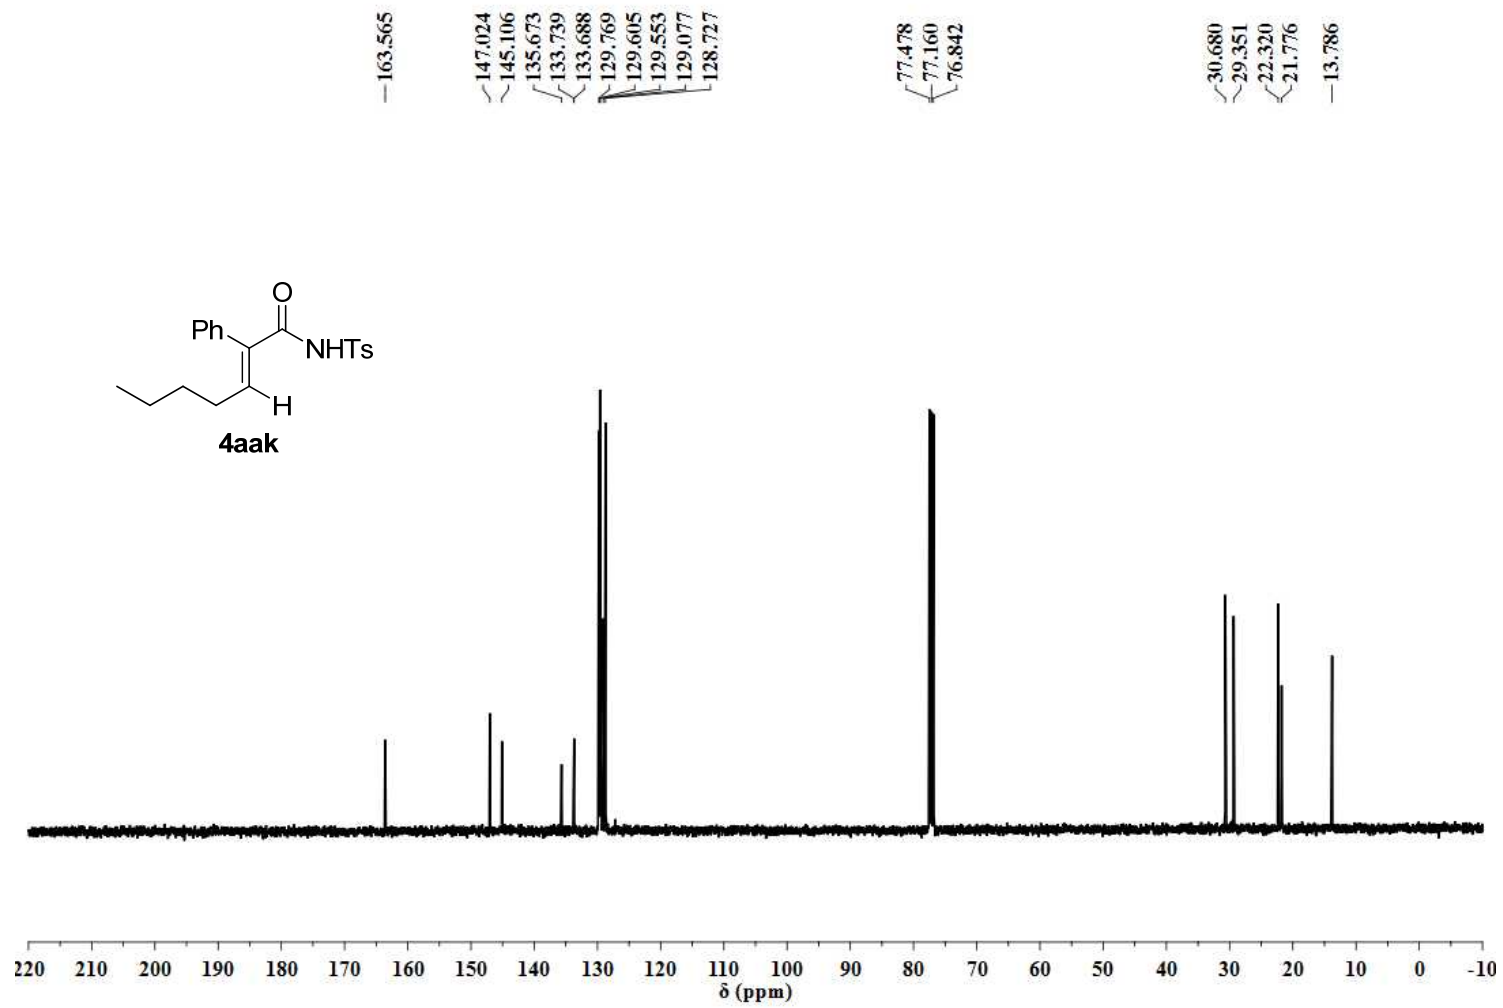

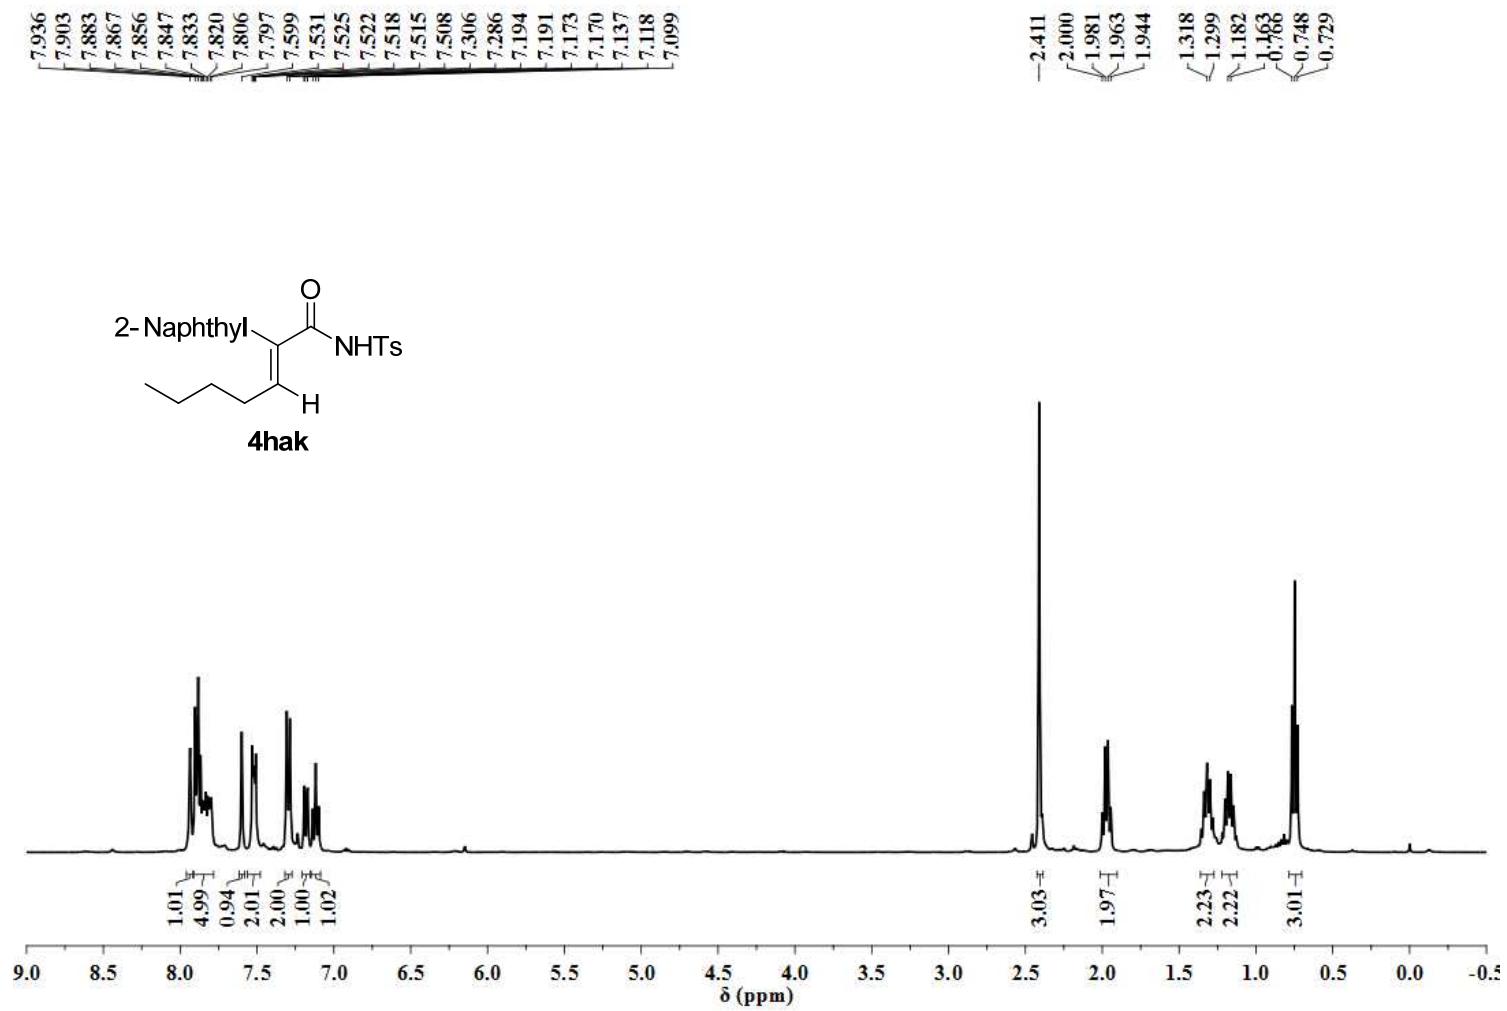

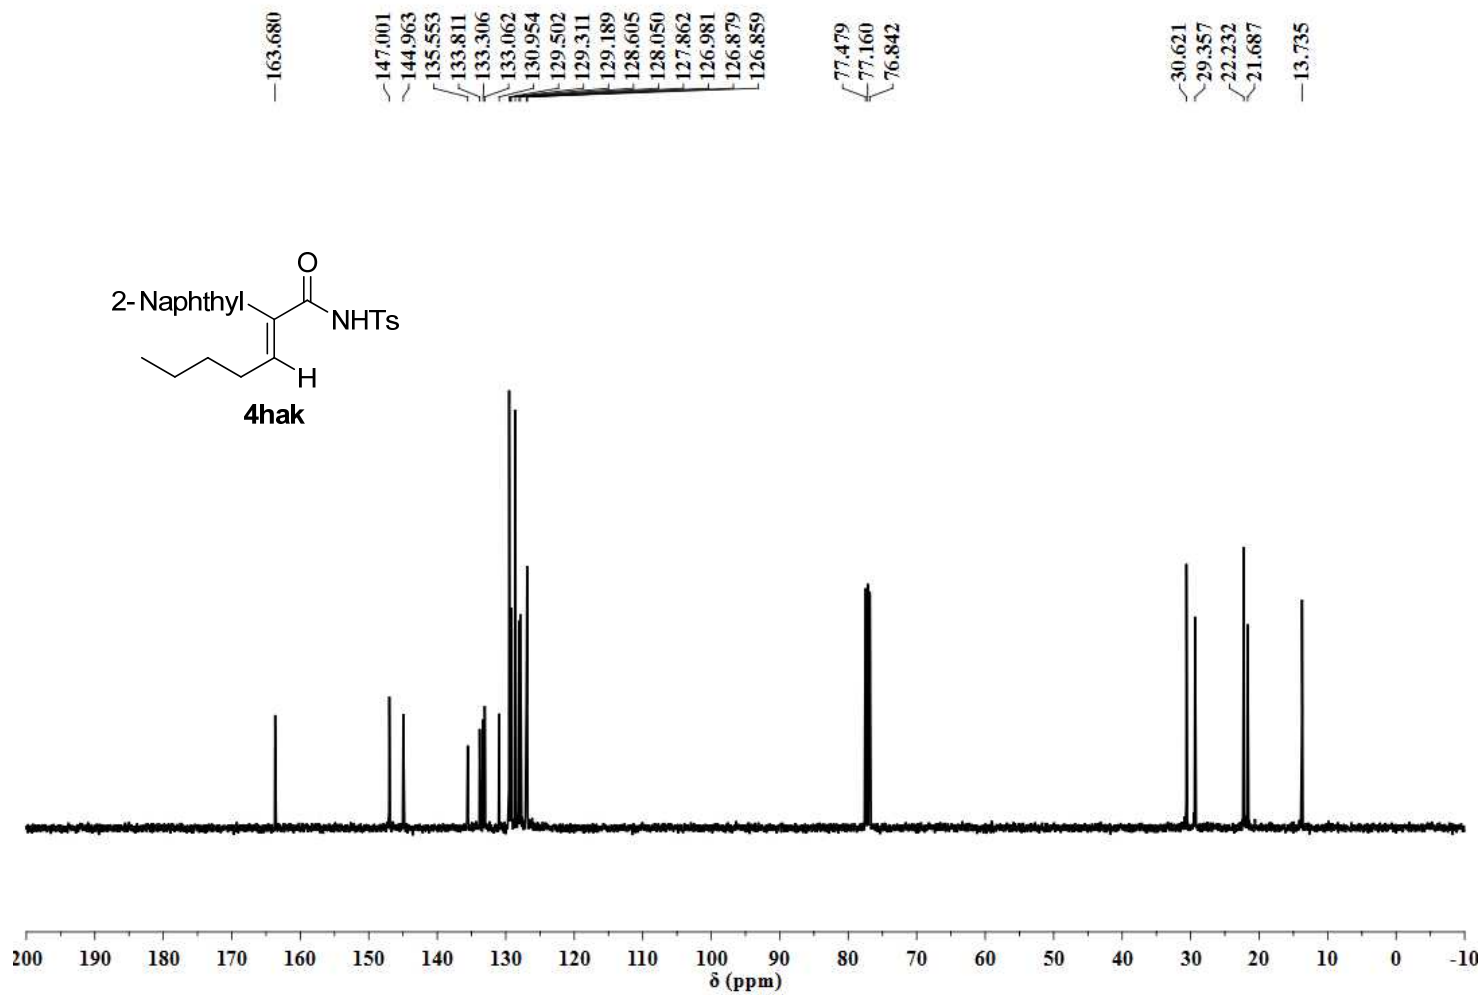

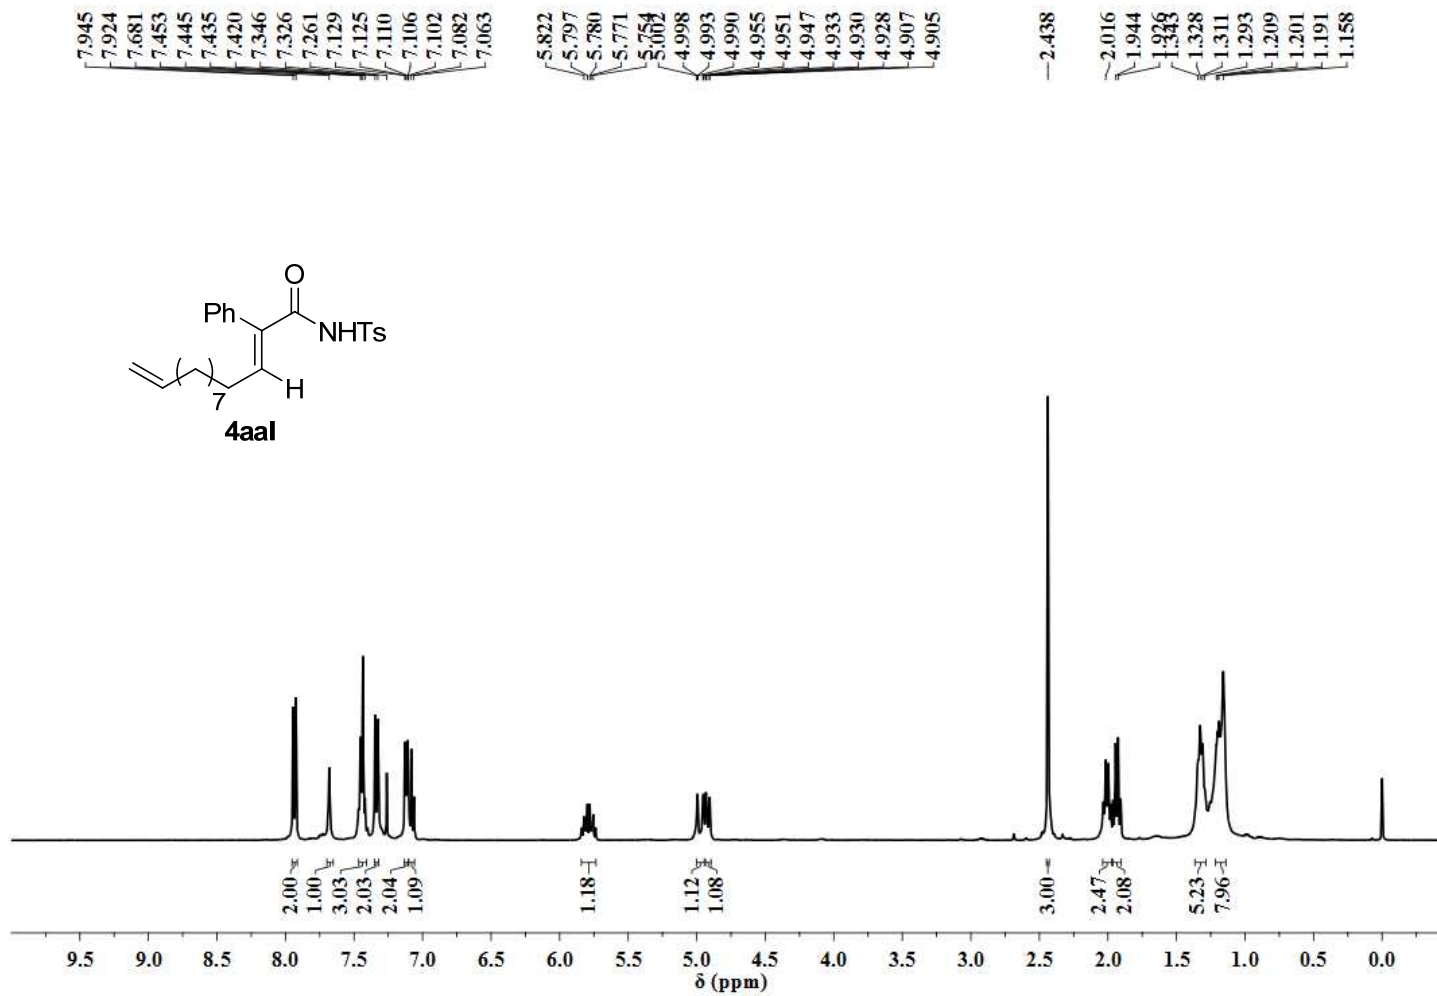

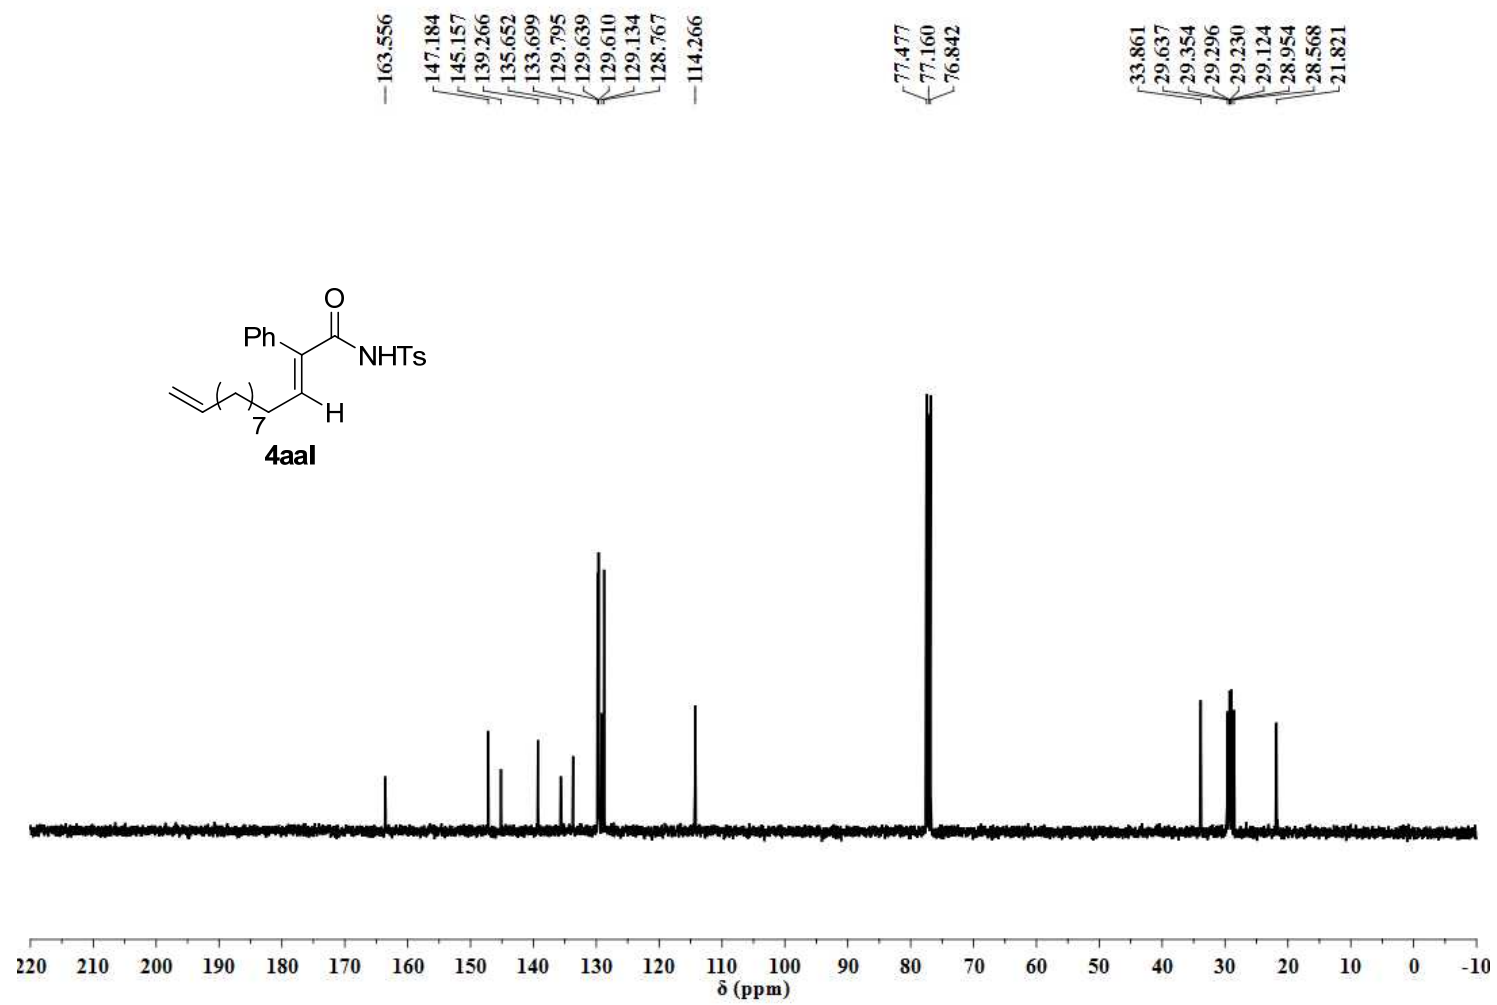

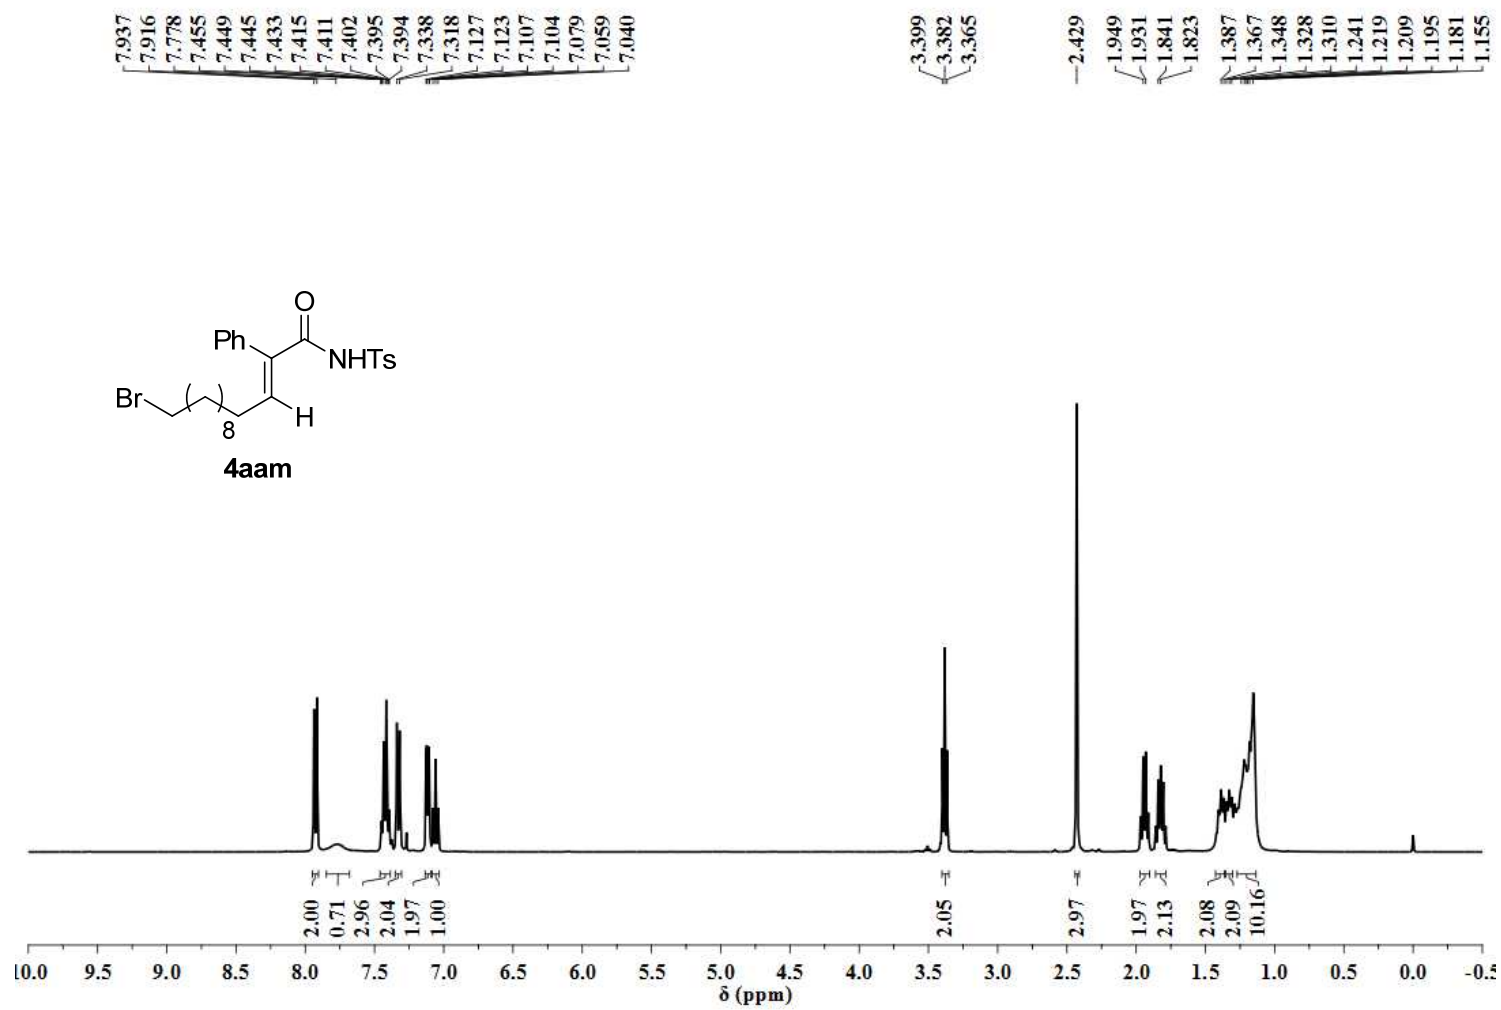

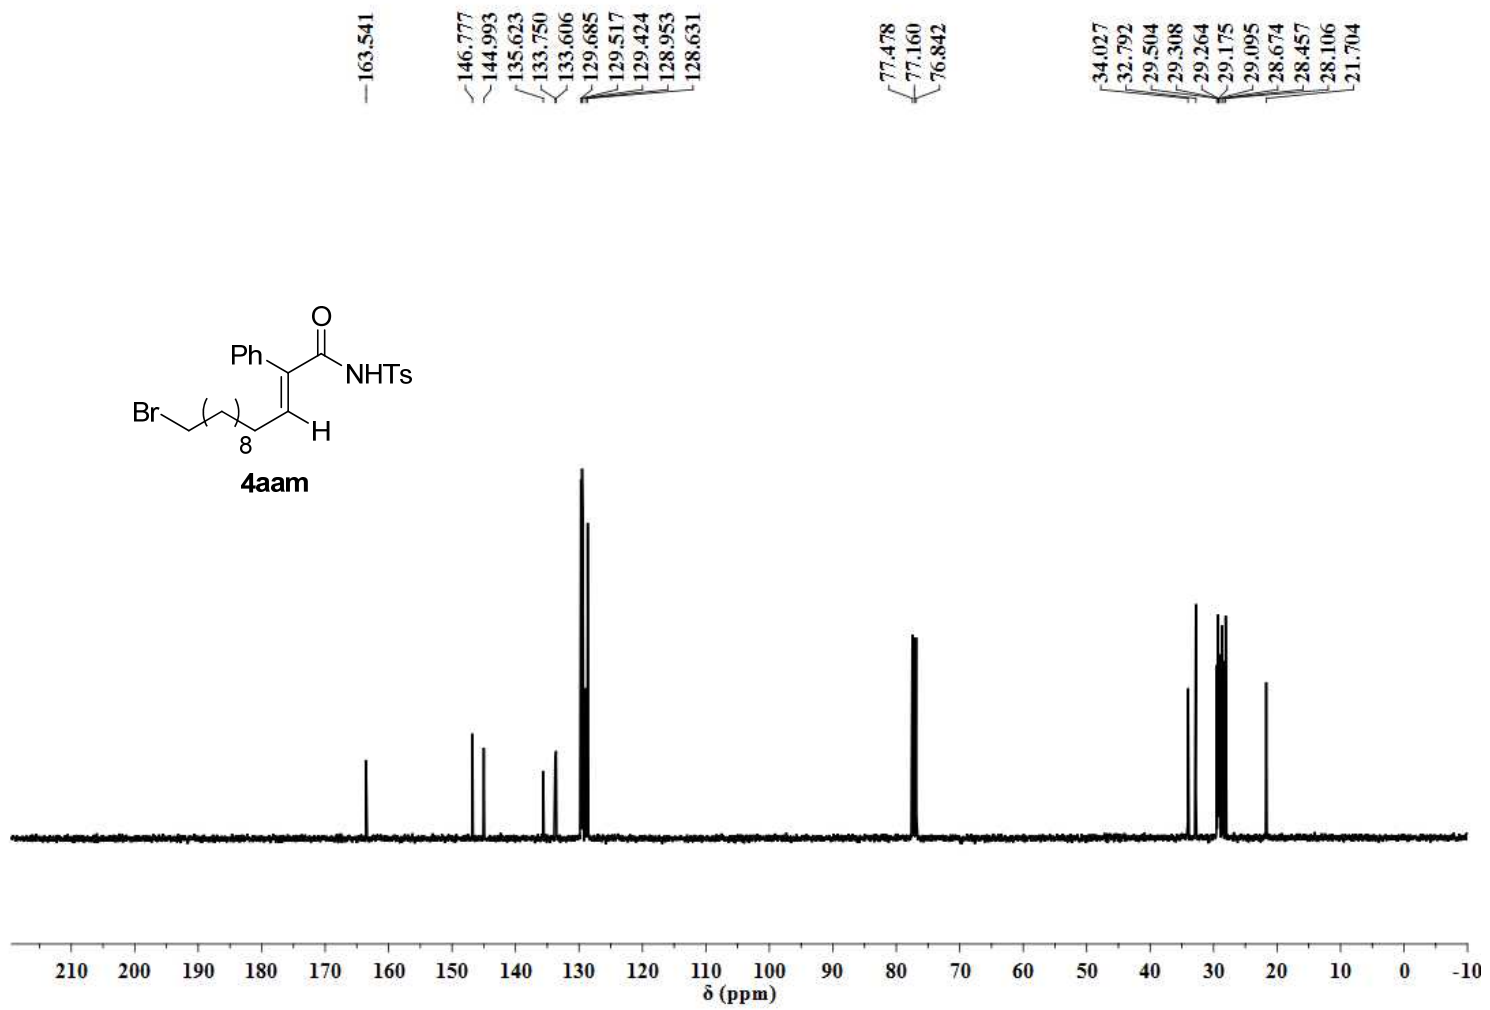



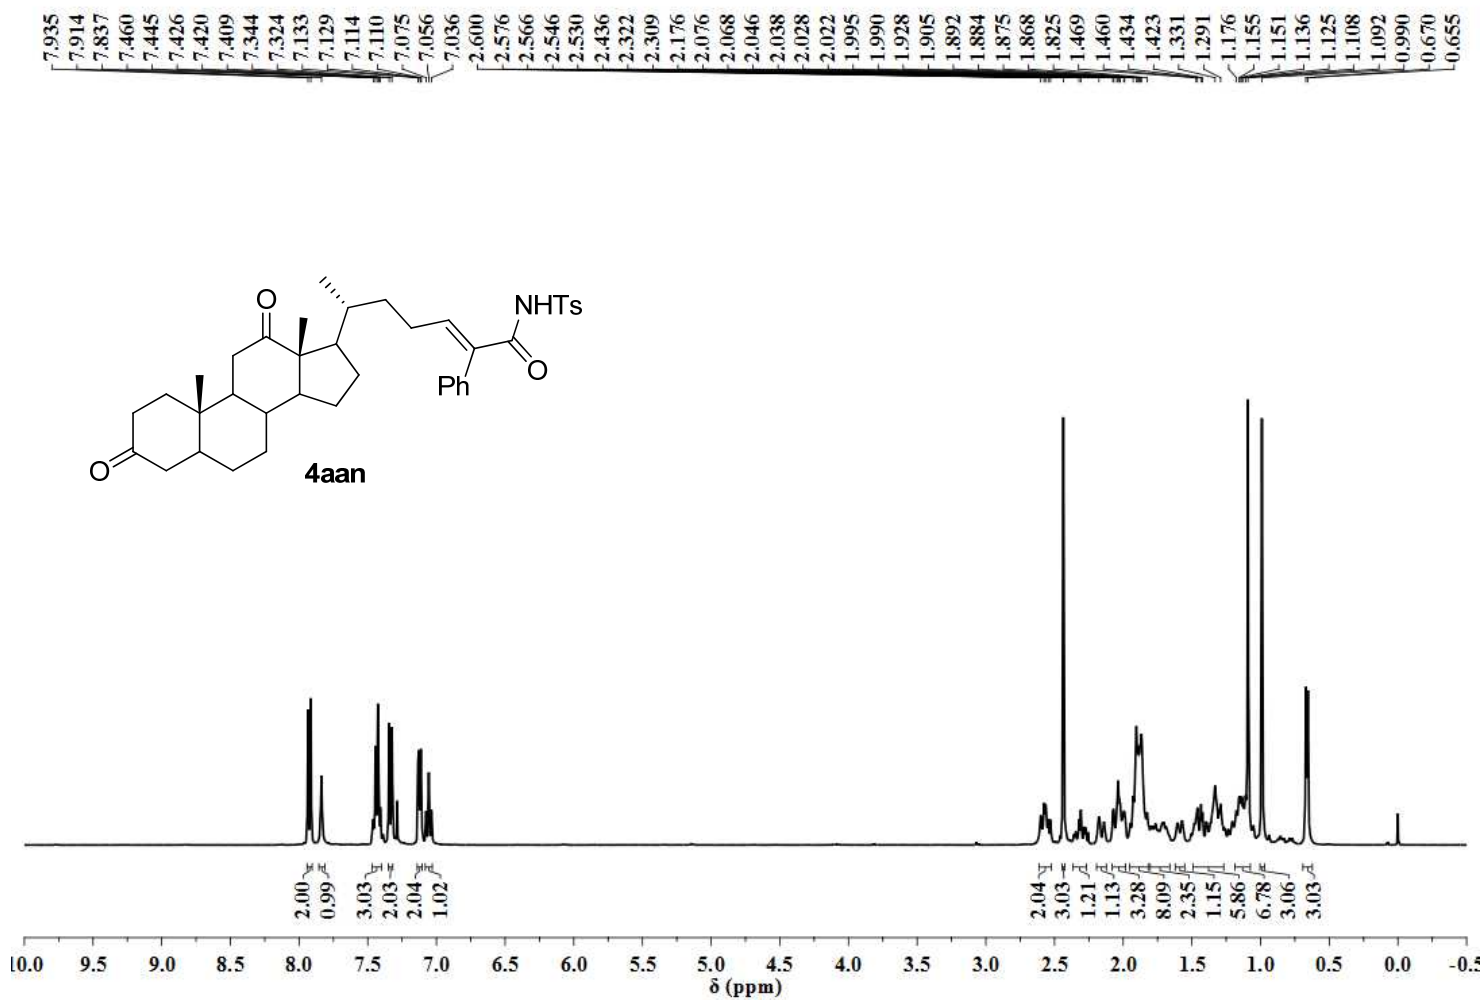

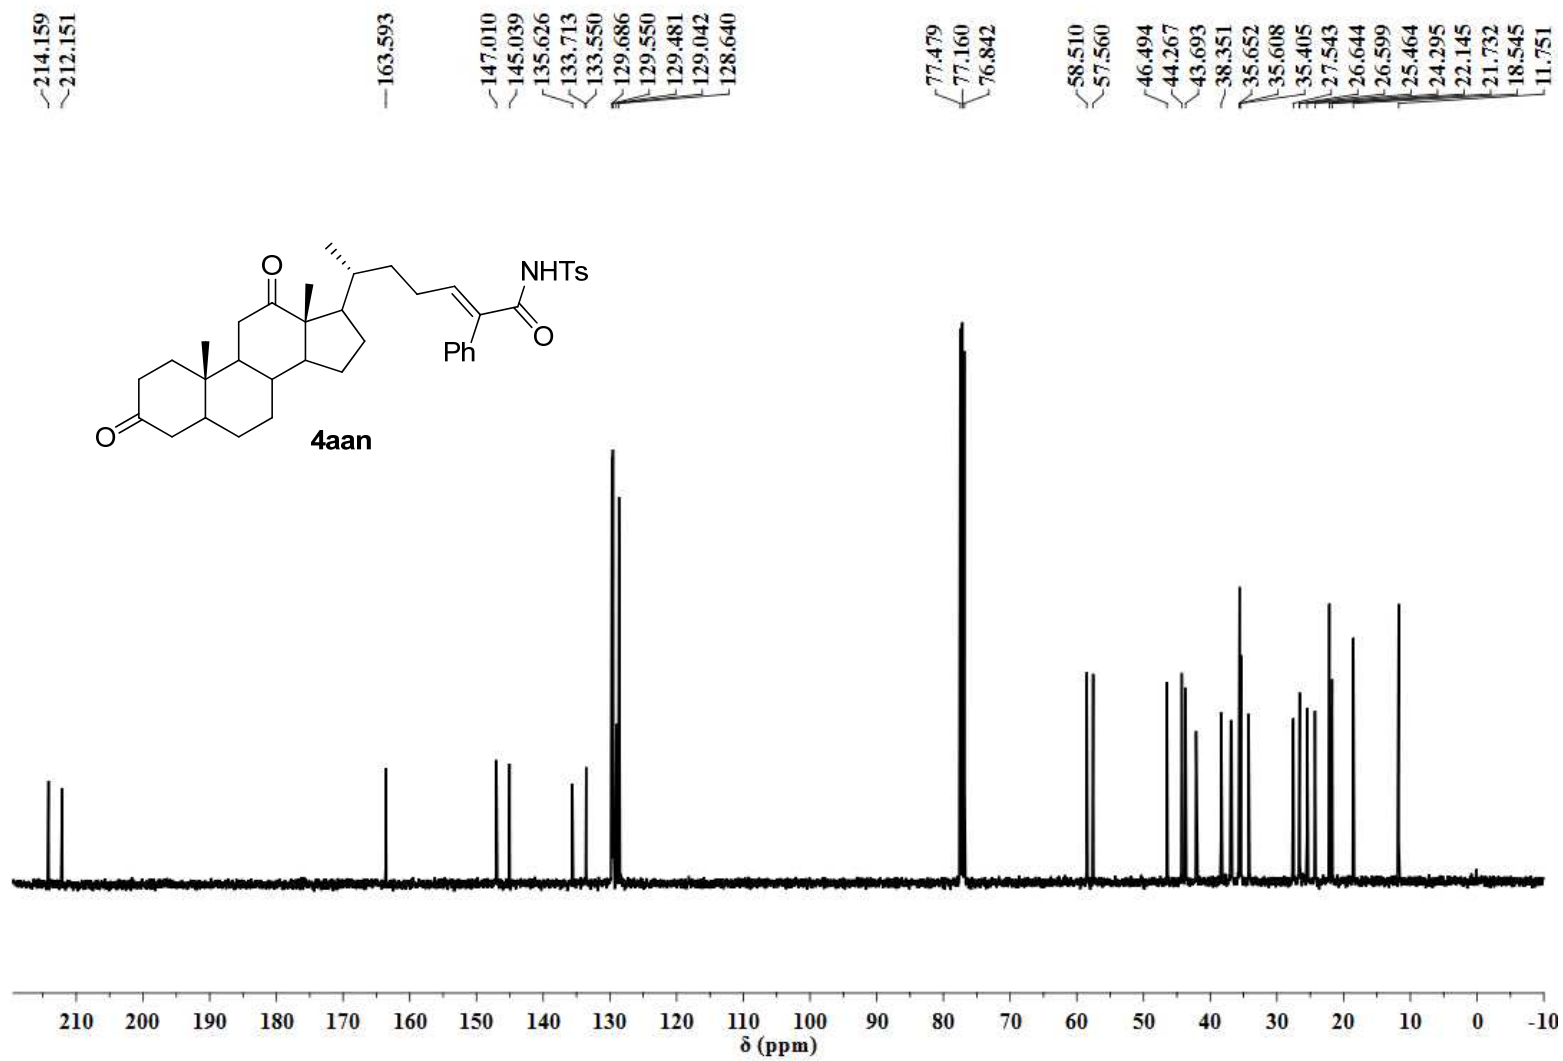

Supplement: c6ob00146g1.pdf [file c6ob00146g1.pdf]
